# Supplementary material for: A Low-Cost Library Construction Protocol and Data Analysis Pipeline for Illumina-Based Strand-Specific Multiplex RNA-Seq
Source: PLoS One. 2011 Oct 19;6(10):e26426. doi: 10.1371/journal.pone.0026426 (PMC3198403; doi:10.1371/journal.pone.0026426)
Supplement: Table S1 — List of reagents for library construction. (XLSX) [file pone.0026426.s010.xlsx]

## Sheet: Normal Enzymes
Protocol	Reagent	Company	Catalog Number	Price
mRNA purification	Dynabeads Oglio (dT)25	Invitrogen	610-05	772
	Binding Buffer
	Washing Buffer
	Elution Buffer
mRNA concentration calculation	Qubit RNA 100 Assay Kit (buffer)	Invitrogen	Q32852	70
mRNA fragmentation	5X First Strand Buffer	Invitrogen	18064-014
	Spiking RNA
	Nuclease Free Water	Ambion	AM9930	49.8
First Strand cDNA Synthesis	Random Primer	Invitrogen	48190-011	138
	SupeRase-In	Ambion	AM2694	109
	Superscript 2 Reverse Transcriptase	Invitrogen	18064-014	269
	Nuclease Free Water	Ambion	AM9930	49.8
	DTT (100mM)	Invitrogen	18064-014
	dNTPs (25mM)	Promega	U1420	200
Second Strand cDNA Synthesis	dUTP mix (10mM dA, dC, dG and 20mM dU)	Fermentus	R0133	54
	RNAse H	Enzymatics	Y922L	250
	DNA polymerase 1	Enzymatics	P705L	250
	10X Blue Buffer (NEB2)	Enzymatics	P705L
	DTT (100mM)	Invitrogen	18064-014
End Repair	End Repair Mix LC	Enzymatics	Y914-LC-L	250
	10X End Repair Buffer	Enzymatics	Y914-LC-L
	10mM dNTP mix	Promega	U1420	200
dA-Tailing	10X Blue Buffer (NEB2)	Enzymatics	P705L
	10mM dATP mix	Promega	U1420	200
	Klenow 3'-5' exo-	Enzymatics	P701-LC-L	250
Y-Shaped Adapter Ligation	Index PE adapter	IDT
	T4 DNA Ligase (Rapid)	Enzymatics	L603-HC-L	350
	2X Ligation Buffer	Enzymatics	L603-LC-L
dUTP excision	Uracil DNA Glycosylase	Enzymatics	G501L	250
PCR amplification	PE Primer (5uM each)	IDT		116
	5X Phusion HF Buffer	Finnzymes	F-549L
	10mM dNTP mix	Promega	U1420	200
	Phusion Hot Start 2 High Fidelity DNA Polymerase	Finnzymes	F-549L	510
RNA Clean XP purifications	RNA Clean XP	Beckman Coulter	A63987	650
	100% Ethanol
	75% Ethanol
Ampure XP purification	Ampure XP	Beckman Coulter	A63881	1050
	PEG 8000
	100% Ethanol
	75% Ethanol
Library Concentration Calculation	Qubit DNA HS 100 Assay Kit (buffer)	Invitrogen	Q32851	70

## Sheet: w Pomega & Enzymatics
Protocol	Reagent	Company	Catalog Number	Price
mRNA purification	Dynabeads Oglio (dT)25	Invitrogen	610-05	772
	Binding Buffer
	Washing Buffer
	Elution Buffer
mRNA concentration calculation	Qubit RNA 100 Assay Kit (buffer)	Invitrogen	Q32852	70
mRNA fragmentation	5X First Strand Buffer	Invitrogen	18064-014
	Spiking RNA
	Nuclease Free Water	Ambion	AM9930	49.8
First Strand cDNA Synthesis	Random Primer	Promega	C1181	33	*
	SupeRase-In	Ambion	AM2694	109
	M-MuLV Reverse Transcriptase	Enzymatics	P704L	250
	Nuclease Free Water	Ambion	AM9930	49.8
	dNTPs (25mM)	Promega	U1420	200
Second Strand cDNA Synthesis	dUTP mix (10mM dA, dC, dG and 20mM dU)	Fermentus	R0133	54
	RNAse H	Enzymatics	Y922L	250
	DNA polymerase 1	Enzymatics	P705L	250
	10X Blue Buffer (NEB2)	Enzymatics	P705L
	DTT (100mM)	Invitrogen
End Repair	End Repair Mix LC	Enzymatics	Y914-LC-L	250
	10X End Repair Buffer	Enzymatics	Y914-LC-L
	10mM dNTP mix	Promega	U1420	200
dA-Tailing	10X Blue Buffer (NEB2)	Enzymatics	P705L
	10mM dATP mix	Promega	U1420	200
	Klenow 3'-5' exo-	Enzymatics	P701-LC-L	250
Y-Shaped Adapter Ligation	Index PE adapter	IDT
	T4 DNA Ligase (Rapid)	Enzymatics	L603-HC-L	350
	2X Ligation Buffer	Enzymatics	L603-LC-L
dUTP excision	Uracil DNA Glycosylase	Enzymatics	G501L	250
PCR amplification	PE Primer (5uM each)	IDT		116
	5X Phusion HF Buffer	Finnzymes	F-549L
	10mM dNTP mix	Promega	U1420	200
	Phusion Hot Start 2 High Fidelity DNA Polymerase	Finnzymes	F-549L	510
RNA Clean XP purifications	RNA Clean XP	Beckman Coulter	A63987	650
	100% Ethanol
	75% Ethanol
Ampure XP purification	Ampure XP	Beckman Coulter	A63881	1050
	PEG 8000
	100% Ethanol
	75% Ethanol
Library Concentration Calculation	Qubit DNA HS 100 Assay Kit (buffer)	Invitrogen	Q32851	70

## Sheet: List Normal
Supplemental Table 1: List of reagents for library construction
Reagent	Company	Catalog #	Price
Dynabeads Oglio (dT)25	Invitrogen	610-05	772
Qubit RNA 100 Assay Kit (buffer)	Invitrogen	Q32852	70
Nuclease Free Water	Ambion	AM9930	49.8
Random Primer	Promega	C1181	33
SupeRase-In	Ambion	AM2694	109
Superscript 2 Reverse Transcriptase	Invitrogen	18064-014	269
5X First Strand Buffer	Invitrogen	18064-014	N/A
DTT (100mM)	Invitrogen	18064-014	N/A
dNTPs (100mM)	Promega	U1420	200
dUTP(100mM)	Fermentus	R0133	54
RNAse H	Enzymatics	Y922L	250
DNA polymerase 1	Enzymatics	P705L	250
10X Blue Buffer (NEB2)	Enzymatics	P705L	N/A
End Repair Mix LC	Enzymatics	Y914-LC-L	250
10X End Repair Buffer	Enzymatics	Y914-LC-L	N/A
Klenow 3'-5' exo-	Enzymatics	P701-LC-L	250
T4 DNA Ligase (Rapid)	Enzymatics	L603-HC-L	350
2X Ligation Buffer	Enzymatics	L603-LC-L	N/A
Uracil DNA Glycosylase	Enzymatics	G501L	250
2 PE Primer (5uM each)	IDT	N/A	116
Phusion Hot Start 2 High Fidelity DNA Polymerase	Finnzymes	F-549L	510
5X Phusion HF Buffer	Finnzymes	F-549L	N/A
RNA Clean XP	Beckman Coulter	A63987	650
Ampure XP	Beckman Coulter	A63881	1050
Qubit DNA HS 100 Assay Kit (buffer)	Invitrogen	Q32851	70
