# Supplementary material for: A Low-Cost Library Construction Protocol and Data Analysis Pipeline for Illumina-Based Strand-Specific Multiplex RNA-Seq
Source: PLoS One. 2011 Oct 19;6(10):e26426. doi: 10.1371/journal.pone.0026426 (PMC3198403; doi:10.1371/journal.pone.0026426)
Supplement: Table S4 — List of RPKM, FDR and B values for detected rice intronic expression. (XLSX) [file pone.0026426.s013.xlsx]

## Sheet: Intorns
Table S3: List of RPKM, FDR and B values for significantly detected rice intronic expression
TRANS	GENE	INTRON	INTRON_LEN	INTRON_COV_1	INTRON_COV_2	INTRON_COV_3	B	FDR
13112.m01865	LOC_Os12g17600.2	intron_1	103	172	177.833	135.167	0	0
13112.m01865	LOC_Os12g17600.2	intron_2	81	56506.3	62191.8	52821.5	0	0
13112.m02058	LOC_Os12g19381.1	intron_1	111	2414.5	2592.83	2221.67	0	0
13112.m02058	LOC_Os12g19381.1	intron_2	14663	968451	1.0373e+06	862049	0	0
13111.m23059	LOC_Os11g47970.1	intron_2	287	4920	6483	6111	0	0
13108.m01059	LOC_Os08g10020.2	intron_2	245	90	97.8333	64	0	0
13108.m01059	LOC_Os08g10020.2	intron_4	671	316.333	340.75	198.333	0	0
13108.m00057	LOC_Os08g01380.2	intron_1	93	11485	12257	11474	0	0
13108.m01061	LOC_Os08g10020.3	intron_2	210	81.6667	88.3333	54	0	0
13108.m01061	LOC_Os08g10020.3	intron_4	671	316	340.75	198.333	0	0
13108.m01060	LOC_Os08g10020.1	intron_2	245	90	97.8333	64	0	0
13108.m01060	LOC_Os08g10020.1	intron_4	464	149	156.917	89	0	0
13101.m04641	LOC_Os01g45274.4	intron_3	2350	315.25	331.25	297.5	0	0
13101.m04641	LOC_Os01g45274.4	intron_5	454	95.75	104.25	87.5	0	0
13111.m00721	LOC_Os11g07020.6	intron_3	1214	152821	164167	147274	0	0
13101.m04643	LOC_Os01g45274.1	intron_1	3850	2342.33	2393.92	2233.75	0	0
13101.m04643	LOC_Os01g45274.1	intron_3	2350	315.25	331.25	297.5	0	0
13101.m04643	LOC_Os01g45274.1	intron_5	454	95.5	103.5	87.5	0	0
13107.m03830	LOC_Os07g37240.1	intron_1	372	978	1177	891	0	0
13101.m04640	LOC_Os01g45274.2	intron_1	7307	24706.7	22855	25236.3	0	0
13101.m04640	LOC_Os01g45274.2	intron_4	2350	315.25	331.25	297.5	0	0
13101.m04640	LOC_Os01g45274.2	intron_6	454	95.5	103.5	87.5	0	0
13111.m01416	LOC_Os11g13890.5	intron_2	544	190.75	191.25	140.5	0	0
13111.m01416	LOC_Os11g13890.5	intron_5	723	35793.2	37024.2	36174	0	0
13108.m03529	LOC_Os08g33820.1	intron_2	93	93	103	91	0	0
13101.m04642	LOC_Os01g45274.3	intron_1	3192	692.667	735	566.333	0	0
13101.m04642	LOC_Os01g45274.3	intron_4	2350	315.25	331.25	297.5	0	0
13101.m04642	LOC_Os01g45274.3	intron_6	454	95.5	103.5	87.5	0	0
13111.m01418	LOC_Os11g13890.4	intron_2	544	191	191.25	140.75	0	0
13111.m01418	LOC_Os11g13890.4	intron_5	432	312	269.25	119.75	0	0
13111.m01414	LOC_Os11g13890.1	intron_2	544	190.75	191.25	140.5	0	0
13111.m01414	LOC_Os11g13890.1	intron_5	432	312	269.25	119.75	0	0
13101.m03187	LOC_Os01g31690.2	intron_2	54	2939	2951	2758	0	0
13107.m00503	LOC_Os07g05480.1	intron_1	117	86	109	77	0	0
13107.m00503	LOC_Os07g05480.1	intron_2	118	95.5	107	88	0	0
13107.m00504	LOC_Os07g05480.2	intron_1	118	95.5	107	88	0	0
13112.m02066	LOC_Os12g19470.2	intron_1	103	249	294	232	0	0
13111.m01419	LOC_Os11g13890.2	intron_2	544	190.75	191.25	140.5	0	0
13107.m03696	LOC_Os07g36080.3	intron_1	183	2789	2931	3111.5	0	0
13107.m03696	LOC_Os07g36080.3	intron_3	404	81.8333	80.5	56	0	0
13106.m02312	LOC_Os06g21590.1	intron_3	110	81	103	72	0	0
13111.m01415	LOC_Os11g13890.6	intron_3	432	312	269.25	119.75	0	0
13104.m03709	LOC_Os04g38600.4	intron_3	873	49106	52606.2	49248.2	0	0
13112.m00930	LOC_Os12g08770.1	intron_2	160	91	111	85	0	0
13107.m03695	LOC_Os07g36080.1	intron_2	404	81.8333	80.5	56	0	0
13107.m00428	LOC_Os07g04840.1	intron_2	246	318	382	273	0	0
13102.m01154	LOC_Os02g10390.1	intron_2	548	380.917	340	160.333	0	0
13102.m01156	LOC_Os02g10390.2	intron_2	548	380.917	340	160.333	0	0
13102.m01156	LOC_Os02g10390.2	intron_3	67	2060	2175	2021	0	0
13101.m01120	LOC_Os01g10400.2	intron_2	501	709	698	498	0	0
13102.m01155	LOC_Os02g10390.3	intron_1	548	380.917	340	160.333	0	0
13107.m04032	LOC_Os07g38960.1	intron_4	214	650	802.5	500	0	0
13104.m03686	LOC_Os04g38410.1	intron_1	110	122	126	148	0	0
13102.m05289	LOC_Os02g47020.1	intron_3	170	90	106	47	0	0
13102.m05289	LOC_Os02g47020.1	intron_4	230	268	301	259	0	0
13104.m05869	LOC_Os04g56400.1	intron_11	2763	1008.67	941.417	537.833	0	0
13104.m05869	LOC_Os04g56400.1	intron_13	386	158	218	108	0	0
13103.m06183	LOC_Os03g56670.1	intron_1	107	70	82	75	0	0
13103.m06184	LOC_Os03g56670.2	intron_1	112	73.5	83.5	77	0	0
13106.m01703	LOC_Os06g15400.1	intron_3	207	87	93	70	0	0
13112.m02358	LOC_Os12g23200.2	intron_1	973	547.5	463.833	220	0	0
13112.m02357	LOC_Os12g23200.1	intron_1	973	547.5	463.833	220	0	0
13112.m00929	LOC_Os12g08760.1	intron_2	724	574	716	455	0	0
13112.m00929	LOC_Os12g08760.1	intron_4	116	96	118	88	0	0
13112.m00929	LOC_Os12g08760.1	intron_5	804	1440	1675	1088	0	0
13112.m00929	LOC_Os12g08760.1	intron_6	584	770	431	134	0	0
13110.m03371	LOC_Os10g37180.1	intron_1	360	167	189	118	0	0
13110.m03371	LOC_Os10g37180.1	intron_2	528	177	146	63	0	0
13110.m03371	LOC_Os10g37180.1	intron_3	330	108	67	21	0	0
13101.m07009	LOC_Os01g64960.2	intron_2	1379	292.75	294.833	188.083	0	0
13101.m07009	LOC_Os01g64960.2	intron_3	156	5164	5349	5234	0	0
13101.m01925	LOC_Os01g17170.1	intron_4	222	303	276	87	0	0
13104.m01508	LOC_Os04g16680.1	intron_7	268	222	246	187	0	0
13101.m07008	LOC_Os01g64960.1	intron_2	1379	292.75	294.833	188.083	0	0
13107.m03806	LOC_Os07g37030.1	intron_1	1016	136	191	145	0	0
13107.m03806	LOC_Os07g37030.1	intron_4	202	76	115	72	0	0
13104.m04056	LOC_Os04g41340.1	intron_7	296	157	160	113	0	0
13105.m04424	LOC_Os05g41640.1	intron_1	299	138.333	156	116.5	0	0
13105.m04424	LOC_Os05g41640.1	intron_6	268	12114.5	13477.5	9536.5	0	0
13105.m10398	LOC_Os05g41640.3	intron_6	306	13866.5	15439.5	11170	0	0
13107.m02865	LOC_Os07g28610.2	intron_5	626	178.5	178	87.5	0	0
13107.m00158	LOC_Os07g02340.1	intron_2	782	399	509	348	0	0
13107.m02866	LOC_Os07g28610.1	intron_5	626	178.5	178	87.5	0	0
13104.m05476	LOC_Os04g53230.1	intron_1	1064	112	138	80	0	0
13102.m05803	LOC_Os02g51080.1	intron_1	664	515	558	429	0	0
13103.m06136	LOC_Os03g56280.1	intron_5	639	448	537	307	0	0
13110.m03130	LOC_Os10g35030.1	intron_10	605	102.667	115.667	90	0	0
13110.m07881	LOC_Os10g35030.3	intron_10	638	148.667	181.667	143	0	0
13107.m24461	LOC_Os07g01760.1	intron_5	726	94	106	81	0	0
13102.m05855	LOC_Os02g51470.2	intron_1	469	1641	1837.5	1477.5	0	0
13109.m03594	LOC_Os09g36450.1	intron_2	738	1130.5	1240	909	0	0
13110.m03129	LOC_Os10g35030.2	intron_10	605	102.667	115.667	90	0	0
13109.m03593	LOC_Os09g36450.2	intron_2	738	1130.5	1240	909	0	0
13102.m05856	LOC_Os02g51470.3	intron_1	455	1625	1827.5	1462.5	0	0
13105.m02311	LOC_Os05g22840.1	intron_1	328	2684	2969	2604	0	0
13105.m02311	LOC_Os05g22840.1	intron_2	193	571	572	505	0	0
13106.m05007	LOC_Os06g47230.1	intron_2	1439	93	101	84	0	0
13107.m00792	LOC_Os07g08030.1	intron_1	1054	92	115	88	0	0
13103.m03188	LOC_Os03g27310.1	intron_1	1430	148	148	94	0	0
13108.m00667	LOC_Os08g06530.1	intron_2	698	99.25	82.8333	49.25	0	0
13108.m00607	LOC_Os08g06110.2	intron_2	161	296	329	276	0	0
13108.m00607	LOC_Os08g06110.2	intron_7	90	72	84.75	83.25	0	0
13101.m05861	LOC_Os01g55570.3	intron_5	436	132.333	126	95.3333	0	0
13108.m04190	LOC_Os08g39300.2	intron_4	136	1931	2020	1862	0	0
13108.m00608	LOC_Os08g06110.3	intron_7	90	72	84.75	83.25	0	0
13108.m00610	LOC_Os08g06110.5	intron_6	90	72	84.75	83.25	0	0
13108.m00609	LOC_Os08g06110.4	intron_6	90	72	84.75	83.25	0	0
13101.m05860	LOC_Os01g55570.1	intron_5	436	132.333	126	95.3333	0	0
13103.m06743	LOC_Os03g61260.3	intron_1	614	2293	2336.83	2245.33	0	0
13105.m02290	LOC_Os05g22614.3	intron_1	81	131	133	168	0	0
13105.m02290	LOC_Os05g22614.3	intron_4	1391	192.333	183.5	120.583	0	0
13101.m01923	LOC_Os01g17150.1	intron_1	700	113	143	83	0	0
13106.m01036	LOC_Os06g09610.2	intron_1	144	204	191	203	0	0
13105.m02288	LOC_Os05g22614.1	intron_3	1391	192.333	183.5	120.583	0	0
13107.m03832	LOC_Os07g37250.1	intron_3	1125	194.833	213.583	146.75	0	0
13101.m08164	LOC_Os01g74650.2	intron_7	1393	104.333	116.667	79.6667	0	0
13103.m04011	LOC_Os03g36750.1	intron_7	1994	106.083	127.5	90.9167	0	0
13107.m03714	LOC_Os07g36190.1	intron_1	1222	181	191	151	0	0
13107.m03714	LOC_Os07g36190.1	intron_3	431	207	206	112	0	0
13107.m03714	LOC_Os07g36190.1	intron_5	219	92	85	32	0	0
13101.m08162	LOC_Os01g74650.1	intron_7	1393	104.333	116.667	79.6667	0	0
13110.m02411	LOC_Os10g28360.1	intron_2	759	263	281	210	0	0
13110.m02411	LOC_Os10g28360.1	intron_4	557	146	153	111	0	0
13101.m15078	LOC_Os01g55570.4	intron_4	436	132.333	126	95.3333	0	0
13107.m04903	LOC_Os07g46460.1	intron_31	367	110	101	70	0	0
13108.m04930	LOC_Os08g45190.1	intron_1	190	80	96	59	0	0
13112.m03987	LOC_Os12g38640.2	intron_2	144	581	662	652	0	0
13102.m03626	LOC_Os02g33450.1	intron_4	1326	127.5	123	78.5	0	0
13101.m08163	LOC_Os01g74650.3	intron_7	1393	104.333	116.667	79.6667	0	0
13101.m06963	LOC_Os01g64660.2	intron_5	404	92.25	103	82.75	0	0
13106.m10575	LOC_Os06g46770.6	intron_2	684	5807	6272.67	5740.92	0	0
13108.m00605	LOC_Os08g06100.1	intron_1	1691	371.25	370	239.75	0	0
13102.m01778	LOC_Os02g15900.1	intron_1	471	114	124	128	0	0
13102.m01778	LOC_Os02g15900.1	intron_2	548	84	91	32	0	5.21001968870824e-313
13103.m02483	LOC_Os03g20700.2	intron_4	288	154.75	148.5	146.167	0	0
13106.m10490	LOC_Os06g46770.4	intron_2	228	915.833	1020.67	889.583	0	0
13106.m10491	LOC_Os06g46770.5	intron_2	228	509	568.333	503.917	0	0
13101.m06965	LOC_Os01g64660.3	intron_4	404	92.25	103	82.75	0	0
13105.m00025	LOC_Os05g01110.1	intron_1	1615	174	185	108	0	0
13106.m04229	LOC_Os06g40640.3	intron_2	394	165.667	185.333	128.667	0	0
13106.m04227	LOC_Os06g40640.2	intron_1	394	165.667	185.333	128.667	0	0
13106.m04945	LOC_Os06g46770.3	intron_2	228	4199.75	4466.92	4080.58	0	0
13101.m05891	LOC_Os01g55830.1	intron_1	1926	216.333	217	158	0	0
13101.m05891	LOC_Os01g55830.1	intron_2	880	151	149	88	0	0
13101.m07589	LOC_Os01g69950.1	intron_1	798	167	192	172	0	0
13108.m03578	LOC_Os08g34210.1	intron_1	467	122	153	123	0	0
13105.m05342	LOC_Os05g49880.1	intron_5	872	92	82	60	0	2.17522281894526e-319
13106.m04228	LOC_Os06g40640.4	intron_1	394	165.667	185.333	128.667	0	0
13101.m15103	LOC_Os01g64660.4	intron_3	404	92.25	103	82.75	0	0
13107.m03997	LOC_Os07g38630.1	intron_1	292	1470	1562	1698	0	0
13105.m05343	LOC_Os05g49880.2	intron_4	872	92	82	60	0	2.84280431960595e-319
13101.m06964	LOC_Os01g64660.1	intron_5	404	92.25	103	82.75	0	0
13101.m05053	LOC_Os01g48690.2	intron_1	1026	95.5	76.5	71	0	1.69295052007024e-318
13101.m05052	LOC_Os01g48690.1	intron_2	1026	95.5	76.5	71	0	1.36725750567523e-318
13110.m03173	LOC_Os10g35370.1	intron_2	1198	254	256.5	167	0	0
13103.m01642	LOC_Os03g14040.2	intron_6	83	175	180	104	0	0
13106.m04831	LOC_Os06g45820.2	intron_2	417	2723	3327	2613	0	0
13104.m04779	LOC_Os04g47220.1	intron_2	561	92	113	66	0	0
13107.m00639	LOC_Os07g06660.1	intron_3	572	115	142	58	0	0
13104.m03729	LOC_Os04g38750.1	intron_1	844	103	107	87	0	0
13108.m09353	LOC_Os08g14440.3	intron_6	647	568	670.667	606.333	0	0
13106.m04832	LOC_Os06g45820.3	intron_3	174	140	159	139	0	0
13111.m02328	LOC_Os11g24450.1	intron_1	949	819.5	880	791	0	0
13111.m02328	LOC_Os11g24450.1	intron_3	851	125	156	100	0	0
13101.m42771	LOC_Os01g68950.1	intron_1	1228	337	361	243	0	0
13103.m03854	LOC_Os03g34040.2	intron_1	117	367	387	389	0	0
13106.m02274	LOC_Os06g21270.1	intron_2	102	568.5	606	613.167	0	0
13103.m02163	LOC_Os03g18070.1	intron_6	872	359	389	245	0	0
13104.m29426	LOC_Os04g42095.1	intron_1	262	1814	2007	1621	0	0
13102.m01756	LOC_Os02g15750.1	intron_1	325	278	305	142	0	0
13103.m01118	LOC_Os03g10060.1	intron_2	2460	437	467	307	0	0
13108.m02874	LOC_Os08g27850.2	intron_2	1723	128.5	161	108.5	0	0
13107.m04219	LOC_Os07g40580.1	intron_5	906	172	209	112	0	0
13106.m01044	LOC_Os06g09679.3	intron_2	1613	2341.75	2738.25	2139	0	0
13101.m05365	LOC_Os01g51410.2	intron_5	290	2195	2726	2208	0	0
13108.m02873	LOC_Os08g27850.1	intron_2	1648	106.5	123	80.5	0	0
13103.m00222	LOC_Os03g02590.2	intron_1	229	64	78.5	65	0	0
13107.m02646	LOC_Os07g26690.1	intron_1	1886	166	190	124.5	0	0
13103.m00223	LOC_Os03g02590.3	intron_1	305	181	202.5	215	0	0
13103.m12991	LOC_Os03g36540.2	intron_3	107	1082	1125	1071	0	0
13101.m01504	LOC_Os01g13690.1	intron_2	927	87.5	100.5	64.5	0	0
13101.m07277	LOC_Os01g67120.1	intron_10	676	211.5	201	109.5	0	0
13101.m07277	LOC_Os01g67120.1	intron_11	172	69	79	51	0	0
13101.m07277	LOC_Os01g67120.1	intron_9	212	77	93.5	69	0	0
13101.m07277	LOC_Os01g67120.1	intron_12	164	55	59	52	0	6.91691904177745e-322
13106.m04268	LOC_Os06g40940.2	intron_11	463	3607.33	3928	3358	0	0
13106.m04268	LOC_Os06g40940.2	intron_8	1507	8732	9954	8134.33	0	0
13112.m00258	LOC_Os12g03070.3	intron_4	159	53.25	53.25	57.75	0	5.0429280471016e-320
13103.m02559	LOC_Os03g21370.2	intron_2	2316	105.5	116.5	98.5	0	0
13107.m02647	LOC_Os07g26690.2	intron_1	1886	166	190	124.5	0	0
13102.m04624	LOC_Os02g41860.1	intron_3	562	92.5	111.5	87.5	0	0
13102.m04624	LOC_Os02g41860.1	intron_4	76	198	204	202	0	0
13108.m00157	LOC_Os08g02210.1	intron_5	93	249	290	206	0	0
13103.m04203	LOC_Os03g38730.3	intron_4	570	149.167	158.833	119.667	0	0
13111.m03100	LOC_Os11g31900.2	intron_1	1325	1423.5	1512.33	1318.33	0	0
13105.m00186	LOC_Os05g02250.2	intron_1	1697	151.583	207.25	161.75	0	0
13101.m01505	LOC_Os01g13690.2	intron_2	927	87.5	100.5	64.5	0	0
13105.m04351	LOC_Os05g41060.2	intron_4	801	1715	1927.5	1670.5	0	0
13102.m00739	LOC_Os02g06640.4	intron_2	456	4210	4642.92	3937.83	0	0
13109.m03946	LOC_Os09g39390.1	intron_1	453	76	79	59	0	0
13109.m01361	LOC_Os09g14600.1	intron_4	570	150.167	158.833	119.667	0	0
13107.m02248	LOC_Os07g22930.3	intron_1	317	158.5	180	84.5	0	0
13102.m04623	LOC_Os02g41860.2	intron_3	562	92.5	111.5	87.5	0	0
13104.m05780	LOC_Os04g55710.1	intron_1	1602	2011	2135	1841	0	0
13102.m00738	LOC_Os02g06640.3	intron_2	228	2781.42	3040	2793.25	0	0
13104.m04514	LOC_Os04g45070.1	intron_1	2055	446	470	339	0	0
13103.m05620	LOC_Os03g51600.2	intron_4	54	282	309	306	0	0
13107.m02247	LOC_Os07g22930.2	intron_2	317	158.5	180	84.5	0	0
13107.m04876	LOC_Os07g46310.1	intron_1	174	2269	2593	2166	0	0
13101.m07278	LOC_Os01g67120.2	intron_10	676	211.5	201	109.5	0	0
13101.m07278	LOC_Os01g67120.2	intron_11	172	69	79	51	0	0
13101.m07278	LOC_Os01g67120.2	intron_9	212	77	93.5	69	0	0
13101.m05023	LOC_Os01g48420.1	intron_1	1004	163	186	129	0	0
13107.m01144	LOC_Os07g11110.1	intron_4	413	126	114	95	0	0
13103.m01453	LOC_Os03g12670.3	intron_2	841	2686	2758	1604	0	0
13103.m01452	LOC_Os03g12670.1	intron_2	812	2504	2580	1558	0	0
13105.m03314	LOC_Os05g32220.1	intron_5	1524	164.75	173.917	123	0	0
13111.m01409	LOC_Os11g13850.2	intron_3	255	220	178	51	0	0
13104.m03590	LOC_Os04g37580.1	intron_2	584	428	554	362	0	0
13104.m03590	LOC_Os04g37580.1	intron_3	392	111	113	74	0	0
13103.m03289	LOC_Os03g28160.1	intron_1	97	95	124	103	0	0
13107.m02952	LOC_Os07g29410.2	intron_1	92	431	438	470	0	0
13111.m01410	LOC_Os11g13850.3	intron_3	248	220	177	47	0	0
13102.m05489	LOC_Os02g48560.2	intron_1	3153	110.25	119.75	106	0	0
13101.m02698	LOC_Os01g25484.2	intron_3	93	159	168	164.5	0	0
13102.m05490	LOC_Os02g48560.6	intron_1	3174	113.25	122.75	109	0	0
13108.m04170	LOC_Os08g39140.2	intron_3	162	847.5	928.5	857	0	0
13102.m05492	LOC_Os02g48560.5	intron_1	3151	110.25	119.75	106	0	0
13102.m05494	LOC_Os02g48560.3	intron_1	3150	110	119.75	106	0	0
13101.m05444	LOC_Os01g52110.3	intron_1	1770	3150.92	3465.5	2604.92	0	0
13103.m04424	LOC_Os03g41080.1	intron_3	1047	92	109	54	0	0
13101.m05450	LOC_Os01g52110.8	intron_1	1770	3150.92	3465.5	2604.92	0	0
13112.m01329	LOC_Os12g12580.1	intron_1	510	488	414	244	0	0
13101.m05443	LOC_Os01g52110.2	intron_1	1740	3111.42	3417.5	2559.92	0	0
13110.m02718	LOC_Os10g31320.2	intron_1	336	1608	1717	1732	0	0
13112.m00165	LOC_Os12g02340.2	intron_1	889	2305	2198.25	2211.25	0	0
13103.m04908	LOC_Os03g45619.1	intron_1	11242	565.333	603.333	505.917	0	0
13108.m04455	LOC_Os08g41460.3	intron_7	256	673	722	668	0	0
13108.m04169	LOC_Os08g39140.4	intron_3	615	6359.5	6855.5	6186	0	0
13103.m13003	LOC_Os03g45619.2	intron_1	11242	565.333	603.333	505.917	0	0
13106.m03954	LOC_Os06g38210.1	intron_1	2663	517.667	516	388.75	0	0
13105.m00252	LOC_Os05g02780.4	intron_2	560	109	117	87.75	0	0
13105.m00253	LOC_Os05g02780.2	intron_1	678	116.5	136.833	111.667	0	0
13105.m00253	LOC_Os05g02780.2	intron_2	560	109	117	87.75	0	0
13105.m01490	LOC_Os05g14180.1	intron_2	739	631	574	254	0	0
13103.m00728	LOC_Os03g06630.2	intron_1	946	1687	1918.5	1547.5	0	0
13103.m05403	LOC_Os03g49720.1	intron_5	636	98	110	60	0	0
13103.m05403	LOC_Os03g49720.1	intron_3	570	67	74	69	0	1.57855016324791e-315
13111.m03183	LOC_Os11g32650.1	intron_1	1655	251	283	191	0	0
13112.m08881	LOC_Os12g02370.3	intron_5	79	1015	1112	893	0	0
13102.m00301	LOC_Os02g03230.1	intron_4	1119	314	373	232	0	0
13103.m00727	LOC_Os03g06630.1	intron_1	107	89	103	77.5	0	0
13103.m00727	LOC_Os03g06630.1	intron_2	779	1034	1199.5	947	0	0
13105.m00591	LOC_Os05g05600.5	intron_2	78	264.5	336.5	262	0	0
13108.m04137	LOC_Os08g38900.2	intron_2	152	72	99.5	72	0	0
13105.m00586	LOC_Os05g05600.4	intron_2	78	264.5	336.5	262	0	0
13111.m00171	LOC_Os11g02440.1	intron_1	1861	258.833	278.333	171.75	0	0
13109.m02421	LOC_Os09g25320.1	intron_1	1032	98	116	59	0	0
13101.m00022	LOC_Os01g01120.1	intron_3	133	56	46	54	0	1.37475778530747e-312
13110.m07841	LOC_Os10g42299.4	intron_3	435	378	461.167	355	0	0
13110.m03975	LOC_Os10g42299.1	intron_3	364	343	413.667	313	0	0
13103.m05885	LOC_Os03g53800.2	intron_1	2178	608.833	645.083	499.417	0	0
13105.m00251	LOC_Os05g02780.1	intron_1	674	116.5	136.833	111.667	0	0
13105.m00251	LOC_Os05g02780.1	intron_2	560	109	117	87.75	0	0
13105.m01047	LOC_Os05g09400.2	intron_3	2502	1951	1963	1351	0	0
13110.m00004	LOC_Os10g01044.1	intron_6	882	210.333	175.333	176.25	0	0
13103.m12966	LOC_Os03g16980.5	intron_9	505	647.25	735.583	649	0	0
13111.m23053	LOC_Os11g05050.1	intron_1	1886	318	334	272	0	0
13112.m00161	LOC_Os12g02320.2	intron_1	51	51	41	46	0	0
13101.m02389	LOC_Os01g22520.2	intron_1	91	202	175	244	0	0
13109.m02542	LOC_Os09g26420.4	intron_1	89	76	60	69	0	0
13108.m00431	LOC_Os08g04500.1	intron_1	182	88	48	37	0	0
13110.m00005	LOC_Os10g01044.3	intron_6	882	210.333	175.333	176.25	0	0
13104.m03186	LOC_Os04g33060.1	intron_5	1118	105	115	98	0	0
13102.m04676	LOC_Os02g42290.2	intron_1	111	584	546.5	637	0	0
13102.m04676	LOC_Os02g42290.2	intron_2	95	561	617.5	524.5	0	0
13109.m03427	LOC_Os09g34140.2	intron_2	1046	3295	3575	2669	0	0
13102.m12422	LOC_Os02g42290.3	intron_1	1147	1808	2024	1664.5	0	0
13106.m05238	LOC_Os06g49110.1	intron_1	247	147	165	113	0	0
13110.m00006	LOC_Os10g01044.2	intron_6	882	210.333	175.333	176.25	0	0
13107.m02271	LOC_Os07g23120.2	intron_1	120	631	571	601	0	0
13108.m04453	LOC_Os08g41460.4	intron_1	1263	970.25	1008.83	945	0	0
13112.m04549	LOC_Os12g43130.1	intron_1	984	248	276	184	0	0
13112.m04549	LOC_Os12g43130.1	intron_4	279	79	63	78	0	0
13108.m04456	LOC_Os08g41460.8	intron_1	4475	1547.25	1593.83	1490.33	0	0
13103.m05677	LOC_Os03g52130.1	intron_2	529	90	85	33	0	4.20699367762051e-318
13108.m04448	LOC_Os08g41460.9	intron_1	2127	1450.25	1506.83	1415.5	0	0
13102.m06036	LOC_Os02g52940.3	intron_3	589	1011.33	1095	921.333	0	0
13103.m12822	LOC_Os03g01014.1	intron_3	722	117	140	78	0	0
13104.m03121	LOC_Os04g32560.2	intron_1	675	283.833	287.5	313.5	0	0
13102.m06038	LOC_Os02g52940.1	intron_4	124	340	350	308	0	0
13106.m00489	LOC_Os06g05120.1	intron_1	1801	537	643.5	533	0	0
13101.m00481	LOC_Os01g05080.1	intron_3	383	60	84	54	0	0
13107.m04663	LOC_Os07g44330.2	intron_4	733	85.6667	91.3333	76.3333	0	0
13110.m00517	LOC_Os10g05970.2	intron_2	162	1508	1393	1447	0	0
13106.m01580	LOC_Os06g14324.1	intron_2	3711	1146.83	1157.75	957.5	0	0
13112.m03202	LOC_Os12g31460.1	intron_2	849	193	186	138	0	0
13104.m06297	LOC_Os04g59610.1	intron_2	199	129.5	135.5	119.5	0	0
13107.m04665	LOC_Os07g44330.1	intron_5	733	85.6667	91.3333	76.3333	0	0
13103.m06872	LOC_Os03g62240.1	intron_1	424	139	154	99	0	0
13108.m09318	LOC_Os08g43560.3	intron_1	1018	122	134.667	144.333	0	0
13102.m06184	LOC_Os02g54060.2	intron_1	1363	382	424.5	405.5	0	0
13103.m02370	LOC_Os03g19760.2	intron_11	839	195.5	225.5	187	0	0
13103.m02370	LOC_Os03g19760.2	intron_19	716	299	377.5	274	0	0
13103.m02370	LOC_Os03g19760.2	intron_22	489	251	242.5	104.5	0	0
13103.m02370	LOC_Os03g19760.2	intron_7	360	257.5	285	128	0	0
13106.m03206	LOC_Os06g30970.1	intron_1	807	97	84	83	0	0
13103.m05920	LOC_Os03g54040.1	intron_1	1419	102.5	93.25	77.1667	0	0
13111.m03391	LOC_Os11g34870.1	intron_2	2148	136.25	131.25	104.917	0	0
13105.m02889	LOC_Os05g28090.1	intron_4	518	88.5	98	62	0	0
13102.m04172	LOC_Os02g38020.2	intron_2	355	1074.5	1334.5	1059	0	0
13107.m03829	LOC_Os07g37230.1	intron_2	1089	153	194	154	0	0
13102.m04044	LOC_Os02g36974.6	intron_2	207	487	496	445	0	0
13103.m03160	LOC_Os03g27019.5	intron_5	659	344	420.5	310	0	0
13103.m02369	LOC_Os03g19760.1	intron_11	839	195.5	225.5	187	0	0
13103.m02369	LOC_Os03g19760.1	intron_18	1531	484	518	437	0	0
13103.m02369	LOC_Os03g19760.1	intron_20	440	262.5	335.5	249	0	0
13103.m02369	LOC_Os03g19760.1	intron_23	337	554	626	500	0	0
13103.m02369	LOC_Os03g19760.1	intron_24	489	251	242.5	104.5	0	0
13103.m02369	LOC_Os03g19760.1	intron_7	360	257.5	285	128	0	0
13103.m01352	LOC_Os03g11960.3	intron_2	1190	177.25	223.5	177.75	0	0
13102.m04764	LOC_Os02g42960.1	intron_5	664	76	122	66	0	0
13110.m01275	LOC_Os10g14870.1	intron_4	302	84	92	72	0	0
13112.m00066	LOC_Os12g01530.3	intron_4	1296	1519.08	1740	1376.17	0	0
13111.m02387	LOC_Os11g25030.1	intron_1	195	172.5	190	175	0	0
13103.m00892	LOC_Os03g07960.1	intron_4	790	150	156	115	0	0
13107.m05274	LOC_Os07g49110.1	intron_20	546	133.333	138.667	126.25	0	0
13107.m05274	LOC_Os07g49110.1	intron_5	498	117	138	76	0	0
13107.m05274	LOC_Os07g49110.1	intron_6	445	307	305	57	0	0
13104.m05337	LOC_Os04g52130.2	intron_6	424	728	844.5	675	0	0
13108.m02645	LOC_Os08g25734.2	intron_1	2268	440.5	366.5	443.5	0	0
13102.m01120	LOC_Os02g10120.1	intron_4	385	87	88	54	0	0
13102.m06813	LOC_Os02g58790.5	intron_7	1849	599.75	681.5	563.75	0	0
13101.m04159	LOC_Os01g40630.1	intron_2	629	125	133	130	0	0
13101.m04159	LOC_Os01g40630.1	intron_3	794	72	97.5	76.5	0	0
13101.m04159	LOC_Os01g40630.1	intron_5	751	87.6667	104.333	85.6667	0	0
13108.m01041	LOC_Os08g09860.1	intron_1	353	78	88	95	0	0
13108.m01041	LOC_Os08g09860.1	intron_3	297	720.333	828	705	0	0
13111.m01164	LOC_Os11g10990.1	intron_1	441	217	214	158	0	0
13105.m02888	LOC_Os05g28090.3	intron_3	518	88.5	98	62	0	0
13104.m05522	LOC_Os04g53620.4	intron_2	456	3906.67	4337.42	3781.5	0	0
13105.m00254	LOC_Os05g02780.3	intron_1	560	109	117	87.75	0	0
13104.m04749	LOC_Os04g46960.4	intron_2	825	151.5	197	145.25	0	0
13101.m00098	LOC_Os01g01710.1	intron_11	854	214	266	197	0	0
13105.m00440	LOC_Os05g04380.2	intron_1	3504	780.5	702	802	0	0
13107.m04664	LOC_Os07g44330.3	intron_4	733	85.6667	91.3333	76.3333	0	0
13111.m04761	LOC_Os11g47760.2	intron_2	102	364.583	378.833	338.167	0	0
13110.m00520	LOC_Os10g05990.2	intron_2	134	1269	1386	1387	0	0
13105.m03512	LOC_Os05g33840.1	intron_4	2567	1148.33	1309.5	1004	0	0
13101.m03749	LOC_Os01g36950.4	intron_1	1736	1286.92	1315.17	1236.33	0	0
13112.m04472	LOC_Os12g42550.2	intron_1	3006	226.5	233.5	158	0	0
13112.m04471	LOC_Os12g42550.1	intron_1	2994	226.5	233.5	158	0	0
13103.m05394	LOC_Os03g49630.2	intron_1	2133	355.5	360.25	278	0	0
13103.m05393	LOC_Os03g49630.1	intron_1	2133	355.5	360.25	278	0	0
13105.m00994	LOC_Os05g08960.2	intron_5	844	261	278.5	186.5	0	0
13109.m01916	LOC_Os09g20240.2	intron_1	469	1032	1052	1150	0	0
13103.m05930	LOC_Os03g54130.1	intron_1	365	101	116	86	0	0
13104.m05839	LOC_Os04g56160.2	intron_2	2311	3145.33	3441	3170.67	0	0
13101.m00708	LOC_Os01g07090.1	intron_7	365	81	80	65	0	0
13104.m03173	LOC_Os04g32950.4	intron_3	79	138	146	140	0	0
13112.m01835	LOC_Os12g17320.1	intron_2	1137	128.5	117	92	0	0
13112.m01835	LOC_Os12g17320.1	intron_3	3781	494.667	567.417	427.667	0	0
13112.m01835	LOC_Os12g17320.1	intron_4	410	76	87	45	0	0
13101.m06427	LOC_Os01g60410.1	intron_1	1200	142.667	171	158.333	0	0
13105.m00619	LOC_Os05g05830.1	intron_2	934	80.5	96.5	57.5	0	1.64937780387815e-313
13104.m05717	LOC_Os04g55180.1	intron_11	728	1533	1704	874	0	0
13102.m12435	LOC_Os02g46260.6	intron_10	911	788	827.25	731.75	0	0
13112.m03651	LOC_Os12g35630.1	intron_2	875	584	626	444	0	0
13102.m05190	LOC_Os02g46260.5	intron_10	543	390.75	402.25	364.75	0	0
13104.m06270	LOC_Os04g59494.2	intron_30	47	608	658	580	0	0
13109.m03150	LOC_Os09g31482.3	intron_1	500	1235	1470	1144.5	0	0
13110.m03231	LOC_Os10g35810.1	intron_1	1520	268.25	277.833	177.5	0	0
13111.m00450	LOC_Os11g04880.1	intron_1	1986	104	100	81.5	0	6.72124116293553e-314
13108.m09399	LOC_Os08g44400.3	intron_10	277	884	896	807	0	0
13105.m00053	LOC_Os05g01280.2	intron_1	677	1367	1450	924	0	0
13103.m05256	LOC_Os03g48626.1	intron_1	4097	1677	1773	1684	0	0
13101.m03149	LOC_Os01g31360.3	intron_10	105	298	322	246	0	0
13103.m03134	LOC_Os03g26820.1	intron_1	1289	177	200	148	0	0
13103.m02006	LOC_Os03g16860.2	intron_2	99	628.25	652	614.333	0	0
13102.m29135	LOC_Os02g39795.1	intron_1	195	291.5	285	285	0	0
13102.m29135	LOC_Os02g39795.1	intron_2	504	803	953	823	0	0
13105.m00620	LOC_Os05g05830.2	intron_2	934	80.5	96.5	57.5	0	1.12436708723035e-313
13106.m02855	LOC_Os06g27760.1	intron_4	707	277	271	142	0	0
13106.m02586	LOC_Os06g24070.1	intron_2	1537	556	543	290	0	0
13112.m00752	LOC_Os12g07210.1	intron_1	510	76	94	71	0	0
13103.m02340	LOC_Os03g19560.1	intron_5	720	164.5	163	102	0	0
13105.m03474	LOC_Os05g33570.1	intron_2	10807	242.167	215.833	184.333	0	0
13101.m14944	LOC_Os01g40630.3	intron_2	751	87.6667	104.333	85.6667	0	0
13104.m05484	LOC_Os04g53310.1	intron_7	420	117	130	97	0	0
13111.m04760	LOC_Os11g47760.6	intron_2	762	6093.92	6636.83	6000.67	0	0
13101.m01401	LOC_Os01g12830.1	intron_1	1800	150.5	172.5	122.5	0	0
13106.m00703	LOC_Os06g06780.1	intron_3	804	188	190.5	58.5	0	0
13103.m02342	LOC_Os03g19560.2	intron_4	1309	1006.83	1164.17	902.333	0	0
13104.m03608	LOC_Os04g37710.1	intron_4	638	127	151	102	0	0
13104.m03608	LOC_Os04g37710.1	intron_5	740	273	299	194	0	0
13101.m04160	LOC_Os01g40630.2	intron_1	629	125	133	130	0	0
13101.m04160	LOC_Os01g40630.2	intron_2	794	72	97.5	76.5	0	0
13101.m04160	LOC_Os01g40630.2	intron_4	751	87.6667	104.333	85.6667	0	0
13104.m05808	LOC_Os04g55920.5	intron_1	2249	277	316.333	283.667	0	0
13101.m07993	LOC_Os01g73234.1	intron_4	956	309	304	174	0	0
13109.m00593	LOC_Os09g07450.1	intron_5	1148	150.333	161	95	0	0
13104.m05848	LOC_Os04g56240.1	intron_3	1484	273.333	324.667	230.833	0	0
13105.m01373	LOC_Os05g12640.4	intron_2	195	322.667	271.333	287.833	0	0
13107.m05061	LOC_Os07g47510.2	intron_3	471	992	967	1027	0	0
13102.m03223	LOC_Os02g29550.2	intron_1	1641	488.167	584.833	432.167	0	0
13106.m04067	LOC_Os06g39240.2	intron_1	189	427	412	503	0	0
13103.m02475	LOC_Os03g20630.3	intron_3	773	278.333	307	268.667	0	0
13101.m07506	LOC_Os01g68860.1	intron_2	373	74	98	60	0	0
13105.m10353	LOC_Os05g12640.6	intron_2	84	82.3333	71	91.6667	0	0
13106.m00645	LOC_Os06g06290.1	intron_3	788	142.5	161.75	110.75	0	0
13101.m06572	LOC_Os01g61670.1	intron_1	540	110	107	101	0	0
13101.m03870	LOC_Os01g37950.1	intron_1	283	1391	1580	1389	0	0
13106.m01384	LOC_Os06g12630.3	intron_3	585	457.333	503.333	400.333	0	0
13105.m03196	LOC_Os05g31140.1	intron_1	3152	169	168.5	136	0	0
13111.m02261	LOC_Os11g23790.2	intron_9	105	236	257	214	0	0
13107.m04114	LOC_Os07g39680.1	intron_2	921	198	228	172	0	0
13111.m04795	LOC_Os11g47980.1	intron_4	90	3376	3741	3225	0	0
13104.m02142	LOC_Os04g23040.2	intron_3	84	59.5	67.5	51.5	0	0
13104.m02142	LOC_Os04g23040.2	intron_4	744	86.6667	87.6667	51	0	3.54156136251922e-319
13106.m04078	LOC_Os06g39344.3	intron_2	1786	163.667	178.833	135.333	0	0
13101.m07508	LOC_Os01g68860.3	intron_2	373	74	98	60	0	0
13102.m05868	LOC_Os02g51570.1	intron_1	234	159	124	101	0	0
13108.m04402	LOC_Os08g41040.1	intron_2	256	63	79	58	0	0
13105.m01371	LOC_Os05g12630.1	intron_1	289	139	121	53	0	0
13101.m04693	LOC_Os01g45750.1	intron_7	1329	303	312	187	0	0
13107.m00866	LOC_Os07g08710.3	intron_1	646	876.667	919.5	873.667	0	0
13108.m00677	LOC_Os08g06630.1	intron_7	265	115	97	46	0	0
13106.m04079	LOC_Os06g39344.2	intron_2	346	104.333	116.833	86	0	0
13110.m02721	LOC_Os10g31330.3	intron_1	123	320.5	365.5	342	0	0
13109.m03091	LOC_Os09g31180.2	intron_1	165	70.5	71	82.5	0	0
13103.m02084	LOC_Os03g17470.1	intron_4	413	85.8333	73.8333	63.5	0	0
13103.m03433	LOC_Os03g29970.1	intron_1	1317	693	657.5	473	0	0
13111.m00170	LOC_Os11g02424.1	intron_1	2795	4332	4672.08	3894.75	0	0
13103.m00272	LOC_Os03g02960.1	intron_1	249	77.5	84.5	84	0	0
13103.m06489	LOC_Os03g59090.1	intron_1	1624	4270	4697.5	4198.5	0	0
13102.m04205	LOC_Os02g38240.1	intron_4	394	63	91	63	0	0
13107.m00003	LOC_Os07g01030.1	intron_4	393	97	125	76	0	0
13107.m00003	LOC_Os07g01030.1	intron_8	284	94	82	65	0	0
13107.m00003	LOC_Os07g01030.1	intron_9	466	109	140	107	0	0
13109.m00616	LOC_Os09g07630.1	intron_1	626	256.75	206.5	231.75	0	0
13104.m02143	LOC_Os04g23040.1	intron_3	744	86.6667	87.6667	51	0	5.10809530578806e-319
13107.m00865	LOC_Os07g08710.2	intron_2	180	222.5	235.5	227	0	0
13106.m01385	LOC_Os06g12630.2	intron_6	1938	1285	1436	843	0	0
13105.m05355	LOC_Os05g49970.3	intron_3	3968	3654.83	4237.83	3486	0	0
13103.m02180	LOC_Os03g18200.1	intron_7	687	207	232	207	0	0
13101.m15064	LOC_Os01g50930.2	intron_2	5877	1294	1506	1134.5	0	0
13107.m04422	LOC_Os07g42370.2	intron_5	1252	116	130	98	0	0
13104.m02144	LOC_Os04g23040.4	intron_2	84	59.5	67.5	51.5	0	0
13104.m02144	LOC_Os04g23040.4	intron_3	744	86.6667	87.6667	51	0	5.93278968182627e-319
13105.m01219	LOC_Os05g11260.2	intron_10	487	349	371	264	0	0
13105.m01219	LOC_Os05g11260.2	intron_13	350	120	139	75	0	0
13105.m01219	LOC_Os05g11260.2	intron_2	112	91.5	97.25	64.5	0	0
13105.m01219	LOC_Os05g11260.2	intron_3	299	356	474	405	0	0
13105.m01219	LOC_Os05g11260.2	intron_5	69	194.25	244	195	0	0
13101.m01943	LOC_Os01g17390.1	intron_4	726	253	223	118	0	0
13102.m05535	LOC_Os02g48900.1	intron_1	2984	302.5	318	247.75	0	0
13107.m04169	LOC_Os07g40130.1	intron_1	702	79	86	77	0	0
13103.m12937	LOC_Os03g09220.6	intron_2	408	175	200.5	175.5	0	0
13102.m03819	LOC_Os02g35180.1	intron_5	241	114.5	112.75	62	0	0
13103.m01066	LOC_Os03g09220.4	intron_2	408	175	200.5	175.5	0	0
13103.m02100	LOC_Os03g17570.5	intron_10	113	408	473	355	0	0
13109.m03562	LOC_Os09g36240.1	intron_14	129	340	382	266	0	0
13103.m02644	LOC_Os03g22010.2	intron_1	512	73	72	78.3333	0	0
13103.m02836	LOC_Os03g23980.1	intron_1	700	121.417	137.667	91.25	0	0
13102.m04599	LOC_Os02g41650.3	intron_2	176	905	1026	886	0	0
13110.m03974	LOC_Os10g42299.3	intron_3	364	343	413.667	313	0	0
13101.m01211	LOC_Os01g11230.2	intron_2	65	47	45	58	0	0
13103.m12933	LOC_Os03g07570.4	intron_9	78	71	94	72	0	0
13105.m05587	LOC_Os05g51700.3	intron_4	1320	288	309	257	0	0
13106.m03180	LOC_Os06g30750.1	intron_1	2377	141	145	110.5	0	0
13103.m01715	LOC_Os03g14669.1	intron_1	1160	923	1007	683	0	0
13103.m02676	LOC_Os03g22270.1	intron_2	1208	174	162	113	0	0
13105.m04324	LOC_Os05g40820.2	intron_6	98	91	86	92	0	0
13109.m03354	LOC_Os09g33680.1	intron_11	283	60	65	58	0	4.32376609301509e-319
13103.m00959	LOC_Os03g08360.3	intron_1	234	446	439	482	0	0
13106.m04145	LOC_Os06g39912.2	intron_1	190	274	327	311	0	0
13102.m05057	LOC_Os02g45120.1	intron_1	2014	331.167	352.5	332.667	0	0
13105.m10376	LOC_Os05g31140.3	intron_1	2626	127	120.5	100	0	0
13103.m00913	LOC_Os03g08070.1	intron_3	414	64.3333	76.3333	75.1667	0	0
13106.m03181	LOC_Os06g30750.2	intron_1	2377	141	145	110.5	0	0
13110.m01838	LOC_Os10g22039.2	intron_1	1745	158.583	152.75	155.167	0	0
13102.m05385	LOC_Os02g47744.4	intron_1	3112	136	167	104	0	0
13103.m00046	LOC_Os03g01300.1	intron_1	2704	632	635.5	651	0	0
13111.m02812	LOC_Os11g29190.5	intron_2	1265	684	763.5	701.5	0	0
13103.m05471	LOC_Os03g50310.1	intron_1	704	172	228	125	0	0
13103.m06516	LOC_Os03g59360.1	intron_1	492	98	108	63	0	0
13104.m11955	LOC_Os04g53240.2	intron_1	108	79.5	82.5	80	0	0
13103.m00915	LOC_Os03g08070.2	intron_3	414	64.3333	76.3333	75.1667	0	0
13103.m01490	LOC_Os03g12910.1	intron_1	1965	105	122	58	0	1.36101379652995e-314
13102.m06755	LOC_Os02g58320.1	intron_2	214	255.75	294.5	272	0	0
13104.m11956	LOC_Os04g53240.3	intron_1	231	108.167	109.167	109	0	0
13110.m02830	LOC_Os10g32400.1	intron_7	74	99	131	89	0	0
13107.m03454	LOC_Os07g33921.1	intron_3	6257	2616.92	2897.17	2217.33	0	0
13101.m03016	LOC_Os01g28989.1	intron_1	400	86	98	65	0	0
13101.m03016	LOC_Os01g28989.1	intron_3	136	95.3333	114	76.6667	0	0
13108.m09389	LOC_Os08g37370.2	intron_1	127	235	288	200	0	0
13103.m07023	LOC_Os03g63370.1	intron_1	3404	174.833	173.667	126.833	0	0
13107.m02802	LOC_Os07g28040.2	intron_1	1580	315.5	373.833	345.5	0	0
13103.m01491	LOC_Os03g12910.2	intron_1	1965	105	122	58	0	7.89850887466507e-315
13101.m05853	LOC_Os01g55510.1	intron_1	184	85	90	69	0	0
13101.m01299	LOC_Os01g12080.1	intron_1	612	117	118	102.5	0	0
13101.m01299	LOC_Os01g12080.1	intron_4	479	107	111	46.5	0	0
13101.m15025	LOC_Os01g28989.5	intron_1	400	86	98	65	0	0
13104.m03752	LOC_Os04g38914.1	intron_1	113	49	69	58	0	0
13106.m04563	LOC_Os06g43590.4	intron_1	111	89	105	87	0	0
13102.m01555	LOC_Os02g13970.2	intron_16	188	358.5	352.5	272	0	0
13112.m00750	LOC_Os12g07190.1	intron_12	248	83	68	60	0	0
13108.m04430	LOC_Os08g41280.1	intron_1	858	122	128	76	0	0
13105.m05462	LOC_Os05g50840.2	intron_7	153	402	423	358	0	0
13103.m02111	LOC_Os03g17660.2	intron_2	1095	266	323	214	0	0
13101.m15024	LOC_Os01g28989.4	intron_1	400	86	98	65	0	0
13105.m25152	LOC_Os05g47545.1	intron_12	125	286	347	300	0	0
13105.m25152	LOC_Os05g47545.1	intron_5	373	180.333	205	170	0	0
13111.m02575	LOC_Os11g26890.1	intron_1	768	79	84.5	78.5	0	0
13105.m04459	LOC_Os05g41930.2	intron_1	211	143.75	140.917	130.083	0	0
13103.m03560	LOC_Os03g31170.2	intron_7	811	422.5	411.5	339.583	0	0
13102.m12348	LOC_Os02g02480.3	intron_5	1369	135	141	121.833	0	0
13105.m02653	LOC_Os05g25850.2	intron_4	1636	357	434.5	347	0	0
13103.m02571	LOC_Os03g21490.1	intron_6	216	254	256	142	0	0
13103.m05960	LOC_Os03g54890.2	intron_4	75	91	113	97	0	0
13103.m01458	LOC_Os03g12700.1	intron_1	717	155	187	85	0	0
13102.m01699	LOC_Os02g15230.1	intron_4	1346	162	211	112	0	0
13103.m05143	LOC_Os03g47740.1	intron_6	623	963	1005	771	0	0
13107.m02803	LOC_Os07g28040.1	intron_1	1393	119.5	130.833	114.5	0	0
13101.m15027	LOC_Os01g28989.6	intron_1	400	86	98	65	0	0
13101.m06034	LOC_Os01g56890.1	intron_3	747	433	467	274	0	0
13101.m06034	LOC_Os01g56890.1	intron_2	960	83	90	66.5	0	1.54800648154979e-319
13105.m02122	LOC_Os05g20050.3	intron_2	345	633	695	656	0	0
13107.m04590	LOC_Os07g43700.1	intron_1	574	188	216	152	0	0
13107.m04260	LOC_Os07g40940.1	intron_2	811	151.333	180.75	153.083	0	0
13103.m00572	LOC_Os03g05390.8	intron_2	174	54.5	68.3333	44.25	0	1.44909453925238e-320
13109.m03043	LOC_Os09g30418.1	intron_3	1126	921	1043	856.5	0	0
13109.m18573	LOC_Os09g30439.1	intron_3	1126	921	1043	856.5	0	0
13101.m07319	LOC_Os01g67370.2	intron_11	312	262.333	289.333	276.333	0	0
13106.m00459	LOC_Os06g04920.2	intron_3	882	106	144	114.5	0	0
13101.m04451	LOC_Os01g43150.3	intron_2	5487	4671.5	5372.83	4452.17	0	0
13103.m06901	LOC_Os03g62510.2	intron_5	225	322	315	279	0	0
13103.m02652	LOC_Os03g22060.1	intron_5	290	92	85	75	0	0
13112.m01719	LOC_Os12g16350.3	intron_1	2836	220.667	226.333	233.667	0	0
13106.m02291	LOC_Os06g21400.1	intron_1	487	754	821	556	0	0
13105.m00145	LOC_Os05g01970.3	intron_8	73	45	61.5	43	0	0
13105.m05283	LOC_Os05g49380.2	intron_8	425	708	766	586	0	0
13101.m06665	LOC_Os01g62290.2	intron_2	102	345.583	383.333	349.333	0	0
13102.m06306	LOC_Os02g55060.2	intron_1	319	1429	1582	1258	0	0
13110.m03141	LOC_Os10g35110.1	intron_15	318	828	915	728	0	0
13101.m06602	LOC_Os01g61814.1	intron_3	3652	2736.5	2979.5	2646	0	0
13103.m03050	LOC_Os03g25940.2	intron_3	264	215	247	208.333	0	0
13103.m01871	LOC_Os03g15890.2	intron_5	322	127.5	124.5	94	0	0
13105.m00146	LOC_Os05g01970.4	intron_8	89	66	76.5	60	0	0
13101.m01300	LOC_Os01g12080.3	intron_1	612	117	118	102.5	0	0
13101.m01300	LOC_Os01g12080.3	intron_4	479	107	111	46.5	0	0
13101.m03940	LOC_Os01g38620.3	intron_1	1241	148.25	147.833	147.75	0	0
13103.m01872	LOC_Os03g15890.1	intron_5	322	127.5	124.5	94	0	0
13101.m15026	LOC_Os01g28989.2	intron_3	136	95.3333	114.667	76.6667	0	0
13111.m01495	LOC_Os11g14544.3	intron_1	3161	247	270.5	262	0	0
13107.m09965	LOC_Os07g48810.2	intron_1	467	122.5	160.5	128	0	0
13106.m04575	LOC_Os06g43660.2	intron_1	129	84	68	67	0	0
13103.m03543	LOC_Os03g31026.1	intron_1	111	104.5	107.833	72	0	0
13111.m01492	LOC_Os11g14544.5	intron_2	2538	132	147.5	128	0	0
13104.m04479	LOC_Os04g44790.1	intron_1	409	209	233	200	0	0
13109.m02350	LOC_Os09g24710.3	intron_4	269	402	440	383	0	0
13104.m03346	LOC_Os04g34460.1	intron_3	437	122	113	64	0	0
13104.m03346	LOC_Os04g34460.1	intron_6	217	106	107	86	0	0
13102.m03351	LOC_Os02g30650.2	intron_2	1230	225.5	244.5	236	0	0
13107.m04694	LOC_Os07g44610.1	intron_1	1250	83.5	105	84	0	0
13108.m04139	LOC_Os08g38910.1	intron_1	2641	404.833	447.333	338	0	0
13110.m03694	LOC_Os10g40030.6	intron_8	380	72	73	78	0	0
13102.m00615	LOC_Os02g05630.1	intron_1	752	137.333	157.833	105.833	0	0
13103.m04087	LOC_Os03g37640.1	intron_6	663	251	308	203	0	0
13104.m02702	LOC_Os04g28520.1	intron_5	641	231.167	270.833	217.5	0	0
13102.m03348	LOC_Os02g30630.2	intron_1	85	133	160	135	0	0
13108.m01987	LOC_Os08g19140.1	intron_7	1737	248.667	260.167	126.5	0	0
13111.m01020	LOC_Os11g09680.2	intron_2	1237	297.333	306.917	202.417	0	0
13105.m05229	LOC_Os05g48960.1	intron_2	1231	312.333	374.667	183.833	0	0
13106.m04568	LOC_Os06g43620.1	intron_3	1162	176	203	153	0	0
13110.m19361	LOC_Os10g32300.1	intron_3	849	110.5	101.5	91.5	0	0
13104.m02385	LOC_Os04g25400.2	intron_12	270	228	236	159	0	0
13101.m01488	LOC_Os01g13540.1	intron_4	783	186	193	110	0	0
13110.m03834	LOC_Os10g41200.1	intron_1	1531	124	147	116	0	0
13101.m05356	LOC_Os01g51360.1	intron_1	1082	302.167	315.167	150	0	0
13103.m12986	LOC_Os03g31026.2	intron_1	111	104.5	107.833	72	0	0
13101.m07379	LOC_Os01g67850.1	intron_4	1642	139.333	161	110	0	0
13101.m15065	LOC_Os01g51360.3	intron_1	1084	302.167	315.167	150	0	0
13103.m02516	LOC_Os03g21000.1	intron_3	495	173	165	84	0	0
13102.m00617	LOC_Os02g05630.2	intron_1	578	75.3333	80.3333	53	0	8.30605647011479e-312
13107.m00760	LOC_Os07g07715.1	intron_2	99	118	112	79	0	0
13108.m00033	LOC_Os08g01270.2	intron_11	390	165	212.667	142.667	0	0
13111.m00638	LOC_Os11g06390.2	intron_5	1040	744	784	670	0	0
13112.m01992	LOC_Os12g18729.1	intron_1	1021	234.25	247.333	221.5	0	0
13105.m02904	LOC_Os05g28200.2	intron_10	232	87.5	110.5	82	0	0
13109.m03184	LOC_Os09g32080.2	intron_3	108	139	157	98	0	0
13107.m02307	LOC_Os07g23520.2	intron_7	1350	154	165	129.5	0	0
13106.m04576	LOC_Os06g43660.3	intron_6	627	1289.67	1457	1156.33	0	0
13101.m03260	LOC_Os01g32350.1	intron_5	101	159	209	185	0	0
13112.m01993	LOC_Os12g18729.2	intron_1	407	99.25	105.333	92.5	0	0
13111.m01019	LOC_Os11g09680.1	intron_3	996	189.333	189.167	131	0	0
13103.m01263	LOC_Os03g11210.1	intron_2	1130	113	137	98	0	0
13101.m15037	LOC_Os01g35789.3	intron_2	763	617.5	711.5	498	0	0
13101.m06017	LOC_Os01g56780.3	intron_1	1496	314	422.833	353.333	0	0
13102.m00616	LOC_Os02g05630.3	intron_1	752	137.333	157.833	105.833	0	0
13103.m12936	LOC_Os03g08500.2	intron_1	173	225	266	242	0	0
13107.m10040	LOC_Os07g44610.4	intron_1	1250	83.5	105	84	0	0
13111.m04469	LOC_Os11g44810.3	intron_1	929	187.5	187.167	195.5	0	0
13102.m04574	LOC_Os02g41470.1	intron_14	118	47	69.5	49.5	0	0
13104.m03066	LOC_Os04g32050.2	intron_7	82	134	166	135	0	0
13101.m01620	LOC_Os01g14690.5	intron_1	1303	143.333	160	150	0	0
13103.m00333	LOC_Os03g03470.3	intron_9	94	54.5	50	52	0	0
13104.m05272	LOC_Os04g51630.2	intron_7	381	300	337	137	0	0
13106.m04794	LOC_Os06g45480.2	intron_8	742	84	87	75.5	0	0
13103.m06148	LOC_Os03g56370.1	intron_1	1517	173	183	145	0	0
13104.m04727	LOC_Os04g46830.2	intron_1	120	107	106	128	0	0
13104.m05891	LOC_Os04g56540.1	intron_4	1123	583	659	441	0	0
13105.m03031	LOC_Os05g29760.2	intron_11	816	657	741	508	0	0
13101.m00885	LOC_Os01g08460.1	intron_10	669	803	900	799	0	0
13101.m00885	LOC_Os01g08460.1	intron_2	674	152	160.5	133.5	0	0
13106.m10479	LOC_Os06g23870.2	intron_2	944	133.5	110	63.5	0	0
13101.m01617	LOC_Os01g14690.3	intron_1	130	50.1667	55.8333	51.5	0	8.6625567223202e-318
13102.m01481	LOC_Os02g13350.1	intron_2	400	97	118	76	0	0
13102.m01481	LOC_Os02g13350.1	intron_3	224	113	130	106	0	0
13101.m07536	LOC_Os01g69050.2	intron_1	1620	403.083	406.25	297.25	0	0
13107.m00906	LOC_Os07g09040.1	intron_7	1583	2020	2294	1846	0	0
13111.m03196	LOC_Os11g32770.1	intron_1	51	428	464	359	0	0
13104.m00016	LOC_Os04g01140.2	intron_1	584	859	891.5	923	0	0
13101.m06956	LOC_Os01g64630.2	intron_3	1571	2005.33	2232.33	1900	0	0
13109.m03202	LOC_Os09g32240.2	intron_2	83	92	111	102	0	0
13104.m11949	LOC_Os04g52164.2	intron_1	2462	130.417	130.333	72.5	0	0
13104.m11949	LOC_Os04g52164.2	intron_2	336	217	199	236	0	0
13104.m11949	LOC_Os04g52164.2	intron_3	162	226	217	246	0	0
13101.m03062	LOC_Os01g29469.1	intron_3	3588	154	141	98	0	0
13101.m07531	LOC_Os01g69030.1	intron_1	74	163	167	143	0	0
13103.m00941	LOC_Os03g08270.5	intron_1	624	96.25	105.5	104.25	0	0
13103.m00941	LOC_Os03g08270.5	intron_2	1195	105.5	121.5	75.75	0	0
13107.m04750	LOC_Os07g45090.2	intron_2	98	206	232	221	0	0
13112.m02197	LOC_Os12g21700.1	intron_6	1075	90	110	89	0	0
13104.m05912	LOC_Os04g56710.1	intron_2	2430	126	139	88	0	0
13107.m02980	LOC_Os07g29640.3	intron_1	1149	93	89	72	0	0
13108.m01493	LOC_Os08g13930.1	intron_2	719	68.5	98.5	87.5	0	0
13105.m05204	LOC_Os05g48800.2	intron_5	68	61	57	51	0	0
13106.m01584	LOC_Os06g14350.2	intron_4	1618	486.75	614	469.25	0	0
13102.m00905	LOC_Os02g07890.3	intron_1	111	285	293	295	0	0
13106.m01345	LOC_Os06g12310.1	intron_4	712	179	203	114	0	0
13106.m03715	LOC_Os06g35970.2	intron_3	96	69	74	83	0	0
13101.m06035	LOC_Os01g56890.2	intron_2	960	83	90	66.5	0	9.5300322426318e-320
13107.m02981	LOC_Os07g29640.1	intron_1	1149	93	89	72	0	0
13110.m19362	LOC_Os10g32348.1	intron_3	849	110.5	101.5	91.5	0	0
13110.m04017	LOC_Os10g42710.1	intron_4	288	80.1667	83.3333	27.8333	0	0
13104.m03739	LOC_Os04g38850.1	intron_2	448	144	143	110	0	0
13103.m00939	LOC_Os03g08270.1	intron_2	1195	105.5	121.5	75.75	0	0
13104.m02281	LOC_Os04g24410.1	intron_3	5127	565	642.333	465.5	0	0
13103.m00942	LOC_Os03g08270.6	intron_1	1696	181.583	203.5	141.333	0	0
13105.m03334	LOC_Os05g32390.2	intron_1	369	209	224	205	0	0
13109.m00487	LOC_Os09g06464.1	intron_1	15025	1205.83	1196.08	940.167	0	0
13105.m03497	LOC_Os05g33700.1	intron_3	2103	520.667	611.333	461.083	0	0
13104.m02703	LOC_Os04g28520.2	intron_5	641	231.167	270.833	217.5	0	0
13104.m02703	LOC_Os04g28520.2	intron_8	2521	1691	2001.67	1563	0	0
13107.m01375	LOC_Os07g13230.1	intron_1	121	112	117	115	0	0
13105.m00929	LOC_Os05g08420.2	intron_1	96	133	105	131	0	0
13103.m00332	LOC_Os03g03470.1	intron_7	580	491.75	585	426	0	0
13103.m00332	LOC_Os03g03470.1	intron_8	239	338.5	398	309	0	0
13104.m01613	LOC_Os04g17700.1	intron_3	5124	507.5	578.333	404.5	0	0
13106.m04212	LOC_Os06g40500.1	intron_1	1818	155.25	193.5	147.333	0	0
13110.m03219	LOC_Os10g35720.2	intron_3	324	427	517	450	0	0
13103.m00943	LOC_Os03g08270.2	intron_1	1900	236.583	265	206.333	0	0
13110.m03244	LOC_Os10g35960.1	intron_16	391	65	78.5	58.5	0	0
13109.m00401	LOC_Os09g04680.1	intron_1	264	794.833	854.833	736.917	0	0
13104.m05340	LOC_Os04g52164.1	intron_1	2462	130.417	130.333	72.5	0	0
13102.m12384	LOC_Os02g15550.2	intron_9	440	73.5	99	58.5	0	0
13105.m03086	LOC_Os05g30250.2	intron_4	442	74.5	85	57.5	0	0
13102.m12388	LOC_Os02g20540.2	intron_1	205	171	171	181	0	0
13104.m05467	LOC_Os04g53190.2	intron_1	490	234.5	248.5	246.5	0	0
13103.m02976	LOC_Os03g25270.2	intron_1	1280	173.25	141.333	142.833	0	0
13101.m07112	LOC_Os01g65780.4	intron_1	2637	159.5	175.333	142.333	0	0
13109.m03079	LOC_Os09g31080.4	intron_2	201	109.5	98.5	117.5	0	0
13104.m05681	LOC_Os04g54870.2	intron_1	1272	228	228	138	0	0
13112.m00871	LOC_Os12g08260.6	intron_7	125	61	75	50	0	0
13103.m12952	LOC_Os03g12840.2	intron_9	296	114	130.5	92.5	0	0
13112.m08899	LOC_Os12g08260.7	intron_2	163	60	61	48	0	0
13112.m08899	LOC_Os12g08260.7	intron_7	125	61	75	50	0	0
13107.m04022	LOC_Os07g38850.1	intron_4	764	340	372	311	0	0
13107.m04022	LOC_Os07g38850.1	intron_6	1330	318.25	283	174.25	0	0
13102.m03345	LOC_Os02g30624.1	intron_3	94	84	76	71	0	0
13102.m04394	LOC_Os02g39630.2	intron_6	107	204	224	169	0	0
13112.m01123	LOC_Os12g10600.1	intron_1	264	795.833	854.833	737.917	0	0
13112.m01123	LOC_Os12g10600.1	intron_2	129	385	462.5	377	0	0
13112.m01123	LOC_Os12g10600.1	intron_3	229	1497	1593	1292	0	0
13103.m03153	LOC_Os03g27010.1	intron_2	145	170	206	152	0	0
13102.m06627	LOC_Os02g57410.10	intron_1	1335	148	167	138	0	0
13103.m01639	LOC_Os03g14030.1	intron_2	803	125	158	131	0	0
13104.m11906	LOC_Os04g38640.3	intron_7	2845	407.667	461.5	362.833	0	0
13110.m03697	LOC_Os10g40030.10	intron_6	429	101	130	103	0	0
13103.m01958	LOC_Os03g16470.2	intron_2	759	668	686.333	405.333	0	0
13103.m00240	LOC_Os03g02690.2	intron_10	108	58.6667	56.3333	43.3333	0	0
13103.m03255	LOC_Os03g27840.1	intron_3	204	72	74.3333	59.5	0	0
13103.m03255	LOC_Os03g27840.1	intron_8	308	274	295	217	0	0
13106.m01698	LOC_Os06g15360.4	intron_10	597	165	171.25	154.5	0	0
13107.m10031	LOC_Os07g41750.3	intron_1	493	486	486	453	0	0
13103.m01704	LOC_Os03g14570.2	intron_1	216	299	328	264	0	0
13112.m03303	LOC_Os12g32380.1	intron_2	2909	979	999	723.25	0	0
13103.m02727	LOC_Os03g22634.1	intron_10	2462	702.333	758.667	554.5	0	0
13103.m02727	LOC_Os03g22634.1	intron_2	976	153	174	149	0	0
13101.m02704	LOC_Os01g25520.1	intron_1	91	197	241	215	0	0
13105.m03252	LOC_Os05g31680.1	intron_2	823	400	422	209	0	0
13110.m01083	LOC_Os10g11889.2	intron_1	2063	185.5	165.083	133.167	0	0
13101.m07538	LOC_Os01g69050.1	intron_1	917	107.917	112.917	70.9167	0	0
13105.m02990	LOC_Os05g28980.5	intron_4	133	145	152	152	0	0
13103.m06379	LOC_Os03g58070.1	intron_1	1147	268	271	140	0	0
13106.m02566	LOC_Os06g23870.1	intron_3	815	150.25	134.333	55	0	0
13106.m02566	LOC_Os06g23870.1	intron_5	944	133.5	110	63.5	0	0
13103.m05317	LOC_Os03g49150.2	intron_2	2393	119.5	136.5	109.5	0	0
13103.m01626	LOC_Os03g13970.1	intron_10	371	233	304	226	0	0
13103.m05624	LOC_Os03g51650.1	intron_9	1462	109	128	85	0	0
13110.m07833	LOC_Os10g35150.2	intron_1	802	138	130	152.5	0	0
13101.m05495	LOC_Os01g52500.4	intron_1	1080	90	101.25	84.25	0	0
13102.m01358	LOC_Os02g12480.8	intron_3	937	267.583	286.583	264.667	0	0
13103.m01886	LOC_Os03g15960.2	intron_1	42	66	63	60	0	0
13107.m09993	LOC_Os07g13234.2	intron_2	294	208	222.75	173	0	0
13102.m29140	LOC_Os02g47225.1	intron_13	278	122	136	121	0	0
13102.m29140	LOC_Os02g47225.1	intron_14	426	615	642	591	0	0
13101.m05305	LOC_Os01g50934.1	intron_2	788	124	149	109	0	0
13101.m07537	LOC_Os01g69050.3	intron_1	917	107.917	112.917	70.9167	0	0
13101.m07537	LOC_Os01g69050.3	intron_7	122	299	323	288	0	0
13112.m01121	LOC_Os12g10580.1	intron_1	82	373	448	355	0	0
13112.m01121	LOC_Os12g10580.1	intron_2	176	1720.5	1874	1466	0	0
13112.m01121	LOC_Os12g10580.1	intron_3	108	730	842	736	0	0
13112.m01121	LOC_Os12g10580.1	intron_4	316	3029	2772	1726	0	0
13112.m01121	LOC_Os12g10580.1	intron_5	1758	123.833	121.75	60	0	0
13103.m01434	LOC_Os03g12530.1	intron_1	1986	299	287	224	0	0
13112.m01706	LOC_Os12g16220.3	intron_1	4053	382.5	387	284	0	0
13112.m08906	LOC_Os12g17830.3	intron_4	858	387	473	369	0	0
13102.m01355	LOC_Os02g12480.2	intron_2	2257	451.167	496.167	421.667	0	0
13110.m03667	LOC_Os10g39810.2	intron_1	1708	253.5	243.5	259	0	0
13110.m01966	LOC_Os10g23180.2	intron_3	5786	459.333	507.167	407.167	0	0
13101.m02437	LOC_Os01g22990.1	intron_1	2210	157	169	125	0	0
13106.m03964	LOC_Os06g38320.1	intron_8	563	381	386.5	140	0	0
13102.m05123	LOC_Os02g45670.1	intron_7	988	193	201	135	0	0
13104.m04974	LOC_Os04g48800.3	intron_1	870	116.583	137	120.333	0	0
13109.m03508	LOC_Os09g35790.3	intron_1	3084	1026.17	1179.5	1049.17	0	0
13103.m01905	LOC_Os03g16110.1	intron_4	120	98	88	64	0	0
13103.m07073	LOC_Os03g63770.1	intron_1	1709	111.5	102.167	79.6667	0	0
13104.m04972	LOC_Os04g48800.2	intron_1	852	114.25	133	116	0	0
13103.m07072	LOC_Os03g63770.6	intron_2	1399	110	100.167	77.1667	0	0
13107.m03223	LOC_Os07g31850.1	intron_1	619	95	109	76	0	0
13109.m02612	LOC_Os09g26960.1	intron_1	727	102	124	79	0	0
13102.m06309	LOC_Os02g55080.1	intron_2	1332	108	105	104	0	0
13102.m01352	LOC_Os02g12480.4	intron_3	892	262.583	284.583	263.667	0	0
13104.m04973	LOC_Os04g48800.1	intron_1	870	116.583	137	120.333	0	0
13101.m07185	LOC_Os01g66360.1	intron_1	1012	249.5	228.333	215.167	0	0
13101.m02277	LOC_Os01g21420.1	intron_10	385	94	103	92	0	0
13101.m02277	LOC_Os01g21420.1	intron_13	103	77	102	74	0	0
13101.m02277	LOC_Os01g21420.1	intron_14	848	712	772	474	0	0
13108.m03811	LOC_Os08g36320.2	intron_1	406	111	128.75	104.75	0	0
13104.m11885	LOC_Os04g27250.4	intron_1	702	326.5	372.75	281.833	0	0
13104.m11885	LOC_Os04g27250.4	intron_4	224	153	176.5	152	0	0
13106.m04254	LOC_Os06g40818.1	intron_1	3486	449.917	459.583	300.5	0	0
13104.m02576	LOC_Os04g27250.1	intron_1	702	326.5	372.75	281.833	0	0
13102.m06744	LOC_Os02g58230.2	intron_1	1501	397.5	472	450	0	0
13105.m03399	LOC_Os05g32970.1	intron_1	2912	244.833	257.083	226.5	0	0
13102.m03487	LOC_Os02g32250.2	intron_1	2477	824	989	639	0	0
13104.m11884	LOC_Os04g27250.2	intron_1	702	326.5	372.75	281.833	0	0
13110.m01893	LOC_Os10g22560.2	intron_1	668	115	108	72	0	0
13110.m01894	LOC_Os10g22560.3	intron_1	846	200	202	153.5	0	0
13109.m01855	LOC_Os09g19734.1	intron_6	1668	305	309.5	266	0	0
13103.m06919	LOC_Os03g62610.1	intron_4	351	154	198	143	0	0
13105.m00220	LOC_Os05g02520.3	intron_1	1461	363	410	387	0	0
13104.m04975	LOC_Os04g48800.4	intron_1	870	116.583	137	120.333	0	0
13101.m05083	LOC_Os01g48930.2	intron_1	695	129	107	120.5	0	0
13101.m01425	LOC_Os01g13030.1	intron_5	989	477	528	391	0	0
13101.m02751	LOC_Os01g25990.3	intron_11	2664	1380	1567.58	1099.5	0	0
13104.m04162	LOC_Os04g42250.3	intron_3	166	327	268	262	0	0
13112.m00405	LOC_Os12g04260.1	intron_9	614	361.667	335.333	210.667	0	0
13102.m05273	LOC_Os02g46920.1	intron_2	1994	641.333	618.333	513	0	0
13102.m05273	LOC_Os02g46920.1	intron_3	223	80	74	53	0	0
13111.m02871	LOC_Os11g29720.1	intron_1	1566	119.5	119.5	69	0	0
13108.m01020	LOC_Os08g09690.2	intron_5	295	333	376	307	0	0
13106.m02620	LOC_Os06g24404.2	intron_3	2827	296	291.5	213.5	0	0
13109.m01858	LOC_Os09g19734.2	intron_6	1668	305	309.5	266	0	0
13101.m07305	LOC_Os01g67320.1	intron_1	1421	306	284	292	0	0
13101.m07305	LOC_Os01g67320.1	intron_4	519	437	502	422	0	0
13112.m04634	LOC_Os12g43950.2	intron_1	1404	241.5	262.833	238.667	0	0
13103.m01881	LOC_Os03g15930.2	intron_8	89	79	88	63	0	0
13102.m05767	LOC_Os02g50810.1	intron_2	820	119.667	110.583	98.5	0	0
13101.m03205	LOC_Os01g31870.1	intron_12	1792	166.333	175.667	86.3333	0	0
13107.m03446	LOC_Os07g33860.1	intron_2	4559	2307.5	2530.83	2025	0	0
13112.m03242	LOC_Os12g31850.4	intron_1	1490	121	113.167	95.5	0	0
13103.m06050	LOC_Os03g55600.1	intron_8	849	160	195	126	0	0
13101.m06734	LOC_Os01g62810.4	intron_6	1366	213	261	219	0	0
13101.m03623	LOC_Os01g35789.1	intron_1	625	1188.5	1258	781	0	0
13110.m03824	LOC_Os10g41100.1	intron_1	1408	136	130	109	0	0
13105.m03839	LOC_Os05g36994.1	intron_2	392	168.5	187	127	0	0
13105.m05560	LOC_Os05g51530.1	intron_11	81	60	76	67	0	0
13102.m00345	LOC_Os02g03580.2	intron_10	638	252	310.333	239	0	0
13110.m07775	LOC_Os10g21196.1	intron_1	879	2267.5	2171.5	1061	0	0
13104.m01854	LOC_Os04g20164.1	intron_1	1608	275.5	279.5	172	0	0
13107.m03383	LOC_Os07g33300.2	intron_1	1036	258.333	223.833	133	0	0
13103.m06681	LOC_Os03g60820.1	intron_2	638	87	75	69	0	0
13103.m06681	LOC_Os03g60820.1	intron_5	2002	120	138	128	0	0
13106.m00919	LOC_Os06g08740.1	intron_1	1626	588	631	463	0	0
13104.m03022	LOC_Os04g31630.1	intron_1	1184	341.5	354	292.5	0	0
13105.m03548	LOC_Os05g34170.3	intron_4	136	851	900	850	0	0
13111.m04697	LOC_Os11g47370.1	intron_2	262	65	75	65	0	0
13112.m00599	LOC_Os12g05900.1	intron_3	365	82	97	62	0	0
13107.m02312	LOC_Os07g23550.2	intron_2	109	56	54	48	0	0
13107.m01824	LOC_Os07g17390.1	intron_3	641	130	97	59	0	0
13110.m02368	LOC_Os10g28020.2	intron_1	3621	240.25	242.583	146.583	0	0
13102.m05300	LOC_Os02g47120.1	intron_5	546	85	103	86	0	0
13109.m03509	LOC_Os09g35790.1	intron_2	2014	427	495.5	380.5	0	0
13110.m02367	LOC_Os10g28020.1	intron_1	3621	240.25	242.583	146.583	0	0
13109.m00797	LOC_Os09g09320.1	intron_2	566	286	313	218	0	0
13106.m02501	LOC_Os06g23290.6	intron_4	516	376	410	337	0	0
13101.m00583	LOC_Os01g05970.1	intron_1	12939	1820.83	1867	1755.58	0	0
13106.m00996	LOC_Os06g09320.1	intron_1	79	64	64	40	0	0
13103.m02708	LOC_Os03g22490.4	intron_2	457	319.333	298	309.333	0	0
13101.m07434	LOC_Os01g68320.1	intron_8	1263	304.833	342.333	229.667	0	0
13103.m06486	LOC_Os03g59060.2	intron_11	130	117	129	83	0	0
13101.m08082	LOC_Os01g73980.2	intron_1	706	960	1010	939	0	0
13103.m06787	LOC_Os03g61620.1	intron_1	483	113	99.5	120	0	0
13107.m01960	LOC_Os07g18720.1	intron_14	585	93	104	47	0	0
13110.m02370	LOC_Os10g28020.4	intron_1	3621	240.25	242.583	146.583	0	0
13108.m03443	LOC_Os08g33110.1	intron_1	198	158	162	138	0	0
13104.m05973	LOC_Os04g57210.1	intron_4	167	73	73	45	0	0
13110.m02369	LOC_Os10g28020.3	intron_1	3541	239.25	242.25	146.25	0	0
13101.m07437	LOC_Os01g68320.2	intron_8	1263	304.833	342.333	229.667	0	0
13102.m00220	LOC_Os02g02720.2	intron_7	124	81	92	72.5	0	0
13102.m06067	LOC_Os02g53180.1	intron_1	1907	292.083	318.417	256.333	0	0
13105.m04956	LOC_Os05g46460.4	intron_9	211	112.5	133.5	90.5	0	0
13102.m06066	LOC_Os02g53180.3	intron_1	1827	261.083	287.417	227.833	0	0
13102.m03425	LOC_Os02g31290.2	intron_1	886	128	128	115	0	0
13101.m07436	LOC_Os01g68320.4	intron_8	1120	259	293.333	185.667	0	0
13105.m05470	LOC_Os05g50890.3	intron_4	762	124	136.667	81.6667	0	0
13101.m03211	LOC_Os01g31870.3	intron_1	135	109	118	82	0	0
13107.m04065	LOC_Os07g39270.1	intron_2	355	493	589	284	0	0
13107.m05082	LOC_Os07g47630.1	intron_11	976	245	234	173	0	0
13103.m00895	LOC_Os03g07990.1	intron_2	302	70	72	63	0	0
13103.m12976	LOC_Os03g21664.2	intron_1	623	1041	1186	902	0	0
13112.m01127	LOC_Os12g10630.1	intron_2	891	264	332	253	0	0
13101.m02742	LOC_Os01g25920.2	intron_1	1347	102.667	112.083	61.0833	0	0
13101.m02742	LOC_Os01g25920.2	intron_3	191	55.8333	64.6667	55.1667	0	0
13101.m01514	LOC_Os01g13740.2	intron_2	2816	91.5	120.5	113	0	0
13104.m02390	LOC_Os04g25440.2	intron_1	1212	1063.5	1192.5	1087	0	0
13101.m02800	LOC_Os01g26970.2	intron_4	1146	124.667	116.167	94.5	0	0
13110.m04023	LOC_Os10g42720.1	intron_12	746	197	218	123	0	0
13103.m01471	LOC_Os03g12810.1	intron_4	786	78	91	64	0	0
13112.m01919	LOC_Os12g18110.3	intron_8	2461	181.833	180	89	0	0
13106.m04398	LOC_Os06g42060.1	intron_1	1109	787.5	822	687.5	0	0
13101.m05510	LOC_Os01g52640.3	intron_4	640	108	119	91	0	0
13101.m05510	LOC_Os01g52640.3	intron_5	525	148	163	94	0	0
13112.m00078	LOC_Os12g01620.1	intron_1	2117	235.417	227.25	154.833	0	0
13104.m06215	LOC_Os04g59000.1	intron_9	1519	325	302	212	0	0
13112.m01918	LOC_Os12g18110.2	intron_8	2458	181.833	180	89	0	0
13101.m00831	LOC_Os01g08020.1	intron_10	16221	3362.75	3836.08	3158	0	0
13111.m02739	LOC_Os11g28480.1	intron_1	2620	1620	1820	1806	0	0
13107.m02209	LOC_Os07g22640.4	intron_8	4344	134.75	150.25	108	0	0
13101.m02743	LOC_Os01g25920.3	intron_1	1347	102.667	112.083	61.0833	0	0
13104.m00199	LOC_Os04g02820.3	intron_3	457	426	456	436	0	0
13106.m03129	LOC_Os06g30310.1	intron_10	812	151.917	142.5	144	0	0
13106.m03129	LOC_Os06g30310.1	intron_32	577	219	220	182	0	0
13106.m03129	LOC_Os06g30310.1	intron_6	473	84	105	87	0	0
13112.m01712	LOC_Os12g16280.1	intron_10	793	129.5	147	117.5	0	0
13112.m01712	LOC_Os12g16280.1	intron_7	1666	172	154.333	75	0	0
13112.m01712	LOC_Os12g16280.1	intron_5	866	87.6667	82.6667	61.3333	0	1.93835579194033e-316
13104.m05535	LOC_Os04g53690.1	intron_1	1029	179	182	140	0	0
13101.m04463	LOC_Os01g43230.3	intron_3	509	281	314.5	247.5	0	0
13103.m06862	LOC_Os03g62170.2	intron_8	134	53	55	52	0	4.34777768340297e-322
13104.m04067	LOC_Os04g41460.1	intron_3	1002	165	195	100	0	0
13103.m03881	LOC_Os03g34300.2	intron_5	214	120.5	119.5	112.5	0	0
13104.m03203	LOC_Os04g33210.1	intron_8	470	189	219	181	0	0
13104.m03420	LOC_Os04g35190.1	intron_5	1576	328.583	356.167	248.75	0	0
13101.m05018	LOC_Os01g48380.2	intron_9	445	220	239	176	0	0
13101.m03212	LOC_Os01g31870.6	intron_9	1792	166.333	175.667	86.3333	0	0
13102.m12458	LOC_Os02g53060.2	intron_3	1238	277	319	271.5	0	0
13111.m00613	LOC_Os11g06170.2	intron_2	1751	116	103	60	0	8.53379827435752e-319
13103.m03213	LOC_Os03g27450.2	intron_1	1184	166	172.5	152	0	0
13101.m03207	LOC_Os01g31870.7	intron_9	1994	343.333	368.667	213.333	0	0
13112.m00361	LOC_Os12g03899.3	intron_17	110	85.5	98.5	90	0	0
13101.m06640	LOC_Os01g62070.2	intron_5	1876	966.5	1108	899.5	0	0
13105.m05158	LOC_Os05g48450.2	intron_1	94	98.0833	93.0833	93.6667	0	0
13111.m00535	LOC_Os11g05540.1	intron_1	1930	133	134	72	0	0
13109.m03407	LOC_Os09g34000.1	intron_5	520	97	100	67	0	0
13102.m05737	LOC_Os02g50560.2	intron_13	1088	148	153.5	134	0	0
13102.m06563	LOC_Os02g57060.1	intron_3	417	136	162	133.25	0	0
13103.m03555	LOC_Os03g31150.2	intron_3	439	95	95	45.5	0	0
13110.m03477	LOC_Os10g38110.1	intron_1	1637	181	148	91	0	0
13103.m06154	LOC_Os03g56420.1	intron_2	1808	97	120	64	0	3.21043362601996e-318
13102.m06270	LOC_Os02g54770.1	intron_6	114	119	114	52	0	0
13101.m04462	LOC_Os01g43230.2	intron_3	506	281	314.5	247.5	0	0
13104.m04353	LOC_Os04g43760.2	intron_2	1101	2959	2739	2858.5	0	0
13104.m04183	LOC_Os04g42420.2	intron_1	3382	677.5	793	601	0	0
13101.m05180	LOC_Os01g49770.1	intron_2	1730	95	121	90	0	0
13108.m04570	LOC_Os08g42420.4	intron_5	627	119.5	142.75	135.5	0	0
13103.m06600	LOC_Os03g60130.2	intron_2	205	227	262	142	0	0
13104.m11746	LOC_Os04g16748.1	intron_1	828	589	611.333	342.333	0	0
13110.m07702	LOC_Os10g21238.1	intron_1	828	589	611.333	342.333	0	0
13110.m07798	LOC_Os10g38272.1	intron_1	828	589	611.333	342.333	0	0
13110.m03666	LOC_Os10g39800.1	intron_7	1101	617	746	581	0	0
13103.m02857	LOC_Os03g24184.1	intron_1	974	91	120	68	0	0
13103.m02042	LOC_Os03g17084.1	intron_1	1010	929.667	1083	944.333	0	0
13103.m02042	LOC_Os03g17084.1	intron_2	1993	593.667	672.667	500.667	0	0
13109.m03160	LOC_Os09g31506.1	intron_3	1271	128.667	153.583	125.833	0	0
13102.m05013	LOC_Os02g44780.1	intron_1	2095	259	298	188	0	0
13110.m01506	LOC_Os10g18340.2	intron_1	222	98	98	110	0	0
13101.m07965	LOC_Os01g73000.2	intron_12	203	136	173	126	0	0
13103.m06926	LOC_Os03g62640.2	intron_10	885	258.333	277.667	198.333	0	0
13103.m03700	LOC_Os03g32499.1	intron_2	18052	427	450.417	438.083	0	0
13101.m14990	LOC_Os01g07310.4	intron_5	655	244.917	241.25	199.667	0	0
13108.m00013	LOC_Os08g01090.2	intron_1	793	183	198	195.5	0	0
13110.m00266	LOC_Os10g03550.2	intron_1	1393	283.5	290	223	0	0
13110.m00265	LOC_Os10g03550.1	intron_1	1387	282.5	289	223	0	0
13107.m04270	LOC_Os07g41080.1	intron_2	599	182	208	177	0	0
13107.m04270	LOC_Os07g41080.1	intron_9	1332	953	1140	840	0	0
13107.m03838	LOC_Os07g37310.1	intron_1	611	75	81	70	0	0
13101.m00249	LOC_Os01g03020.2	intron_3	776	126.5	156.5	114.5	0	0
13102.m00221	LOC_Os02g02720.1	intron_6	124	81	92	72.5	0	0
13103.m05195	LOC_Os03g48150.1	intron_2	619	231	200	244	0	0
13109.m03535	LOC_Os09g35990.1	intron_2	1428	118	110	93	0	0
13104.m06101	LOC_Os04g58160.1	intron_2	3665	187	217.5	203.25	0	0
13104.m11971	LOC_Os04g58160.3	intron_2	3665	187	217.5	203.25	0	0
13101.m06681	LOC_Os01g62420.2	intron_4	1745	272	292.25	237.75	0	0
13110.m03280	LOC_Os10g36260.3	intron_1	415	184.333	208.833	157.167	0	0
13109.m02790	LOC_Os09g28310.1	intron_2	841	98.3333	100.667	73	0	0
13102.m01267	LOC_Os02g11740.2	intron_4	688	147.5	175	132.5	0	0
13103.m01932	LOC_Os03g16220.4	intron_1	1030	93	84	90	0	0
13111.m09220	LOC_Os11g16410.5	intron_8	1149	114.25	133.333	113.333	0	0
13108.m00116	LOC_Os08g01840.1	intron_2	534	111	84	71	0	0
13101.m07205	LOC_Os01g66580.1	intron_5	231	95	123	98	0	0
13101.m07205	LOC_Os01g66580.1	intron_7	227	94	102	82	0	0
13111.m02338	LOC_Os11g24540.1	intron_14	199	170	163	119	0	0
13110.m03777	LOC_Os10g40740.1	intron_2	1960	265.167	242.167	147.25	0	0
13108.m00208	LOC_Os08g02640.5	intron_2	109	80.6667	87.3333	77.8333	0	0
13110.m01880	LOC_Os10g22430.2	intron_2	469	272	358	274	0	0
13108.m00205	LOC_Os08g02640.2	intron_2	116	90.6667	106.333	87.8333	0	0
13105.m05501	LOC_Os05g51140.1	intron_2	2683	329	344	263.5	0	0
13109.m02237	LOC_Os09g23650.1	intron_7	655	783	922	776	0	0
13103.m06675	LOC_Os03g60780.2	intron_3	415	142.5	139	125	0	0
13104.m05533	LOC_Os04g53680.1	intron_1	2046	174.417	185.833	135.833	0	0
13104.m03274	LOC_Os04g33780.2	intron_1	1380	455.5	433	419.5	0	0
13109.m03877	LOC_Os09g38790.3	intron_6	1370	294	316	209	0	0
13107.m04780	LOC_Os07g45350.2	intron_11	95	74	98	64	0	0
13103.m01603	LOC_Os03g13810.2	intron_1	989	233	257	182	0	0
13103.m01300	LOC_Os03g11520.1	intron_10	1504	287.5	253.5	131.5	0	0
13103.m01602	LOC_Os03g13810.1	intron_1	983	233	257	182	0	0
13102.m06714	LOC_Os02g58010.1	intron_1	534	417	447	339	0	0
13110.m00169	LOC_Os10g02630.1	intron_6	1628	516	541	329	0	0
13107.m02344	LOC_Os07g23810.1	intron_1	503	79.8333	94.4167	78.5	0	0
13107.m02344	LOC_Os07g23810.1	intron_2	378	107.75	115.083	96.1667	0	0
13107.m02344	LOC_Os07g23810.1	intron_6	138	71.5	64.5	63	0	0
13103.m05689	LOC_Os03g52239.3	intron_1	3005	566.5	495.5	548.5	0	0
13103.m00357	LOC_Os03g03660.3	intron_1	607	188.667	167	164.333	0	0
13108.m04062	LOC_Os08g38300.2	intron_1	261	413.75	416.083	420.417	0	0
13102.m01775	LOC_Os02g15880.3	intron_3	301	233	241	221	0	0
13107.m05169	LOC_Os07g48340.1	intron_1	1940	970	1109.83	903.5	0	0
13106.m03440	LOC_Os06g33330.1	intron_1	869	97	95	70	0	0
13107.m00636	LOC_Os07g06644.1	intron_1	951	257	280	78	0	0
13101.m07042	LOC_Os01g65210.1	intron_4	1583	250	329	217	0	0
13108.m01917	LOC_Os08g17980.1	intron_2	174	218.333	233.333	208.667	0	0
13110.m03724	LOC_Os10g40200.1	intron_3	204	98	78	52	0	0
13102.m00627	LOC_Os02g05700.1	intron_2	187	72	103	81	0	0
13111.m00319	LOC_Os11g03760.1	intron_1	3123	387.667	378.5	220.5	0	0
13110.m03225	LOC_Os10g35770.1	intron_1	2140	640.667	707.5	442.5	0	0
13111.m00590	LOC_Os11g05990.2	intron_7	1578	292.833	302.833	171.667	0	0
13109.m00137	LOC_Os09g02214.3	intron_9	101	108	127	108	0	0
13110.m03227	LOC_Os10g35770.2	intron_2	1823	600	668.5	398	0	0
13108.m04619	LOC_Os08g42740.3	intron_15	90	56	37	54	0	4.74115240477582e-316
13104.m05673	LOC_Os04g54800.3	intron_5	345	102	96.3333	81.6667	0	0
13105.m04047	LOC_Os05g38560.1	intron_1	144	65	82	66	0	0
13102.m29152	LOC_Os02g58260.1	intron_3	268	96	82.5	85	0	0
13102.m04566	LOC_Os02g40900.1	intron_2	1229	146.5	194	136.5	0	0
13103.m05497	LOC_Os03g50530.2	intron_1	1577	111	137	124.5	0	0
13101.m00436	LOC_Os01g04730.1	intron_1	529	172	192	160	0	0
13103.m05068	LOC_Os03g47070.2	intron_2	759	152.5	177.5	130.5	0	0
13108.m00725	LOC_Os08g07080.1	intron_2	545	140	90	15	0	0
13108.m00725	LOC_Os08g07080.1	intron_4	1298	232.5	192.5	47	0	0
13101.m05567	LOC_Os01g53150.1	intron_4	283	125	119	115	0	0
13101.m01045	LOC_Os01g09770.1	intron_1	1174	94	100	65	0	0
13102.m12438	LOC_Os02g47440.3	intron_1	1631	112.167	104.167	89.6667	0	0
13102.m05014	LOC_Os02g44780.2	intron_1	458	252	284.5	182	0	0
13103.m02514	LOC_Os03g20980.1	intron_2	1872	121	121	74	0	0
13101.m00945	LOC_Os01g08890.1	intron_1	15924	408.917	519.333	350	0	0
13103.m01810	LOC_Os03g15460.1	intron_2	318	75	83	60	0	0
13102.m06089	LOC_Os02g53330.1	intron_10	1005	176	160	83	0	0
13108.m03333	LOC_Os08g32100.1	intron_1	1042	168	166	98	0	0
13103.m07094	LOC_Os03g63910.1	intron_1	673	397	435	358	0	0
13105.m00760	LOC_Os05g07030.3	intron_3	2265	311.667	368.333	302	0	0
13105.m00760	LOC_Os05g07030.3	intron_4	3747	753.333	803.333	596	0	0
13111.m02461	LOC_Os11g25780.1	intron_1	8110	564.5	620	528	0	0
13106.m00105	LOC_Os06g01934.1	intron_1	4693	225.333	263.083	143.417	0	0
13102.m00310	LOC_Os02g03294.1	intron_1	1035	118	109	96	0	0
13107.m02345	LOC_Os07g23810.2	intron_1	503	79.8333	94.4167	78.5	0	0
13107.m02345	LOC_Os07g23810.2	intron_2	378	107.75	115.083	96.1667	0	0
13105.m25155	LOC_Os05g26890.1	intron_1	539	72.8333	72.3333	67	0	0
13109.m00592	LOC_Os09g07440.1	intron_2	154	78	68	80	0	0
13109.m00592	LOC_Os09g07440.1	intron_4	942	836.5	970	687.5	0	0
13111.m09189	LOC_Os11g03470.4	intron_1	182	69	65	46	0	0
13103.m00359	LOC_Os03g03660.1	intron_8	274	176	192	135	0	0
13104.m05077	LOC_Os04g49670.1	intron_1	1717	393	417	383	0	0
13108.m03650	LOC_Os08g34879.1	intron_4	1377	400	438	337	0	0
13108.m03650	LOC_Os08g34879.1	intron_5	868	120.25	129.333	60	0	0
13102.m03733	LOC_Os02g34470.1	intron_3	5165	1080.75	1217.17	932.25	0	0
13103.m00670	LOC_Os03g06139.1	intron_8	4527	157	170	138.5	0	0
13102.m01396	LOC_Os02g12760.1	intron_2	1192	110	107	53	0	0
13108.m03964	LOC_Os08g37605.2	intron_6	679	151	172	125	0	0
13111.m00899	LOC_Os11g08530.1	intron_5	85	159	149	123	0	0
13104.m06265	LOC_Os04g59450.3	intron_1	559	184	210	212	0	0
13105.m04814	LOC_Os05g45350.2	intron_9	281	200	221	92	0	0
13107.m02347	LOC_Os07g23810.4	intron_1	503	81.1667	97.75	79.5	0	0
13107.m02347	LOC_Os07g23810.4	intron_2	378	107.75	115.083	96.1667	0	0
13106.m02131	LOC_Os06g19970.1	intron_3	623	82.8333	92.5	56.8333	0	0
13102.m01454	LOC_Os02g13130.1	intron_6	1788	744	786	465.5	0	0
13108.m09351	LOC_Os08g12449.6	intron_2	4266	200.333	229.417	143.75	0	0
13112.m00360	LOC_Os12g03899.4	intron_18	110	85.5	98.5	90	0	0
13112.m00360	LOC_Os12g03899.4	intron_2	8727	149.75	168.5	159.667	0	0
13108.m00587	LOC_Os08g05910.2	intron_1	1142	343	305	356	0	0
13110.m03015	LOC_Os10g33960.4	intron_12	2507	721	676.667	584.667	0	0
13103.m04869	LOC_Os03g45194.1	intron_13	1311	263	244	143	0	0
13103.m01192	LOC_Os03g10620.3	intron_2	2336	139	165.5	134	0	0
13104.m04443	LOC_Os04g44530.3	intron_1	731	154	173.333	128.25	0	0
13110.m02870	LOC_Os10g32770.2	intron_2	1505	211.5	196.5	133.5	0	0
13108.m03444	LOC_Os08g33120.1	intron_2	985	154	167	138	0	0
13112.m08888	LOC_Os12g04204.4	intron_1	494	98.5	99.9167	92.6667	0	0
13101.m15085	LOC_Os01g58790.2	intron_11	143	146	152	113	0	0
13105.m10313	LOC_Os05g24601.3	intron_3	1566	136.5	148.75	131	0	0
13104.m29428	LOC_Os04g38525.1	intron_2	217	62	75	59	0	0
13104.m05433	LOC_Os04g52880.1	intron_1	480	724	651	623	0	0
13106.m10503	LOC_Os06g04399.2	intron_3	1939	354.5	397.5	263.667	0	0
13109.m03956	LOC_Os09g39462.1	intron_5	268	163	200	182	0	0
13110.m03243	LOC_Os10g35950.1	intron_1	980	230	196	228	0	0
13106.m00318	LOC_Os06g03760.3	intron_3	692	123	128.333	128	0	0
13106.m04201	LOC_Os06g40415.1	intron_3	1476	266.5	335	192	0	0
13102.m00637	LOC_Os02g05790.1	intron_1	460	270	293	295	0	0
13102.m00637	LOC_Os02g05790.1	intron_2	391	390	406	315	0	0
13102.m00637	LOC_Os02g05790.1	intron_4	473	123	122	130	0	0
13102.m00637	LOC_Os02g05790.1	intron_6	780	171.333	168.167	125.5	0	0
13105.m00678	LOC_Os05g06340.1	intron_3	319	346	383	299	0	0
13105.m00678	LOC_Os05g06340.1	intron_4	254	178	201	170	0	0
13104.m11824	LOC_Os04g24165.1	intron_1	1489	295	331	291	0	0
13103.m05669	LOC_Os03g52040.1	intron_11	92	39	62	45	0	3.99317359937123e-312
13106.m00394	LOC_Os06g04399.1	intron_4	1763	312.5	336	215.667	0	0
13112.m03765	LOC_Os12g36740.1	intron_3	389	144.5	118.5	111	0	0
13107.m04637	LOC_Os07g44090.1	intron_1	552	70	91.3333	66.6667	0	0
13104.m04788	LOC_Os04g47290.2	intron_14	1228	106.5	129.5	79	0	0
13101.m06622	LOC_Os01g61970.2	intron_1	421	351	385	268	0	0
13103.m01191	LOC_Os03g10620.1	intron_2	2448	246	260.5	215	0	0
13112.m03764	LOC_Os12g36740.2	intron_3	287	94.5	69.5	68	0	0
13108.m00403	LOC_Os08g04270.3	intron_1	1481	468.833	461.917	437.25	0	0
13107.m03224	LOC_Os07g31870.1	intron_2	3051	138.5	145	102.917	0	0
13101.m08029	LOC_Os01g73580.1	intron_1	758	95	88	58	0	0
13110.m03504	LOC_Os10g38489.1	intron_1	6045	3242	3281	2960	0	0
13101.m00576	LOC_Os01g05900.1	intron_1	17811	2030.75	2103.58	1975.17	0	0
13104.m11872	LOC_Os04g17479.2	intron_1	502	85.5	73	66	0	0
13108.m03180	LOC_Os08g30730.1	intron_3	1165	346	446	294	0	0
13108.m09396	LOC_Os08g40919.2	intron_1	1461	236.083	284.667	172.583	0	0
13112.m00310	LOC_Os12g03500.1	intron_3	203	100	102	82	0	0
13103.m05332	LOC_Os03g49250.1	intron_1	811	82	94	70	0	0
13102.m04508	LOC_Os02g40454.1	intron_5	291	71	82.5	60	0	0
13111.m09192	LOC_Os11g04104.3	intron_1	4921	122.667	143.333	109.667	0	3.08077344501321e-314
13112.m00194	LOC_Os12g02589.1	intron_1	3725	333.417	326.5	301.75	0	0
13106.m01323	LOC_Os06g12170.3	intron_2	1940	160.917	206.417	159.833	0	0
13108.m03063	LOC_Os08g29650.1	intron_6	1862	156	146	97	0	0
13102.m06734	LOC_Os02g58150.1	intron_1	2765	769.5	777.5	764	0	0
13110.m00142	LOC_Os10g02380.1	intron_1	3332	612.5	572	581	0	0
13112.m00570	LOC_Os12g05655.1	intron_1	460	103.5	120	72	0	0
13110.m02248	LOC_Os10g26400.2	intron_4	366	192	267	155	0	0
13101.m04558	LOC_Os01g44020.1	intron_1	543	133.75	134.5	109.75	0	0
13101.m05561	LOC_Os01g53090.1	intron_2	8135	421.5	468	361.25	0	0
13102.m02539	LOC_Os02g22590.1	intron_6	867	144.667	143.5	94.8333	0	0
13108.m02963	LOC_Os08g28690.1	intron_5	1415	213	268	190	0	0
13108.m00125	LOC_Os08g01930.1	intron_6	2424	280	319	157	0	0
13103.m02548	LOC_Os03g21270.3	intron_3	2940	490.5	491.5	439.5	0	0
13111.m01043	LOC_Os11g09864.2	intron_1	1251	146	149.5	79.5	0	0
13101.m05819	LOC_Os01g55290.2	intron_5	448	211	215	114	0	0
13102.m05298	LOC_Os02g47110.2	intron_6	106	68	70	65	0	0
13112.m08908	LOC_Os12g19350.2	intron_2	10856	455.667	507.833	420.75	0	0
13108.m01981	LOC_Os08g19114.1	intron_2	1370	115	128	89	0	0
13104.m03124	LOC_Os04g32590.1	intron_2	1191	99	93	58	0	2.67177258732854e-315
13110.m02869	LOC_Os10g32770.1	intron_2	1505	211.5	196.5	133.5	0	0
13102.m04779	LOC_Os02g43090.1	intron_1	721	118.5	113.5	61	0	0
13102.m04779	LOC_Os02g43090.1	intron_2	3251	122	128.5	91.0833	0	0
13108.m03312	LOC_Os08g31910.1	intron_2	1676	321.5	282.083	296.083	0	0
13108.m03312	LOC_Os08g31910.1	intron_5	1105	154.833	190	152	0	0
13101.m07179	LOC_Os01g66300.1	intron_1	586	70	78	69	0	0
13101.m03058	LOC_Os01g29409.1	intron_4	7134	273.333	286.333	181.333	0	0
13105.m00155	LOC_Os05g02020.2	intron_1	1233	221	252	211.5	0	0
13112.m08887	LOC_Os12g04204.3	intron_1	724	351.5	331.417	348.167	0	0
13102.m05362	LOC_Os02g47580.1	intron_2	1037	328	345	271	0	0
13102.m04783	LOC_Os02g43090.3	intron_1	4098	282.5	288	186.083	0	0
13108.m03511	LOC_Os08g33650.2	intron_1	2845	399	389	157	0	0
13106.m01328	LOC_Os06g12170.8	intron_1	1755	104.917	124.417	102.833	0	0
13105.m03740	LOC_Os05g35710.2	intron_3	88	55	51	54	0	0
13107.m01019	LOC_Os07g10070.1	intron_2	204	74	71	59	0	0
13107.m01019	LOC_Os07g10070.1	intron_3	190	73	90	63	0	0
13110.m03025	LOC_Os10g34030.1	intron_10	289	159	145	119	0	0
13110.m03025	LOC_Os10g34030.1	intron_7	300	170	186	154	0	0
13110.m00487	LOC_Os10g05680.1	intron_1	707	87	114.5	78	0	0
13104.m04802	LOC_Os04g47410.5	intron_11	186	86	135	78	0	0
13102.m06356	LOC_Os02g55440.2	intron_1	951	112	106	42	0	0
13106.m05376	LOC_Os06g50050.2	intron_5	107	63	86	78	0	0
13111.m00021	LOC_Os11g01154.1	intron_1	1607	232.667	254.833	232.083	0	0
13111.m01053	LOC_Os11g09960.1	intron_2	2051	336.5	333.083	272.583	0	0
13111.m09237	LOC_Os11g34230.5	intron_3	1444	104.25	111.917	81.6667	0	0
13101.m03199	LOC_Os01g31810.1	intron_2	1827	644.083	672.083	611.583	0	0
13110.m00488	LOC_Os10g05680.2	intron_1	413	292	312.5	311.5	0	0
13111.m03481	LOC_Os11g35710.1	intron_6	1343	120	126	94	0	0
13112.m03630	LOC_Os12g35465.1	intron_4	321	75.5	92.5	69	0	0
13112.m03630	LOC_Os12g35465.1	intron_5	212	75.5	87	64.5	0	0
13112.m02783	LOC_Os12g27370.1	intron_1	901	360	370	302	0	0
13111.m03304	LOC_Os11g34150.1	intron_2	1524	360	359	222	0	0
13109.m00316	LOC_Os09g03939.2	intron_2	2943	210.583	192.417	206.5	0	0
13112.m01607	LOC_Os12g15222.3	intron_1	6479	221.083	241	176.333	0	0
13112.m01606	LOC_Os12g15222.1	intron_1	6479	221.083	241	176.333	0	0
13109.m00582	LOC_Os09g07360.2	intron_4	3658	378	415.5	302	0	0
13107.m04225	LOC_Os07g40640.1	intron_1	610	82	67.5	77.1667	0	0
13107.m04225	LOC_Os07g40640.1	intron_2	231	110	100	98	0	0
13104.m04354	LOC_Os04g43770.1	intron_1	408	128.5	156	127.5	0	0
13104.m04354	LOC_Os04g43770.1	intron_3	462	98	116	80	0	0
13104.m04354	LOC_Os04g43770.1	intron_4	1363	488	480.833	298.667	0	0
13102.m00636	LOC_Os02g05780.1	intron_4	259	83	97.5	93	0	0
13111.m01372	LOC_Os11g13500.1	intron_1	308	142	137	132	0	0
13111.m01372	LOC_Os11g13500.1	intron_2	198	65	69	56	0	0
13111.m00398	LOC_Os11g04420.1	intron_1	4020	857.333	882.5	634	0	0
13112.m08942	LOC_Os12g41430.3	intron_3	620	83.5	128	70	0	0
13102.m04144	LOC_Os02g37834.4	intron_1	1723	338.583	368.167	249.833	0	0
13104.m02495	LOC_Os04g26380.1	intron_3	366	187	174	147	0	0
13109.m00577	LOC_Os09g07320.1	intron_4	3816	304.167	294.75	198.417	0	0
13109.m00577	LOC_Os09g07320.1	intron_9	3012	145.25	170.5	109	0	0
13101.m05468	LOC_Os01g52250.2	intron_16	243	624.5	555.5	604.5	0	0
13101.m15099	LOC_Os01g64170.5	intron_1	2317	752.25	661.5	734.75	0	0
13109.m00425	LOC_Os09g04880.2	intron_2	1977	185	189	127	0	0
13102.m29136	LOC_Os02g01365.1	intron_7	1969	312.5	344	280.5	0	0
13101.m06407	LOC_Os01g60230.1	intron_12	769	198	234	184	0	0
13110.m01270	LOC_Os10g14814.1	intron_2	2227	186.833	217.083	170.167	0	0
13111.m09209	LOC_Os11g09979.2	intron_1	97	47	70	43	0	0
13111.m00061	LOC_Os11g01490.1	intron_5	1732	337	323	232	0	0
13108.m04878	LOC_Os08g44820.3	intron_3	552	74.75	64	69	0	4.81277444486245e-314
13103.m12935	LOC_Os03g08284.3	intron_1	466	81	100	88	0	0
13109.m02162	LOC_Os09g22500.1	intron_1	1541	85	109	105	0	0
13109.m02162	LOC_Os09g22500.1	intron_2	848	309	316	255	0	0
13109.m02162	LOC_Os09g22500.1	intron_4	995	153	149	61	0	0
13110.m03378	LOC_Os10g37240.2	intron_2	182	55	71	65	0	0
13110.m02536	LOC_Os10g29620.1	intron_4	847	90	95	69	0	0
13103.m04081	LOC_Os03g37580.4	intron_2	1170	100.667	132.333	103.75	0	0
13106.m04105	LOC_Os06g39600.1	intron_1	2279	178	169	153	0	0
13110.m03613	LOC_Os10g39440.2	intron_4	1231	214.5	251	188.5	0	0
13107.m02178	LOC_Os07g22390.1	intron_2	622	84.3333	86.6667	50.5	0	0
13104.m04610	LOC_Os04g45930.3	intron_12	2558	318	317	202.5	0	0
13106.m01005	LOC_Os06g09370.3	intron_2	231	73	85	74	0	0
13107.m04963	LOC_Os07g46852.3	intron_2	525	76	70	67.5	0	0
13111.m02640	LOC_Os11g27540.2	intron_2	426	173	207	125	0	0
13101.m15031	LOC_Os01g31810.2	intron_3	2978	796.333	817.75	754.75	0	0
13103.m05959	LOC_Os03g54880.1	intron_2	161	73	85	69	0	0
13103.m04205	LOC_Os03g38740.1	intron_10	623	87	97	71	0	0
13104.m04455	LOC_Os04g44590.5	intron_2	2886	194.75	200.75	166.75	0	0
13107.m04050	LOC_Os07g39114.1	intron_1	651	293	322.5	269.5	0	0
13102.m05107	LOC_Os02g45520.2	intron_6	120	59	54	47	0	0
13112.m08883	LOC_Os12g02530.3	intron_3	915	343	369	399	0	0
13103.m06970	LOC_Os03g62910.2	intron_13	1802	143	175	132.5	0	0
13103.m12882	LOC_Os03g34310.6	intron_2	546	91	94	49	0	0
13110.m02580	LOC_Os10g30080.1	intron_3	1274	96.5	95	76.5	0	0
13104.m04210	LOC_Os04g42600.2	intron_7	390	2193.5	2455.58	2091.25	0	0
13102.m03889	LOC_Os02g35750.3	intron_2	768	84	84	82	0	0
13103.m06143	LOC_Os03g56320.3	intron_6	312	110	122	83	0	0
13110.m02581	LOC_Os10g30080.2	intron_3	1274	96.5	95	76.5	0	0
13111.m02055	LOC_Os11g20310.1	intron_1	606	145	141	169	0	0
13111.m02055	LOC_Os11g20310.1	intron_2	850	107	106	46	0	0
13111.m02055	LOC_Os11g20310.1	intron_3	542	74	103	71	0	0
13103.m03883	LOC_Os03g34310.2	intron_3	546	91	94	49	0	0
13105.m03026	LOC_Os05g29750.1	intron_1	1313	244	264	260	0	0
13103.m06001	LOC_Os03g55164.1	intron_7	1425	321	300	253	0	0
13112.m00841	LOC_Os12g07980.1	intron_4	225	128	140	113	0	0
13104.m01997	LOC_Os04g21600.1	intron_2	2791	201	249	125.5	0	0
13111.m00594	LOC_Os11g06020.1	intron_1	793	91.8333	95.8333	74.3333	0	0
13104.m02699	LOC_Os04g28480.2	intron_4	1970	195	197.5	153.5	0	0
13101.m05951	LOC_Os01g56270.1	intron_2	2285	255	290	196.167	0	0
13103.m01103	LOC_Os03g09930.2	intron_1	3028	152	166	149	0	0
13110.m01867	LOC_Os10g22310.3	intron_1	4541	261.5	265.333	221.667	0	0
13104.m02698	LOC_Os04g28480.1	intron_4	2110	209	209	161	0	0
13103.m12888	LOC_Os03g48190.2	intron_2	2082	113.5	117.417	86.5	0	0
13102.m05950	LOC_Os02g52210.1	intron_1	677	158	206.167	132.5	0	0
13112.m03197	LOC_Os12g31410.1	intron_1	1342	208	215	195	0	0
13107.m24469	LOC_Os07g37770.1	intron_5	861	2499.75	2616.5	2394	0	0
13110.m01810	LOC_Os10g21810.1	intron_13	255	132	143	109	0	0
13112.m03576	LOC_Os12g34990.4	intron_3	2028	195.167	205.333	131	0	0
13104.m05783	LOC_Os04g55730.1	intron_12	306	61	81	43	0	1.3113831277214e-317
13101.m05939	LOC_Os01g56200.2	intron_1	1492	270	337.5	236	0	0
13112.m03990	LOC_Os12g38670.1	intron_1	1362	1200	1297	1022	0	0
13101.m02078	LOC_Os01g19140.1	intron_6	719	139	131.75	88.75	0	0
13112.m01608	LOC_Os12g15222.2	intron_1	6479	221.083	241	176.333	0	0
13101.m00134	LOC_Os01g02020.3	intron_8	433	67	77.6667	77.3333	0	0
13105.m03950	LOC_Os05g37884.1	intron_1	518	103	109	93	0	0
13104.m03540	LOC_Os04g36620.2	intron_13	85	73	88	49	0	0
13105.m00765	LOC_Os05g07070.2	intron_1	4333	124.333	147.667	107	0	0
13103.m02132	LOC_Os03g17850.1	intron_3	709	504	473	419	0	0
13104.m03236	LOC_Os04g33470.2	intron_4	240	136	159	117	0	0
13112.m00571	LOC_Os12g05660.1	intron_4	572	107	131	100.5	0	0
13103.m06103	LOC_Os03g55990.2	intron_1	708	81	109.5	76.5	0	0
13105.m01534	LOC_Os05g14580.1	intron_2	268	86	121	71	0	0
13112.m01387	LOC_Os12g13120.2	intron_7	743	205.333	229	202	0	0
13103.m00054	LOC_Os03g01360.2	intron_4	1685	123.833	138.667	112.333	0	0
13104.m11946	LOC_Os04g51809.3	intron_1	474	97.4167	104.5	91.8333	0	0
13103.m03413	LOC_Os03g29760.3	intron_1	1485	166	174.5	127.5	0	0
13101.m04736	LOC_Os01g46120.3	intron_3	708	151	177.333	125	0	0
13107.m02774	LOC_Os07g27760.2	intron_8	2871	394.5	463.5	343.5	0	0
13103.m03411	LOC_Os03g29760.1	intron_1	1480	166	174.5	127.5	0	0
13112.m02050	LOC_Os12g19304.1	intron_1	2522	154	150	144	0	0
13109.m01495	LOC_Os09g15760.1	intron_2	770	102	128	120	0	0
13109.m01495	LOC_Os09g15760.1	intron_4	283	131	146	78	0	0
13107.m02244	LOC_Os07g22910.1	intron_1	848	341.5	369.5	300	0	0
13112.m02052	LOC_Os12g19304.2	intron_1	2522	154	150	144	0	0
13108.m02136	LOC_Os08g20500.1	intron_1	1351	601	647.5	565	0	0
13102.m03321	LOC_Os02g30410.2	intron_5	198	101	113	72	0	0
13105.m01337	LOC_Os05g12300.1	intron_2	804	91.6667	109.5	88.1667	0	0
13101.m06207	LOC_Os01g58459.1	intron_2	666	171	177	106	0	0
13106.m04142	LOC_Os06g39900.3	intron_3	1210	132	163.5	110.5	0	0
13105.m00768	LOC_Os05g07070.1	intron_1	4333	124.333	147.667	107	0	0
13101.m06256	LOC_Os01g58890.3	intron_1	901	155.667	157	158.667	0	0
13111.m00220	LOC_Os11g02840.1	intron_1	627	360.583	390.583	320.583	0	0
13107.m10043	LOC_Os07g46852.4	intron_1	525	76	70	67.5	0	0
13107.m02642	LOC_Os07g26640.1	intron_1	179	1983	1925	1894.5	0	0
13101.m42772	LOC_Os01g69980.1	intron_1	582	303	308	279	0	0
13103.m01651	LOC_Os03g14120.1	intron_9	221	84	87	58	0	0
13106.m04143	LOC_Os06g39900.2	intron_3	1210	132	163.5	110.5	0	0
13101.m05952	LOC_Os01g56270.2	intron_2	2285	255	290	196.167	0	0
13102.m02992	LOC_Os02g27490.1	intron_5	548	116	127	110	0	0
13106.m04992	LOC_Os06g47130.2	intron_11	701	159	178	139	0	0
13101.m02382	LOC_Os01g22450.1	intron_2	893	93	98	60	0	0
13108.m01372	LOC_Os08g12840.1	intron_4	846	242	249	250	0	0
13102.m05243	LOC_Os02g46700.1	intron_4	2517	116.25	113	89	0	0
13103.m00165	LOC_Os03g02150.2	intron_23	1220	355.167	396	332.833	0	0
13102.m01034	LOC_Os02g09440.1	intron_9	690	260	258	149	0	0
13102.m12459	LOC_Os02g53700.7	intron_19	1517	197.167	236.167	150.917	0	0
13104.m02333	LOC_Os04g24900.1	intron_1	164	121	103	132	0	0
13103.m00164	LOC_Os03g02150.1	intron_25	1220	355.167	396	332.833	0	0
13105.m04182	LOC_Os05g39650.1	intron_3	1677	137	152	91	0	0
13104.m04735	LOC_Os04g46890.1	intron_9	141	73	77	79	0	0
13104.m03466	LOC_Os04g35530.1	intron_2	1528	453	541	316	0	0
13108.m03455	LOC_Os08g33190.1	intron_2	1700	418	403.083	382.583	0	0
13107.m03031	LOC_Os07g30120.1	intron_5	1232	143	123	80	0	0
13110.m03313	LOC_Os10g36580.1	intron_1	263	150	173	168	0	0
13101.m06725	LOC_Os01g62750.1	intron_10	537	284.5	300	247.5	0	0
13101.m06725	LOC_Os01g62750.1	intron_12	162	82	90	66	0	0
13101.m06725	LOC_Os01g62750.1	intron_3	7015	912.5	1099	903	0	0
13112.m01570	LOC_Os12g14840.2	intron_2	1556	327.5	377.5	207	0	0
13108.m04578	LOC_Os08g42480.1	intron_1	1743	259.75	228.5	247	0	0
13109.m03585	LOC_Os09g36370.1	intron_6	1045	118	140.5	137.5	0	0
13110.m01215	LOC_Os10g13800.1	intron_2	1238	137	162	136	0	0
13105.m05203	LOC_Os05g48790.1	intron_1	1875	89.5	113.333	89.8333	0	0
13104.m04209	LOC_Os04g42600.1	intron_7	390	2193.5	2455.58	2091.25	0	0
13103.m02690	LOC_Os03g22380.1	intron_11	1063	85	92	74	0	0
13111.m00707	LOC_Os11g06934.1	intron_6	1038	95.3333	96	104	0	0
13111.m00707	LOC_Os11g06934.1	intron_11	1072	87.6667	92.1667	62.5	0	2.58702896451937e-313
13106.m00307	LOC_Os06g03682.2	intron_1	1347	122	119	112	0	0
13107.m00970	LOC_Os07g09620.1	intron_1	274	110	110	86	0	0
13104.m04456	LOC_Os04g44590.4	intron_2	2886	194.75	200.75	166.75	0	0
13106.m10545	LOC_Os06g29260.3	intron_1	16390	405.667	439	277	0	0
13103.m05687	LOC_Os03g52230.1	intron_2	1037	229.5	222.5	168	0	0
13107.m03537	LOC_Os07g34640.1	intron_3	1157	148	189	122	0	0
13103.m00220	LOC_Os03g02570.1	intron_5	442	134.25	141.75	122.75	0	0
13109.m00578	LOC_Os09g07320.2	intron_9	3012	145.25	170.5	109	0	0
13109.m03695	LOC_Os09g37280.2	intron_11	119	88	84	66	0	0
13107.m02772	LOC_Os07g27760.1	intron_9	923	70	97	70.5	0	2.74898125346070e-320
13102.m02274	LOC_Os02g20330.1	intron_10	2151	132	155.5	129	0	0
13103.m02036	LOC_Os03g17020.2	intron_3	555	188	220	151	0	0
13112.m08892	LOC_Os12g05780.3	intron_6	990	174	206	173	0	0
13102.m05851	LOC_Os02g51450.1	intron_1	239	79	95	61	0	0
13107.m00869	LOC_Os07g08760.2	intron_5	307	165	159	144	0	0
13109.m01279	LOC_Os09g13870.3	intron_8	251	78	72	59	0	0
13105.m01205	LOC_Os05g11140.3	intron_16	751	108.5	112.5	90	0	0
13107.m24463	LOC_Os07g12570.1	intron_1	1019	84.5	97.25	105.5	0	0
13107.m04611	LOC_Os07g43870.2	intron_1	1215	273.833	249.417	266.25	0	0
13105.m03142	LOC_Os05g30730.1	intron_2	454	63	83	60	0	0
13103.m02329	LOC_Os03g19462.1	intron_2	160	52	80	49	0	0
13101.m07802	LOC_Os01g71620.1	intron_3	288	83	107	89	0	0
13101.m07802	LOC_Os01g71620.1	intron_6	323	82	82	59	0	0
13101.m07802	LOC_Os01g71620.1	intron_8	872	93	87	59	0	0
13106.m00916	LOC_Os06g08720.2	intron_10	534	119	112	74	0	0
13111.m04378	LOC_Os11g43895.1	intron_2	895	305	344.5	208.5	0	0
13102.m02345	LOC_Os02g20934.2	intron_3	2912	153.5	132.833	103	0	0
13102.m04896	LOC_Os02g44010.1	intron_4	231	64	78	54	0	0
13108.m01982	LOC_Os08g19114.2	intron_1	1002	886.25	1038.75	679.75	0	0
13101.m04578	LOC_Os01g44220.1	intron_1	811	105	116	89	0	0
13108.m23057	LOC_Os08g24946.1	intron_9	1643	161	193	115	0	0
13103.m03553	LOC_Os03g31134.1	intron_4	784	2512	2637	2283	0	0
13106.m04177	LOC_Os06g40200.1	intron_4	1656	110	134	80	0	0
13101.m05465	LOC_Os01g52250.3	intron_16	615	2760.5	2598.5	2506	0	0
13108.m00542	LOC_Os08g05530.1	intron_4	482	181	251	186	0	0
13102.m06054	LOC_Os02g53080.2	intron_1	1681	122	146.5	98.5	0	0
13104.m11850	LOC_Os04g51809.2	intron_1	3092	385.333	398.833	319.667	0	0
13112.m00964	LOC_Os12g09089.1	intron_5	7390	189.5	227.833	107.5	0	0
13104.m05101	LOC_Os04g49890.1	intron_2	470	67	80	56	0	1.04429667430173e-318
13104.m02547	LOC_Os04g26920.1	intron_2	2215	288.667	369.167	241.5	0	0
13111.m00289	LOC_Os11g03484.1	intron_1	8435	1293.08	1399.5	1119.42	0	0
13110.m00807	LOC_Os10g09200.1	intron_1	616	264	272	256	0	0
13110.m00807	LOC_Os10g09200.1	intron_4	701	609.667	616.75	504.75	0	0
13102.m03705	LOC_Os02g34190.1	intron_3	291	69	63.75	57.5	0	0
13103.m04459	LOC_Os03g41419.1	intron_4	2211	85	109	115	0	0
13112.m00092	LOC_Os12g01744.1	intron_3	707	110.833	127.833	80.8333	0	0
13108.m03746	LOC_Os08g35720.1	intron_1	585	84	99.5	100.5	0	0
13109.m02721	LOC_Os09g27744.1	intron_1	365	143	181	142	0	0
13105.m01206	LOC_Os05g11140.1	intron_15	874	143	151.5	122	0	0
13105.m10408	LOC_Os05g46954.2	intron_1	733	139.667	135	94	0	0
13102.m05502	LOC_Os02g48620.2	intron_29	111	63	62	37	0	0
13110.m03554	LOC_Os10g38980.3	intron_7	278	84	79	55	0	0
13105.m04468	LOC_Os05g42000.2	intron_2	754	247.5	229	218.5	0	0
13110.m03380	LOC_Os10g37240.4	intron_2	846	156	154	103	0	0
13103.m03637	LOC_Os03g31839.1	intron_6	540	460	478	378	0	0
13107.m05039	LOC_Os07g47360.1	intron_11	233	73	79	67	0	0
13101.m05148	LOC_Os01g49529.1	intron_1	10389	227.833	243	234.75	0	0
13109.m01025	LOC_Os09g11450.1	intron_18	675	166	210	171	0	0
13103.m05055	LOC_Os03g46950.1	intron_6	893	155	175	131	0	0
13105.m00015	LOC_Os05g01040.4	intron_1	2885	362.75	357.75	328.25	0	0
13101.m06755	LOC_Os01g62970.2	intron_1	1695	101	100.5	79	0	0
13103.m06873	LOC_Os03g62250.1	intron_10	351	129	145	119	0	0
13102.m00081	LOC_Os02g01590.2	intron_2	1404	118.5	117	119	0	0
13105.m02750	LOC_Os05g26760.1	intron_3	855	119.5	126.5	92	0	0
13101.m06004	LOC_Os01g56670.2	intron_17	268	536	536.5	515.5	0	0
13107.m00498	LOC_Os07g05440.2	intron_1	482	68.5	63	71	0	7.64569551333204e-316
13105.m05586	LOC_Os05g51690.3	intron_1	2520	168.833	166.667	139.333	0	0
13103.m04300	LOC_Os03g39640.1	intron_14	244	93	127	89	0	0
13103.m01606	LOC_Os03g13820.2	intron_6	1376	377	384	391.5	0	0
13103.m05352	LOC_Os03g49430.1	intron_1	1221	127	124.5	107.5	0	0
13105.m04686	LOC_Os05g44330.4	intron_3	1806	178	155	148	0	0
13109.m00360	LOC_Os09g04300.4	intron_1	711	193	222	177	0	0
13106.m00946	LOC_Os06g08910.2	intron_5	327	134	124	96	0	0
13112.m02210	LOC_Os12g21789.3	intron_2	679	176	195	176	0	0
13108.m02658	LOC_Os08g25864.1	intron_3	706	107.167	124.667	82.3333	0	0
13102.m02126	LOC_Os02g18990.1	intron_1	2249	143.5	116	74.3333	0	0
13106.m00737	LOC_Os06g07090.2	intron_19	222	133	128	99	0	0
13108.m03950	LOC_Os08g37480.1	intron_3	2743	129.917	120	94.6667	0	0
13107.m09998	LOC_Os07g22390.2	intron_2	622	84.3333	86.6667	50.5	0	0
13108.m02371	LOC_Os08g23160.1	intron_4	1628	243.333	276.833	206	0	0
13106.m05427	LOC_Os06g50490.4	intron_1	404	347.333	366.667	314.5	0	0
13105.m10417	LOC_Os05g49990.3	intron_2	937	95.1667	103.5	59.5	0	0
13103.m02631	LOC_Os03g21914.1	intron_7	2965	107.833	105.583	105.083	0	1.62313625683501e-311
13112.m03931	LOC_Os12g38180.1	intron_1	1375	110	102	70	0	0
13112.m00227	LOC_Os12g02810.1	intron_1	1160	98.9167	110.917	78.0833	0	0
13105.m05359	LOC_Os05g49990.1	intron_1	1080	102.167	108.5	61	0	0
13109.m01797	LOC_Os09g19150.2	intron_2	1297	206	224.75	137.5	0	0
13101.m01627	LOC_Os01g14770.1	intron_1	1559	137	131	97	0	0
13106.m02360	LOC_Os06g22010.1	intron_1	947	127	169	108	0	0
13106.m02360	LOC_Os06g22010.1	intron_2	157	285.5	377.5	230.5	0	0
13106.m02360	LOC_Os06g22010.1	intron_3	1545	2106.67	1935.67	1207.67	0	0
13111.m00708	LOC_Os11g06934.2	intron_8	1072	87.6667	92.1667	62.5	0	3.77300803707217e-313
13106.m00107	LOC_Os06g01960.1	intron_1	1384	365.5	356.75	362.25	0	0
13112.m01711	LOC_Os12g16260.1	intron_1	652	751.333	801.5	516.333	0	0
13106.m01528	LOC_Os06g13830.1	intron_1	601	85	93	101.5	0	0
13112.m02729	LOC_Os12g26850.1	intron_7	555	294	324.5	237	0	0
13105.m02986	LOC_Os05g28960.2	intron_8	330	111	110	113	0	0
13112.m04342	LOC_Os12g41600.2	intron_1	149	76	71	36	0	0
13106.m03027	LOC_Os06g29310.2	intron_6	2231	238.333	253.833	254.667	0	0
13104.m02952	LOC_Os04g31020.1	intron_4	764	110.5	150.167	109	0	0
13104.m02952	LOC_Os04g31020.1	intron_6	461	74	77	59	0	0
13102.m00275	LOC_Os02g03050.2	intron_8	342	61.3333	65.6667	67.8333	0	0
13103.m04787	LOC_Os03g44484.1	intron_2	4112	251	274	244	0	0
13112.m03820	LOC_Os12g37210.1	intron_1	494	202.5	223.167	177.667	0	0
13105.m03208	LOC_Os05g31230.2	intron_1	5135	615	543	518.5	0	0
13102.m06390	LOC_Os02g55720.1	intron_5	3065	292.917	265.333	195.833	0	0
13102.m06390	LOC_Os02g55720.1	intron_7	469	152	154	135	0	0
13106.m03026	LOC_Os06g29310.1	intron_5	2231	238.333	253.833	254.667	0	0
13102.m02231	LOC_Os02g19950.1	intron_2	1075	233.5	241.75	184.5	0	0
13102.m02231	LOC_Os02g19950.1	intron_4	469	244.667	266.667	186	0	0
13102.m02231	LOC_Os02g19950.1	intron_5	998	178	240	192	0	0
13105.m00207	LOC_Os05g02420.2	intron_1	778	140	139	89	0	0
13103.m01772	LOC_Os03g15110.3	intron_3	361	94.3333	81	20.3333	0	0
13103.m01670	LOC_Os03g14260.2	intron_11	1716	100	116	76	0	0
13109.m07577	LOC_Os09g29404.3	intron_13	4804	422.75	461.25	415	0	0
13109.m02912	LOC_Os09g29404.2	intron_11	4804	422.75	461.25	415	0	0
13105.m04966	LOC_Os05g46490.1	intron_10	292	61	87	74	0	0
13105.m05409	LOC_Os05g50420.1	intron_4	13064	304.083	303.417	217.833	0	0
13104.m03416	LOC_Os04g35150.1	intron_2	490	99	137	90	0	0
13110.m00952	LOC_Os10g10580.1	intron_1	1641	843.5	854.5	716.5	0	0
13106.m04736	LOC_Os06g45040.1	intron_1	832	219	239	140	0	0
13104.m04784	LOC_Os04g47260.1	intron_2	442	124	120	133	0	0
13110.m03676	LOC_Os10g39880.1	intron_2	403	179.5	198	172	0	0
13102.m12377	LOC_Os02g12654.2	intron_1	1356	109	113	88.5	0	0
13110.m03644	LOC_Os10g39670.1	intron_2	693	249	262.667	208	0	0
13102.m02352	LOC_Os02g20980.2	intron_4	1387	126.167	159.417	116.583	0	0
13104.m11932	LOC_Os04g45834.3	intron_1	5096	147.75	158.75	105.5	0	0
13103.m04709	LOC_Os03g43800.1	intron_13	1408	143.5	173	131	0	0
13102.m05325	LOC_Os02g47320.1	intron_4	403	276	309	253	0	0
13105.m00014	LOC_Os05g01040.3	intron_8	882	97	108	87.5	0	0
13103.m04710	LOC_Os03g43800.2	intron_13	1408	143.5	173	131	0	0
13112.m02314	LOC_Os12g22760.1	intron_1	125	61	61	57	0	0
13106.m02973	LOC_Os06g28820.1	intron_1	7714	919.333	1021.83	835.083	0	0
13101.m01500	LOC_Os01g13660.1	intron_1	2897	166.5	182	120	0	0
13102.m02678	LOC_Os02g24720.1	intron_1	1552	217	238	154	0	0
13103.m03626	LOC_Os03g31730.1	intron_2	8007	930.667	993.167	837	0	0
13105.m05534	LOC_Os05g51380.2	intron_4	589	104	105	74	0	0
13104.m04597	LOC_Os04g45834.1	intron_1	5096	147.75	158.75	105.5	0	0
13102.m02198	LOC_Os02g19629.2	intron_2	3404	250	257	247	0	0
13109.m03941	LOC_Os09g39350.2	intron_1	1513	230.5	243	206.5	0	0
13110.m03306	LOC_Os10g36500.1	intron_1	935	152	161	116	0	0
13103.m06133	LOC_Os03g56270.2	intron_2	1455	114	124	81	0	0
13112.m03905	LOC_Os12g37920.1	intron_4	817	113	107	99.5	0	0
13102.m05245	LOC_Os02g46710.1	intron_4	815	83	98	69	0	0
13102.m05245	LOC_Os02g46710.1	intron_5	675	132	161	86	0	0
13102.m05245	LOC_Os02g46710.1	intron_6	1411	123	118	83	0	0
13102.m04837	LOC_Os02g43550.1	intron_1	1291	81	112	71	0	0
13101.m01985	LOC_Os01g18280.1	intron_1	1252	134.417	118.5	114.083	0	0
13105.m10338	LOC_Os05g04550.2	intron_2	2329	208.5	228	221.5	0	0
13109.m00253	LOC_Os09g03310.1	intron_3	1065	177.5	203.167	141.167	0	0
13103.m12987	LOC_Os03g31706.2	intron_3	795	167	200	157	0	0
13106.m04942	LOC_Os06g46754.2	intron_3	1801	158	137	135	0	0
13102.m02514	LOC_Os02g22374.1	intron_4	901	98.6667	106.167	60.3333	0	0
13105.m00415	LOC_Os05g04180.1	intron_4	699	126	136	116	0	0
13104.m05193	LOC_Os04g51060.1	intron_1	1767	183	196	123	0	0
13107.m05252	LOC_Os07g48910.3	intron_1	852	97.5	98.5	98	0	0
13101.m00316	LOC_Os01g03660.2	intron_8	1449	122	158	115	0	0
13109.m03290	LOC_Os09g32870.1	intron_3	519	74	96	65	0	0
13111.m01068	LOC_Os11g10090.1	intron_1	4160	264	313	241	0	0
13103.m00291	LOC_Os03g03150.2	intron_10	222	66	55	62	0	0
13105.m01110	LOC_Os05g10330.1	intron_3	334	106.5	89.5	82	0	0
13104.m00937	LOC_Os04g10420.1	intron_4	1876	154	128.583	136.583	0	0
13102.m01216	LOC_Os02g10860.1	intron_5	502	171.833	133.917	90	0	0
13102.m02513	LOC_Os02g22374.3	intron_4	1143	124	129.667	69.6667	0	0
13104.m05631	LOC_Os04g54440.3	intron_1	2373	134.5	134.5	103.5	0	0
13112.m04186	LOC_Os12g40279.1	intron_36	434	87	91	81	0	0
13102.m04552	LOC_Os02g40820.2	intron_1	862	170	169	130	0	0
13102.m03040	LOC_Os02g27870.2	intron_6	3673	134.833	155.167	122.583	0	0
13106.m05437	LOC_Os06g50548.1	intron_1	1060	167	183.833	129	0	0
13106.m05454	LOC_Os06g50715.1	intron_1	1060	167	183.833	129	0	0
13102.m06701	LOC_Os02g57920.1	intron_16	826	112.167	101.75	79.25	0	0
13106.m02477	LOC_Os06g23040.1	intron_3	783	206	152	176	0	0
13112.m08909	LOC_Os12g20390.5	intron_2	440	79.4167	101.167	54.3333	0	0
13102.m06291	LOC_Os02g54930.1	intron_1	836	103.5	89.5	52.75	0	0
13108.m00305	LOC_Os08g03430.2	intron_4	1565	117	131	119	0	0
13102.m06277	LOC_Os02g54820.1	intron_3	436	190	237	170	0	0
13112.m00067	LOC_Os12g01540.1	intron_4	1706	99	127.5	96	0	0
13111.m01635	LOC_Os11g16290.5	intron_1	4259	167	213.917	161.333	0	0
13106.m01722	LOC_Os06g15570.2	intron_1	4221	151	196.5	157.5	0	0
13104.m01947	LOC_Os04g21110.1	intron_4	88	525	604	468	0	0
13106.m04403	LOC_Os06g42100.1	intron_1	633	80	97.5	80.6667	0	0
13106.m02454	LOC_Os06g22829.2	intron_3	1459	145	158	94	0	0
13108.m01505	LOC_Os08g14050.1	intron_1	588	124.333	132	140	0	0
13108.m01505	LOC_Os08g14050.1	intron_2	569	100.667	107.333	105.333	0	0
13101.m03636	LOC_Os01g35930.1	intron_3	729	131	139	110	0	0
13108.m02747	LOC_Os08g26700.3	intron_2	1038	184.5	187.75	120	0	0
13106.m05318	LOC_Os06g49640.2	intron_4	982	203	218	170	0	0
13108.m02746	LOC_Os08g26700.2	intron_2	1035	184.5	187.75	120	0	0
13108.m01808	LOC_Os08g16910.1	intron_3	172	95	92	78	0	0
13111.m01022	LOC_Os11g09690.1	intron_1	212	69.8333	85.6667	61.1667	0	0
13105.m03353	LOC_Os05g32544.1	intron_4	492	211	242	119	0	0
13110.m03239	LOC_Os10g35920.1	intron_1	2447	415	433	362	0	0
13101.m01153	LOC_Os01g10680.1	intron_1	5896	303.5	342.333	242	0	0
13111.m09194	LOC_Os11g04420.4	intron_2	3756	153.667	176.083	139.167	0	0
13105.m05273	LOC_Os05g49290.2	intron_1	780	81	87	67	0	0
13111.m00399	LOC_Os11g04420.3	intron_2	3434	147.667	163.583	135.667	0	0
13110.m03664	LOC_Os10g39790.3	intron_3	292	79	84	48	0	0
13103.m03070	LOC_Os03g26100.1	intron_1	285	577	499	591	0	0
13107.m04453	LOC_Os07g42610.1	intron_1	1462	295	271	228	0	0
13104.m06077	LOC_Os04g57920.1	intron_12	592	149	142	125	0	0
13104.m03749	LOC_Os04g38900.1	intron_1	293	114	114	106	0	0
13110.m02681	LOC_Os10g30970.1	intron_4	643	364.833	449.833	379.333	0	0
13111.m00009	LOC_Os11g01074.4	intron_4	3724	301.417	370.75	284.083	0	0
13103.m04997	LOC_Os03g46440.3	intron_4	2898	119.917	116.25	98.25	0	0
13104.m02161	LOC_Os04g23210.1	intron_25	484	129	110	106	0	0
13112.m00868	LOC_Os12g08240.1	intron_2	956	162.5	169.5	106	0	0
13112.m00868	LOC_Os12g08240.1	intron_3	794	144.667	162.667	112.667	0	0
13102.m01636	LOC_Os02g14730.1	intron_14	520	70	83	58	0	0
13108.m02226	LOC_Os08g21570.1	intron_3	367	76.5	96.5	72.5	0	0
13105.m03451	LOC_Os05g33390.1	intron_13	2465	386	440	504	0	0
13103.m12990	LOC_Os03g36419.2	intron_5	1665	133	161.5	57	0	0
13110.m07859	LOC_Os10g16990.2	intron_3	1248	100	108	46	0	3.04722398057276e-317
13103.m01140	LOC_Os03g10220.1	intron_7	406	84	85	81	0	0
13107.m04190	LOC_Os07g40320.1	intron_1	1558	231	308	174	0	0
13102.m02354	LOC_Os02g21009.1	intron_1	9209	197	208.417	136.167	0	0
13107.m02692	LOC_Os07g27110.1	intron_11	389	93	100	65	0	0
13105.m00577	LOC_Os05g05530.1	intron_4	890	99	113	46	0	0
13102.m02568	LOC_Os02g23823.1	intron_2	5571	161.75	165.333	117	0	0
13106.m02675	LOC_Os06g24910.1	intron_4	1317	112.5	110	64.5	0	0
13108.m01620	LOC_Os08g15149.1	intron_2	229	76	80	75	0	0
13106.m02729	LOC_Os06g25500.1	intron_5	12784	252.667	264.25	229.833	0	0
13108.m09356	LOC_Os08g15444.2	intron_2	508	145.5	184	99.5	0	0
13112.m03629	LOC_Os12g35460.1	intron_7	3548	520	619.5	480.5	0	0
13107.m04874	LOC_Os07g46290.1	intron_4	501	120	136	81	0	0
13112.m03681	LOC_Os12g35910.1	intron_3	368	84	119	83	0	0
13107.m00014	LOC_Os07g01100.1	intron_1	663	103	115	89	0	0
13101.m01332	LOC_Os01g12340.1	intron_11	1126	380	438	344	0	0
13101.m01332	LOC_Os01g12340.1	intron_5	660	261	298	221	0	0
13101.m01332	LOC_Os01g12340.1	intron_6	380	260.5	258	191.5	0	0
13101.m01332	LOC_Os01g12340.1	intron_8	125	165	184	124	0	0
13104.m00989	LOC_Os04g10924.1	intron_1	3145	121.583	138	113	0	0
13111.m02579	LOC_Os11g26920.1	intron_4	790	154.083	168	148.833	0	0
13102.m12362	LOC_Os02g05400.2	intron_11	731	117.5	120.5	87	0	0
13103.m05344	LOC_Os03g49380.2	intron_7	841	86	104	59	0	0
13102.m06790	LOC_Os02g58620.1	intron_1	767	146	155	122	0	0
13107.m02930	LOC_Os07g29224.1	intron_2	207	104.667	108.5	63.5	0	0
13106.m00612	LOC_Os06g06050.1	intron_1	548	73	87	67	0	0
13103.m05231	LOC_Os03g48471.1	intron_1	929	290.5	275.5	140	0	0
13109.m03590	LOC_Os09g36420.1	intron_10	102	302	293	282	0	0
13109.m03590	LOC_Os09g36420.1	intron_9	84	209	254	164	0	0
13105.m05472	LOC_Os05g50910.2	intron_4	2404	104	129.833	87	0	0
13110.m01313	LOC_Os10g15240.1	intron_7	915	257.333	255	233.5	0	0
13106.m05455	LOC_Os06g50724.1	intron_1	1657	112.833	128.083	103	0	0
13107.m02899	LOC_Os07g28910.1	intron_4	2117	197.667	230.833	188.667	0	0
13102.m06736	LOC_Os02g58170.1	intron_1	957	92	106	84	0	0
13110.m07655	LOC_Os10g07546.1	intron_1	1478	180.5	200	190.5	0	0
13102.m00588	LOC_Os02g05400.1	intron_10	731	117.5	120.5	87	0	0
13110.m03997	LOC_Os10g42520.1	intron_2	442	80	116	84	0	0
13111.m00821	LOC_Os11g07860.1	intron_2	714	148	166.833	153.333	0	0
13111.m00821	LOC_Os11g07860.1	intron_4	1124	210	205	149	0	0
13106.m10550	LOC_Os06g31060.2	intron_1	1318	585	617	530	0	0
13101.m00057	LOC_Os01g01390.5	intron_2	2027	218	267	214	0	0
13101.m03313	LOC_Os01g32840.1	intron_1	1023	95.5	109	66	0	0
13104.m01399	LOC_Os04g15550.1	intron_8	2866	209.667	217.25	144.583	0	0
13107.m04081	LOC_Os07g39400.1	intron_1	784	88.6667	75.3333	79.1667	0	0
13107.m04081	LOC_Os07g39400.1	intron_4	540	437	461	403	0	0
13110.m02014	LOC_Os10g24094.2	intron_4	1638	88.6667	108.333	90.9167	0	0
13103.m12862	LOC_Os03g07310.2	intron_8	2751	244	299	207	0	0
13109.m01249	LOC_Os09g13600.1	intron_2	838	110.5	140	55.75	0	0
13111.m04635	LOC_Os11g46300.2	intron_1	1063	83.8333	109.75	75.8333	0	0
13105.m02465	LOC_Os05g24160.1	intron_5	1510	93.6667	106.5	84	0	0
13105.m01107	LOC_Os05g10310.3	intron_1	6241	204	215.5	196	0	0
13111.m02455	LOC_Os11g25720.1	intron_1	11219	362.167	401.833	318.333	0	0
13106.m05430	LOC_Os06g50510.1	intron_3	1057	92	99.5	105	0	0
13106.m05430	LOC_Os06g50510.1	intron_4	1722	114.833	131.417	106.667	0	0
13106.m05430	LOC_Os06g50510.1	intron_9	344	112.5	141	105	0	0
13103.m02112	LOC_Os03g17670.1	intron_1	520	84	92	98	0	0
13112.m00772	LOC_Os12g07390.1	intron_3	1936	157.5	183	145	0	0
13106.m04959	LOC_Os06g46890.1	intron_1	1587	92	104	88	0	0
13107.m01184	LOC_Os07g11490.2	intron_5	85	71.5	66	51	0	0
13106.m04118	LOC_Os06g39700.1	intron_1	559	247.75	229.25	153.333	0	0
13106.m04118	LOC_Os06g39700.1	intron_2	153	58	66.3333	47.6667	0	0
13103.m04096	LOC_Os03g37730.1	intron_1	1062	76.8333	96.0833	72.3333	0	6.79112992834627e-319
13107.m00124	LOC_Os07g02030.1	intron_4	958	153	193	183	0	0
13106.m02403	LOC_Os06g22380.1	intron_3	6382	233.333	305	273	0	0
13111.m02481	LOC_Os11g25980.2	intron_26	679	76	81	63	0	2.37585793706493e-318
13108.m01664	LOC_Os08g15590.1	intron_8	1166	116.5	139	79.25	0	0
13105.m10281	LOC_Os05g22724.1	intron_1	1054	1365.33	1151.58	526.25	0	0
13104.m11771	LOC_Os04g16826.1	intron_1	1057	1391.33	1166.58	533.25	0	0
13110.m07749	LOC_Os10g21344.1	intron_1	1050	1339.83	1138.08	523.25	0	0
13104.m03208	LOC_Os04g33260.1	intron_5	616	138	156.5	90.5	0	0
13107.m24466	LOC_Os07g23930.1	intron_7	769	122	120	81	0	0
13105.m03771	LOC_Os05g35980.2	intron_2	584	181	178	83	0	0
13103.m05264	LOC_Os03g48710.3	intron_1	2695	109.5	127.667	101.333	0	0
13108.m00979	LOC_Os08g09300.2	intron_3	1075	92	82.5	70	0	5.83146422884892e-317
13111.m02865	LOC_Os11g29680.1	intron_1	1443	103	131	121	0	0
13103.m02674	LOC_Os03g22250.1	intron_2	2160	135	137	120	0	0
13105.m01454	LOC_Os05g13860.1	intron_4	714	103.333	112	88	0	0
13108.m00201	LOC_Os08g02620.1	intron_2	1363	119	150	148	0	0
13106.m05438	LOC_Os06g50560.1	intron_3	1057	92	99.5	105	0	0
13106.m05438	LOC_Os06g50560.1	intron_4	1722	114.833	131.417	105.667	0	0
13102.m01540	LOC_Os02g13850.1	intron_17	986	169.667	268	185.583	0	0
13104.m05651	LOC_Os04g54610.1	intron_1	788	176	176	155	0	0
13112.m00210	LOC_Os12g02690.2	intron_1	975	85.4167	91.4167	70.1667	0	0
13105.m10346	LOC_Os05g08770.2	intron_1	1624	164.25	176	110	0	0
13111.m00945	LOC_Os11g08980.1	intron_9	566	418	481.5	354	0	0
13104.m03479	LOC_Os04g35620.1	intron_4	600	105.5	116	111	0	0
13102.m01930	LOC_Os02g17292.2	intron_1	6141	711	811.5	677.5	0	0
13107.m00989	LOC_Os07g09790.1	intron_3	2330	304	334	246	0	0
13103.m00886	LOC_Os03g07890.1	intron_1	479	77	108	81	0	0
13111.m00905	LOC_Os11g08590.1	intron_2	575	140	186	145	0	0
13111.m00905	LOC_Os11g08590.1	intron_9	923	169.5	188	167	0	0
13101.m03252	LOC_Os01g32259.1	intron_3	693	82	95	80	0	0
13102.m02876	LOC_Os02g26570.1	intron_2	399	96	119	81	0	0
13102.m02876	LOC_Os02g26570.1	intron_3	457	74	99	68	0	0
13106.m04813	LOC_Os06g45650.1	intron_6	1389	249.25	283.5	227.5	0	0
13110.m02704	LOC_Os10g31150.1	intron_1	297	96.5	123	97	0	0
13109.m02699	LOC_Os09g27660.4	intron_6	1889	317	399	335	0	0
13102.m02355	LOC_Os02g21009.2	intron_1	9209	197	208.417	136.167	0	0
13109.m00649	LOC_Os09g07910.1	intron_1	304	63.5	107.333	76.6667	0	0
13105.m01280	LOC_Os05g11810.1	intron_3	510	95	94.5	71	0	0
13110.m03783	LOC_Os10g40790.1	intron_3	1655	177.25	227.5	165.333	0	0
13110.m03783	LOC_Os10g40790.1	intron_4	888	217.5	253	194.5	0	0
13103.m07113	LOC_Os03g64080.1	intron_31	1097	128	125	90	0	0
13112.m00021	LOC_Os12g01180.1	intron_1	752	76	82	67	0	5.98001247625578e-318
13111.m04108	LOC_Os11g41410.1	intron_2	4918	196.083	197.583	141.5	0	0
13104.m05511	LOC_Os04g53520.1	intron_2	5871	155.833	176	151	0	0
13101.m07081	LOC_Os01g65530.1	intron_5	1480	98	107.5	87	0	0
13106.m00433	LOC_Os06g04680.2	intron_1	509	73	93	68	0	0
13109.m02587	LOC_Os09g26770.3	intron_2	1944	108.333	113.333	107.333	0	0
13103.m05503	LOC_Os03g50570.1	intron_4	2317	2708	2894	2565.5	0	0
13102.m02880	LOC_Os02g26614.1	intron_11	748	378.333	390.833	333.833	0	0
13102.m02880	LOC_Os02g26614.1	intron_5	3430	113	112.5	131	0	0
13101.m05282	LOC_Os01g50730.1	intron_2	1510	93	119	128.5	0	0
13112.m02219	LOC_Os12g21870.1	intron_3	879	78	87	70	0	3.81912744235284e-321
13106.m04826	LOC_Os06g45780.1	intron_1	585	306.5	383.5	292	0	0
13112.m01124	LOC_Os12g10604.1	intron_2	853	443	396	181	0	0
13112.m01124	LOC_Os12g10604.1	intron_3	255	190.333	207.333	127.333	0	0
13112.m01124	LOC_Os12g10604.1	intron_4	402	400	397	233	0	0
13112.m01124	LOC_Os12g10604.1	intron_5	801	141.333	148.25	98	0	0
13112.m01124	LOC_Os12g10604.1	intron_6	2828	331.833	355.167	221.333	0	0
13106.m04109	LOC_Os06g39624.2	intron_3	2033	89	103	104	0	0
13112.m00475	LOC_Os12g04880.2	intron_1	2651	114	135	131	0	0
13106.m05255	LOC_Os06g49210.1	intron_6	471	61.3333	92	64	0	0
13109.m01264	LOC_Os09g13720.1	intron_2	1670	167	222	167	0	0
13111.m04384	LOC_Os11g43934.1	intron_1	920	117.083	112.583	113.333	0	0
13103.m00751	LOC_Os03g06835.1	intron_1	2654	120	144	93	0	0
13105.m03415	LOC_Os05g33090.1	intron_1	318	152	175	171	0	0
13105.m03415	LOC_Os05g33090.1	intron_3	403	4036	4471	3821	0	0
13106.m00366	LOC_Os06g04169.2	intron_3	4458	136.5	114.5	126	0	0
13107.m01056	LOC_Os07g10400.1	intron_1	1228	98	118	78	0	0
13105.m04505	LOC_Os05g42360.1	intron_1	590	364	422	378	0	0
13101.m04944	LOC_Os01g47750.1	intron_3	134	68	71	71	0	0
13108.m02095	LOC_Os08g20090.2	intron_1	1819	129	152	102	0	0
13112.m02078	LOC_Os12g19580.1	intron_1	2804	410.917	440.333	370.083	0	0
13101.m00665	LOC_Os01g06680.1	intron_2	464	96.0833	98.0833	51.1667	0	0
13105.m05412	LOC_Os05g50440.1	intron_6	1658	195.5	211	169	0	0
13101.m04744	LOC_Os01g46200.1	intron_1	4257	283	328.833	271.833	0	0
13101.m04816	LOC_Os01g46820.1	intron_1	1183	266.5	260	286	0	0
13103.m04568	LOC_Os03g42464.1	intron_3	2367	125	140	67	0	0
13105.m00567	LOC_Os05g05440.1	intron_11	455	88	83	89	0	0
13107.m00694	LOC_Os07g07180.1	intron_4	369	74	61.6667	63	0	0
13102.m06729	LOC_Os02g58139.3	intron_7	3339	120.5	121.5	106	0	0
13104.m05688	LOC_Os04g54930.1	intron_7	2042	123	109	113	0	0
13108.m01924	LOC_Os08g18079.1	intron_4	1178	103	118	62	0	0
13106.m02543	LOC_Os06g23670.1	intron_5	298	68.75	85	76.5833	0	0
13108.m00189	LOC_Os08g02500.1	intron_4	577	100	81	71	0	0
13106.m02285	LOC_Os06g21369.1	intron_2	574	114	144	109.5	0	0
13108.m01756	LOC_Os08g16430.1	intron_1	307	62	61	74	0	0
13105.m02345	LOC_Os05g23140.1	intron_1	6069	142.5	143	126.5	0	0
13107.m00621	LOC_Os07g06530.1	intron_1	1754	160.333	161.25	121	0	0
13112.m01125	LOC_Os12g10610.1	intron_2	1085	746.75	763.5	591.75	0	0
13101.m01419	LOC_Os01g12950.4	intron_8	326	109.5	117.5	76.5	0	0
13112.m03776	LOC_Os12g36820.1	intron_1	268	155	141	124	0	0
13104.m05886	LOC_Os04g56500.1	intron_1	606	445	448	329	0	0
13110.m02097	LOC_Os10g24940.1	intron_9	6037	252.333	303.667	228.417	0	0
13109.m00195	LOC_Os09g02750.1	intron_6	1111	104	92	79.75	0	0
13106.m05286	LOC_Os06g49420.2	intron_1	5523	129.75	152.167	106.167	0	3.47881451553518e-311
13112.m00302	LOC_Os12g03460.1	intron_2	1561	96	106	73	0	0
13111.m03365	LOC_Os11g34650.1	intron_1	2265	242.5	233.667	196.833	0	0
13111.m03365	LOC_Os11g34650.1	intron_3	281	77	103	68	0	0
13106.m00965	LOC_Os06g09050.1	intron_4	127	54	59	50	0	0
13101.m04616	LOC_Os01g45040.1	intron_4	542	70.3333	68.3333	77	0	0
13112.m01245	LOC_Os12g11790.1	intron_1	940	103	97.5	86	0	0
13106.m02840	LOC_Os06g27610.1	intron_5	442	91	104.5	59	0	0
13103.m04561	LOC_Os03g42380.1	intron_2	9345	327.583	359.667	262.5	0	0
13103.m01464	LOC_Os03g12750.1	intron_1	1117	222.833	255.167	147.5	0	0
13104.m01524	LOC_Os04g16830.1	intron_6	1089	235.333	217.833	134.167	0	0
13112.m04377	LOC_Os12g41850.1	intron_2	1265	91.5833	117	93.5	0	0
13109.m07594	LOC_Os09g36619.2	intron_1	391	621	632.333	443.5	0	0
13102.m02501	LOC_Os02g22280.1	intron_15	554	95.8333	83.1667	54	0	0
13111.m00824	LOC_Os11g07890.1	intron_3	1008	101	100	88	0	0
13107.m00417	LOC_Os07g04730.1	intron_3	323	84	99	91.5	0	0
13107.m00417	LOC_Os07g04730.1	intron_4	733	82.5	92	94.5833	0	0
13103.m06879	LOC_Os03g62300.1	intron_1	225	119	122	97	0	0
13102.m02033	LOC_Os02g18110.1	intron_3	1655	102.333	126	77.3333	0	0
13103.m04973	LOC_Os03g46230.1	intron_2	1614	493.25	430.25	253.833	0	0
13111.m00312	LOC_Os11g03720.1	intron_3	825	80	75.6667	81.3333	0	0
13107.m01074	LOC_Os07g10560.1	intron_1	1395	111	109.5	93.5	0	0
13110.m01799	LOC_Os10g21700.1	intron_1	318	83	72	84	0	0
13101.m06016	LOC_Os01g56764.1	intron_1	7499	4724.5	5324.5	4416.17	0	0
13103.m06495	LOC_Os03g59152.1	intron_4	276	96	88	78	0	0
13109.m02954	LOC_Os09g29790.1	intron_3	1328	170	201	170	0	0
13104.m00464	LOC_Os04g05430.2	intron_2	1758	113.417	132.917	97.0833	0	0
13104.m00547	LOC_Os04g06280.1	intron_8	2115	127.5	135	154	0	0
13104.m00547	LOC_Os04g06280.1	intron_9	1962	387.333	407.667	369.167	0	0
13102.m03542	LOC_Os02g32690.1	intron_4	5495	43000.9	49946.2	42637.8	0	0
13111.m01610	LOC_Os11g15590.1	intron_2	206	76.5	77.5	55	0	0
13111.m01610	LOC_Os11g15590.1	intron_4	460	110.25	126.333	71.8333	0	0
13104.m01857	LOC_Os04g20200.1	intron_3	1621	158	147	126	0	0
13102.m03543	LOC_Os02g32690.2	intron_4	5495	43000.9	49946.2	42637.8	0	0
13108.m01126	LOC_Os08g10560.1	intron_2	163	113	121	125	0	0
13101.m05159	LOC_Os01g49614.3	intron_1	6768	175.5	171.417	147.75	0	0
13104.m02886	LOC_Os04g30410.1	intron_1	2241	94	112.833	105	0	0
13112.m03397	LOC_Os12g33289.1	intron_1	874	94.5	104	89.5	0	0
13108.m02027	LOC_Os08g19480.1	intron_4	519	135.25	119	132	0	0
13108.m02027	LOC_Os08g19480.1	intron_5	1614	492.25	430.25	253.833	0	0
13106.m02554	LOC_Os06g23770.1	intron_2	1138	97	95	74.5	0	0
13102.m04612	LOC_Os02g41760.1	intron_2	533	176	137	23	0	0
13109.m03730	LOC_Os09g37590.1	intron_1	1350	105	106	83	0	0
13101.m04437	LOC_Os01g43040.1	intron_2	141	64	71	47	0	0
13106.m01644	LOC_Os06g14830.1	intron_2	88	105.5	124.75	96.5	0	0
13102.m01333	LOC_Os02g12320.1	intron_2	1756	117.667	147.833	103.167	0	0
13110.m03022	LOC_Os10g34000.1	intron_2	114	396	445	380.5	0	0
13103.m04575	LOC_Os03g42530.1	intron_1	1232	2142.5	2378	2090	0	0
13107.m00128	LOC_Os07g02070.1	intron_1	1734	354.5	395.333	270	0	0
13103.m02599	LOC_Os03g21660.1	intron_4	677	81.5	82	52.5	0	2.42673987696835e-311
13101.m05157	LOC_Os01g49614.1	intron_1	6768	175.5	171.417	147.75	0	0
13107.m00474	LOC_Os07g05240.1	intron_1	460	181	224	168	0	0
13106.m01965	LOC_Os06g17920.1	intron_4	897	138	152	118	0	0
13105.m02930	LOC_Os05g28470.1	intron_3	787	84	85	70	0	0
13103.m03292	LOC_Os03g28180.1	intron_2	493	107	129	68	0	0
13102.m02502	LOC_Os02g22290.1	intron_1	2356	188	176.5	161.333	0	0
13105.m02310	LOC_Os05g22830.1	intron_4	320	336.5	334.5	124.5	0	0
13105.m02310	LOC_Os05g22830.1	intron_3	921	77.5	91	70	0	8.39911597930119e-323
13105.m04909	LOC_Os05g46110.1	intron_2	755	134	133	123.5	0	0
13105.m03504	LOC_Os05g33760.1	intron_2	676	199	215.5	210	0	0
13110.m00638	LOC_Os10g07160.1	intron_9	484	82.5833	65	58.25	0	2.07507571253324e-322
13112.m01276	LOC_Os12g12110.1	intron_1	1412	78.5	113	78.5	0	0
13111.m01238	LOC_Os11g11660.1	intron_1	609	85.25	79.5	70.5833	0	0
13110.m00862	LOC_Os10g09780.1	intron_1	472	87.1667	87.8333	87.8333	0	0
13112.m02812	LOC_Os12g27640.1	intron_2	214	98	114	109	0	0
13108.m02928	LOC_Os08g28350.1	intron_4	930	242	261.5	162	0	0
13103.m06662	LOC_Os03g60670.1	intron_1	938	4865	5137	2945.5	0	0
13109.m00754	LOC_Os09g08890.1	intron_2	586	280	310	151	0	0
13107.m01277	LOC_Os07g12370.1	intron_2	2157	116.833	122.833	118.917	0	0
13104.m05787	LOC_Os04g55770.1	intron_5	2633	207	249	210	0	0
13101.m06176	LOC_Os01g58160.1	intron_2	458	68.8333	60.9167	69	0	8.72717422571401e-313
13101.m02718	LOC_Os01g25660.1	intron_1	638	321	358	294	0	0
13106.m02178	LOC_Os06g20380.1	intron_1	850	70.4167	90.75	88.25	0	0
13109.m00213	LOC_Os09g02910.1	intron_5	1218	177	184.333	157.333	0	0
13103.m02849	LOC_Os03g24110.1	intron_1	881	89.3333	85.9167	76	0	0
13112.m02389	LOC_Os12g23520.1	intron_1	793	207	288	204.5	0	0
13103.m03943	LOC_Os03g35970.1	intron_1	2476	1170.33	1206.83	1109.75	0	0
13106.m03032	LOC_Os06g29360.1	intron_2	535	104	106.333	118.75	0	0
13101.m06011	LOC_Os01g56710.1	intron_1	552	184	204.667	171.333	0	0
13111.m03417	LOC_Os11g35110.1	intron_2	915	127.833	144.25	94.6667	0	0
13104.m01245	LOC_Os04g13560.1	intron_1	1690	743	781	651	0	0
13109.m01069	LOC_Os09g11870.1	intron_2	1923	95.75	104	92	0	0
13104.m01915	LOC_Os04g20774.1	intron_3	261	349	374	313	0	0
13109.m00463	LOC_Os09g06220.1	intron_3	2206	109.667	107.5	109.583	0	0
13103.m04945	LOC_Os03g46010.1	intron_1	658	688	750	634	0	0
13104.m02908	LOC_Os04g30630.1	intron_2	1248	411	421.833	340.833	0	0
13104.m03374	LOC_Os04g34700.1	intron_1	1079	1766.92	1796.67	1897.75	0	0
13105.m05026	LOC_Os05g47450.1	intron_2	920	243	278	238	0	0
13106.m02694	LOC_Os06g25110.1	intron_1	770	128.833	131.917	122.5	0	0
13107.m00506	LOC_Os07g05500.1	intron_1	869	773	859	712	0	0
13108.m02487	LOC_Os08g24250.1	intron_1	1150	336.833	385	383.333	0	0
13109.m01973	LOC_Os09g20740.1	intron_1	960	220.833	220.5	201.75	0	0
13110.m00047	LOC_Os10g01490.1	intron_1	1054	183.917	210.333	168.417	0	0
13107.m03863	LOC_Os07g37550.1	intron_1	152	54	69	36	8.60777e-308	8.51350558326645e-311
13101.m00566	LOC_Os01g05820.1	intron_5	239	60	54	59	9.02849e-308	1.37883484796990e-310
13101.m08166	LOC_Os01g74670.1	intron_2	1608	94	95	78	2.14608e-307	2.6323153051161e-310
13112.m03574	LOC_Os12g34990.2	intron_4	665	78.5	79	57	3.22404e-307	4.51397974430431e-310
13101.m14936	LOC_Os01g16960.2	intron_1	3569	92.5	130	113.5	3.2976e-307	6.43639011297364e-310
13104.m00181	LOC_Os04g02620.1	intron_1	716	87	84	47	8.07438e-307	0
13109.m03290	LOC_Os09g32870.1	intron_1	1362	73	93.75	88.5	1.01575e-306	0
13101.m00545	LOC_Os01g05650.1	intron_2	611	91.5	73	45.5	2.59665e-306	0
13109.m01363	LOC_Os09g14610.2	intron_3	167	55	70	36	3.44113e-306	0
13102.m06328	LOC_Os02g55200.2	intron_1	4294	138.417	110.167	106.833	4.75168e-306	0
13104.m01920	LOC_Os04g20810.2	intron_3	1307	86	106	59.5	4.79691e-305	3.58838e-308
13110.m03349	LOC_Os10g36900.1	intron_2	272	58	56	62	9.64833e-305	9.19579e-308
13102.m05763	LOC_Os02g50780.1	intron_1	920	81	79	70	1.93959e-304	2.04606e-307
13106.m05175	LOC_Os06g48640.3	intron_24	173	64	45	52	7.94116e-304	6.65646e-307
13101.m00665	LOC_Os01g06680.1	intron_3	1007	88.3333	77.3333	69	8.55709e-304	1.1619e-306
13112.m03525	LOC_Os12g34550.1	intron_3	1100	100.917	97	41.9167	1.00835e-303	1.74612e-306
13101.m02261	LOC_Os01g21250.1	intron_1	131	45	68	40	1.57227e-303	2.65656e-306
13109.m01071	LOC_Os09g11890.1	intron_2	967	89.25	95.5	47.5	1.89737e-303	3.75431e-306
13104.m03906	LOC_Os04g40190.2	intron_1	109	50	53	45	2.21303e-303	5.03357e-306
13103.m01507	LOC_Os03g13030.2	intron_2	239	57	59	55	2.29181e-303	6.35693e-306
13104.m11898	LOC_Os04g35380.5	intron_6	1249	85	98.5	64	3.10249e-303	8.14764e-306
13108.m03814	LOC_Os08g36320.1	intron_5	378	63.6667	67.3333	56.3333	1.13825e-302	1.47224e-305
13108.m03207	LOC_Os08g30980.1	intron_2	859	73	89	63	2.02111e-302	2.63899e-305
13102.m04734	LOC_Os02g42690.1	intron_1	4152	126.5	119.5	102	1.59277e-301	1.18336e-304
13105.m03483	LOC_Os05g33620.1	intron_7	463	62	74	59	2.56936e-301	2.66528e-304
13110.m01275	LOC_Os10g14870.1	intron_3	224	63	53	52	2.76064e-301	4.25581e-304
13111.m00021	LOC_Os11g01154.1	intron_2	608	70.5	69	67.5	2.9248e-301	5.93912e-304
13111.m09178	LOC_Os11g01154.4	intron_2	608	70.5	69	67.5	3.10329e-301	7.72331e-304
13102.m05981	LOC_Os02g52450.2	intron_1	1253	87.5	91.5	67.5	4.06675e-301	1.00601e-303
13104.m05972	LOC_Os04g57200.1	intron_2	180	62	54	45	5.54153e-301	1.32428e-303
13102.m12369	LOC_Os02g07680.5	intron_14	4398	112	127	115	6.79101e-301	1.71403e-303
13104.m02694	LOC_Os04g28440.1	intron_3	66	40	44	51	2.0288e-300	2.87902e-303
13105.m01745	LOC_Os05g16570.1	intron_2	144	44	50	60	1.00345e-299	8.64102e-303
13106.m05430	LOC_Os06g50510.1	intron_12	336	61.6667	71	48.6667	1.09337e-299	1.49126e-302
13111.m03324	LOC_Os11g34270.1	intron_2	1996	107	115	56	2.22938e-299	2.76945e-302
13101.m05873	LOC_Os01g55670.1	intron_2	475	67.5	75	52.5	3.34974e-299	4.68859e-302
13102.m03818	LOC_Os02g35170.1	intron_4	1132	82	85	72	3.41003e-299	6.64007e-302
13102.m00301	LOC_Os02g03230.1	intron_5	197	61	71	31	4.71403e-299	9.33617e-302
13103.m06506	LOC_Os03g59264.1	intron_2	393	59	63	65	5.77317e-299	1.26354e-301
13110.m01081	LOC_Os10g11870.1	intron_15	575	62	74	67	1.26811e-298	1.98829e-301
13101.m00002	LOC_Os01g01010.2	intron_9	792	70.5	86.5	61.5	1.9716e-298	3.11442e-301
13108.m02795	LOC_Os08g27100.1	intron_1	287	69	49	57	2.00119e-298	4.25618e-301
13103.m02562	LOC_Os03g21380.2	intron_1	1124	76	87	75	2.69441e-298	5.79253e-301
13111.m04082	LOC_Os11g41150.1	intron_1	458	73	79	41	2.77474e-298	7.37298e-301
13102.m05479	LOC_Os02g48460.1	intron_5	593	83	74	47	7.80183e-298	1.18193e-300
13105.m00116	LOC_Os05g01710.3	intron_1	230	50	65.5	51.75	1.04661e-297	1.77796e-300
13103.m03622	LOC_Os03g31679.1	intron_2	836	67	72	82	1.21845e-297	2.47122e-300
13108.m00206	LOC_Os08g02640.3	intron_2	69	43	47.3333	44.3333	4.73971e-297	5.16896e-300
13103.m02266	LOC_Os03g18940.1	intron_1	2897	104	114	90	5.08918e-297	8.06254e-300
13109.m00970	LOC_Os09g10930.1	intron_1	284	48.5	66	59.5	6.8065e-297	1.19297e-299
13102.m03908	LOC_Os02g35900.1	intron_3	1897	99.5	88	84.6667	2.23813e-296	2.46467e-299
13109.m02749	LOC_Os09g27970.1	intron_2	470	69.5	68	55.5	2.28025e-296	3.75887e-299
13112.m02197	LOC_Os12g21700.1	intron_1	1386	79	101	70	3.31153e-296	5.63722e-299
13102.m03519	LOC_Os02g32530.1	intron_1	2157	102	82.3333	97.6667	3.58092e-296	7.66633e-299
13109.m03540	LOC_Os09g36040.1	intron_5	618	70	82	53	6.86645e-296	1.15567e-298
13109.m01439	LOC_Os09g15284.1	intron_1	1145	67.8333	105.5	64.1667	1.47978e-295	1.99389e-298
13108.m09339	LOC_Os08g07540.3	intron_5	1317	91.25	93.9167	60.75	4.33791e-295	4.4505e-298
13108.m00775	LOC_Os08g07540.2	intron_6	1317	91.25	93.9167	60.75	4.5886e-295	7.04628e-298
13110.m00912	LOC_Os10g10180.1	intron_6	94	49.5	55	36.5	6.91823e-295	1.09575e-297
13110.m00914	LOC_Os10g10180.3	intron_6	94	49.5	55	36.5	6.98097e-295	1.48998e-297
13102.m01645	LOC_Os02g14780.2	intron_2	284	58	72	43	6.98889e-295	1.88422e-297
13101.m06692	LOC_Os01g62460.3	intron_2	173	51	63	43	1.67993e-294	2.83227e-297
13104.m05836	LOC_Os04g56140.3	intron_11	81	49	54	34	9.36898e-294	8.12089e-297
13106.m00252	LOC_Os06g03200.1	intron_2	1201	88.5	91.9167	58.8333	9.49299e-294	1.34735e-296
13101.m01615	LOC_Os01g14690.6	intron_1	122	44.6667	53.3333	49	1.27359e-293	2.06491e-296
13101.m06216	LOC_Os01g58550.1	intron_4	1236	81	98	62	1.42443e-293	2.8667e-296
13108.m00839	LOC_Os08g08120.2	intron_2	745	68.6667	79	65	1.80316e-293	3.88095e-296
13109.m02464	LOC_Os09g25710.1	intron_1	93	43	34	63	3.99748e-293	6.1296e-296
13111.m01675	LOC_Os11g16540.1	intron_8	2395	90	113.333	85	6.72404e-293	9.91008e-296
13103.m05959	LOC_Os03g54880.1	intron_1	111	51	56	37	2.8006e-292	2.56559e-295
13105.m03671	LOC_Os05g35170.5	intron_4	321	54.75	71.25	50	5.48714e-292	5.64855e-295
13111.m03644	LOC_Os11g37230.1	intron_1	1406	96	101	51	1.18122e-291	1.22814e-294
13104.m06123	LOC_Os04g58330.1	intron_2	344	55	71	52	8.65264e-291	6.08576e-294
13108.m04191	LOC_Os08g39300.3	intron_1	664	84.3333	82.3333	39	9.08668e-291	1.11815e-293
13108.m04189	LOC_Os08g39300.1	intron_1	664	84.3333	82.3333	39	9.66523e-291	1.6596e-293
13108.m04190	LOC_Os08g39300.2	intron_1	664	84.3333	82.3333	39	9.82366e-291	2.20932e-293
13104.m00937	LOC_Os04g10420.1	intron_5	1669	92	108	59	1.29327e-290	2.9326e-293
13101.m01299	LOC_Os01g12080.1	intron_6	597	74.5	89	37	1.57613e-290	3.81345e-293
13101.m01300	LOC_Os01g12080.3	intron_6	597	74.5	89	37	1.6764e-290	4.74943e-293
13107.m04908	LOC_Os07g46500.1	intron_6	1269	85	85.75	69.75	4.79292e-290	7.42738e-293
13104.m04314	LOC_Os04g43420.1	intron_1	247	52	62	52	8.62688e-290	1.22454e-292
13103.m06136	LOC_Os03g56280.1	intron_2	933	94.0833	75.1667	52.5833	1.25223e-288	8.21958e-292
13104.m04110	LOC_Os04g41810.1	intron_3	672	77	62	66	1.25971e-288	1.52485e-291
13106.m01437	LOC_Os06g13050.1	intron_2	2872	108	89	104	1.98937e-288	2.63414e-291
13101.m02541	LOC_Os01g24030.2	intron_2	460	63	59	66	2.67495e-288	4.12456e-291
13110.m03251	LOC_Os10g36000.1	intron_3	223	64.5	65	32.5	3.30201e-288	5.96284e-291
13110.m03253	LOC_Os10g36000.2	intron_3	223	64.5	65	32.5	3.50998e-288	7.91494e-291
13102.m05325	LOC_Os02g47320.1	intron_1	909	97	67	56	3.69484e-288	9.9678e-291
13103.m01497	LOC_Os03g12940.2	intron_1	1699	92	93.5	73	7.55144e-288	1.41645e-290
13103.m01495	LOC_Os03g12940.1	intron_1	1699	92	93.5	73	7.56968e-288	1.83667e-290
13111.m02811	LOC_Os11g29190.4	intron_2	1038	77	73.5	76.5	1.7538e-287	2.81052e-290
13112.m00598	LOC_Os12g05900.2	intron_1	2186	109	104	64	2.62395e-287	4.26671e-290
13112.m00599	LOC_Os12g05900.1	intron_1	2186	109	104	64	2.82367e-287	5.83217e-290
13111.m03996	LOC_Os11g40410.1	intron_1	1902	87.8333	90.8333	87.5	3.06383e-287	7.52918e-290
13111.m03845	LOC_Os11g39020.1	intron_7	421	67	77	40	3.16714e-287	9.28159e-290
13108.m01004	LOC_Os08g09520.1	intron_1	805	66	76	71	3.77036e-287	1.13665e-289
13103.m02677	LOC_Os03g22270.2	intron_2	836	91	76	48	4.49142e-287	1.38485e-289
13101.m06855	LOC_Os01g63854.1	intron_1	2392	99	108	77	7.28404e-287	1.7874e-289
13109.m03421	LOC_Os09g34100.1	intron_7	729	93	71	44	7.67449e-287	2.21112e-289
13101.m02801	LOC_Os01g26970.1	intron_5	833	85.6667	73.1667	55.5	3.14183e-286	3.94764e-289
13108.m01544	LOC_Os08g14450.1	intron_8	464	75.6667	52.9167	58.75	4.12073e-286	6.22336e-289
13108.m03529	LOC_Os08g33820.1	intron_1	92	46	51	40	7.35825e-286	1.02853e-288
13102.m05245	LOC_Os02g46710.1	intron_3	838	74	81.25	59	1.13715e-285	1.65587e-288
13103.m01090	LOC_Os03g09830.2	intron_3	688	74	70	60	5.82948e-285	4.87211e-288
13101.m15029	LOC_Os01g29804.2	intron_1	5411	114.417	132.583	118.583	9.52364e-285	1.01224e-287
13110.m03392	LOC_Os10g37420.2	intron_2	1523	75	111	63	1.00448e-284	1.56542e-287
13104.m03208	LOC_Os04g33260.1	intron_3	236	54	64.5	43.5	2.15299e-284	2.75078e-287
13108.m02853	LOC_Os08g27630.1	intron_5	1113	106	89	34	2.92318e-284	4.35894e-287
13102.m00795	LOC_Os02g07070.1	intron_16	571	70	68	57	7.17853e-284	8.3073e-287
13101.m02506	LOC_Os01g23680.1	intron_1	1527	92	90	66.5	9.86101e-284	1.37268e-286
13101.m03090	LOC_Os01g29804.1	intron_1	5451	114.417	132.583	118.583	1.18551e-283	2.02366e-286
13107.m04903	LOC_Os07g46460.1	intron_27	203	55	52	50	1.92169e-283	3.07843e-286
13101.m02277	LOC_Os01g21420.1	intron_4	2302	112	90.5	76	2.49579e-283	4.4473e-286
13110.m02015	LOC_Os10g24100.1	intron_2	2208	91	82.5	101	1.30713e-282	1.1619e-285
13101.m02507	LOC_Os01g23680.2	intron_1	1501	92	89	65.5	2.17034e-282	2.35179e-285
13102.m01708	LOC_Os02g15310.1	intron_3	971	79	86	55	6.83034e-282	6.09521e-285
13103.m05714	LOC_Os03g52460.1	intron_14	243	56.25	64	41.5	1.12069e-281	1.22326e-284
13101.m02795	LOC_Os01g26920.2	intron_3	499	64	76	48	1.3764e-281	1.97637e-284
13107.m01522	LOC_Os07g14514.4	intron_1	7833	147.75	149.667	116.583	1.39291e-281	2.7377e-284
13107.m01520	LOC_Os07g14514.6	intron_1	7833	147.75	149.667	116.583	1.40848e-281	3.5067e-284
13110.m03676	LOC_Os10g39880.1	intron_1	90	37.5	56.5	40.5	3.69921e-281	5.52732e-284
13102.m06532	LOC_Os02g56850.4	intron_1	1094	73.5	87.5	65	9.39125e-281	1.06561e-283
13111.m00387	LOC_Os11g04360.1	intron_1	583	60	66	68	1.75275e-280	2.0223e-283
13103.m05957	LOC_Os03g54860.1	intron_3	9302	149.25	173	117.75	4.93106e-280	4.71282e-283
13109.m03664	LOC_Os09g37020.2	intron_4	251	62.5	60.5	39	6.05524e-280	8.01371e-283
13103.m02355	LOC_Os03g19650.3	intron_4	1131	80.6667	92.3333	54.4167	6.88134e-280	1.17614e-282
13102.m06199	LOC_Os02g54130.1	intron_2	169	45	64	41	9.83988e-280	1.71174e-282
13102.m06197	LOC_Os02g54130.2	intron_2	169	45	64	41	9.83992e-280	2.24675e-282
13103.m07107	LOC_Os03g64020.2	intron_5	90	64	45	25	9.89224e-280	2.78402e-282
13108.m03794	LOC_Os08g36150.1	intron_1	2570	99	120	66	9.90071e-280	3.32118e-282
13109.m03937	LOC_Os09g39320.1	intron_16	843	68	91	52	2.17412e-279	4.5016e-282
13103.m05521	LOC_Os03g50740.2	intron_12	1191	81.5	70.5	78	2.42845e-279	5.81897e-282
13108.m01033	LOC_Os08g09790.1	intron_2	1232	65	84.5	82.5	2.68519e-279	7.27436e-282
13110.m00807	LOC_Os10g09200.1	intron_2	984	76	76	67	4.90601e-279	9.93382e-282
13102.m06778	LOC_Os02g58550.1	intron_4	1020	74	106	41	5.38182e-279	1.28486e-281
13105.m05454	LOC_Os05g50800.2	intron_9	84	35	50	47	9.91728e-279	1.82197e-281
13101.m14978	LOC_Os01g01307.2	intron_1	1280	74	79.5	80.5	1.35455e-278	2.55516e-281
13102.m03535	LOC_Os02g32640.1	intron_1	697	65	64	72	4.20638e-278	4.83242e-281
13102.m05289	LOC_Os02g47020.1	intron_1	293	81	65	20	1.85001e-277	1.48461e-280
13111.m03316	LOC_Os11g34220.1	intron_3	1548	81	99.25	65	3.24552e-277	3.24004e-280
13102.m00834	LOC_Os02g07340.1	intron_13	3737	113.75	120	84	4.49591e-277	5.66982e-280
13102.m29152	LOC_Os02g58260.1	intron_4	445	59	73	49	5.52958e-277	8.65571e-280
13108.m04857	LOC_Os08g44670.1	intron_1	543	48	66	75	7.57417e-277	1.2743e-279
13102.m00284	LOC_Os02g03090.2	intron_5	395	69	67	40	2.29086e-276	2.51057e-279
13112.m02137	LOC_Os12g20144.1	intron_6	1828	130	97	29	4.04571e-276	4.69255e-279
13105.m05182	LOC_Os05g48630.2	intron_1	128	51	43	47	6.91225e-276	8.41831e-279
13107.m02365	LOC_Os07g23990.1	intron_6	929	76.5	72	65.5	1.26268e-275	1.52207e-278
13107.m02366	LOC_Os07g23990.2	intron_6	929	76.5	72	65.5	1.27623e-275	2.20887e-278
13102.m12417	LOC_Os02g39730.2	intron_3	695	66	81	52	9.99518e-275	7.59011e-278
13102.m12416	LOC_Os02g39730.3	intron_3	695	66	81	52	1.01877e-274	1.30692e-277
13106.m01742	LOC_Os06g15779.1	intron_1	2096	87	101	77	1.53932e-274	2.13425e-277
13112.m03241	LOC_Os12g31850.3	intron_1	509	71.75	69.9167	43.5	1.60231e-274	2.99456e-277
13101.m05404	LOC_Os01g51754.2	intron_10	240	48	58	52	1.76147e-274	3.93947e-277
13106.m00621	LOC_Os06g06115.1	intron_1	1363	90	83	62	4.15697e-274	6.16988e-277
13103.m02629	LOC_Os03g21890.1	intron_8	396	71	54	50	5.04153e-274	8.87271e-277
13105.m01300	LOC_Os05g11990.1	intron_5	512	54	60.5	70.5	8.98768e-274	1.36897e-276
13102.m00738	LOC_Os02g06640.3	intron_1	962	72.3333	84	58.3333	1.43278e-273	2.13648e-276
13102.m00736	LOC_Os02g06640.1	intron_1	962	72.3333	84	58.3333	1.43675e-273	2.9053e-276
13102.m00739	LOC_Os02g06640.4	intron_1	962	72.3333	84	58.3333	1.45231e-273	3.68163e-276
13103.m03613	LOC_Os03g31594.1	intron_2	8726	130.5	161.5	131.25	1.51703e-273	4.49177e-276
13103.m03614	LOC_Os03g31594.2	intron_2	8726	130.5	161.5	131.25	1.53826e-273	5.31241e-276
13103.m05928	LOC_Os03g54100.2	intron_1	883	72.5	77.5	60	2.33067e-273	6.55591e-276
13112.m03574	LOC_Os12g34990.2	intron_3	1309	85.6667	93.3333	53	3.52383e-273	8.4358e-276
13101.m03859	LOC_Os01g37870.4	intron_10	1342	88.3333	83.5	61.6667	3.68931e-273	1.04021e-275
13101.m03858	LOC_Os01g37870.1	intron_11	1342	88.3333	83.5	61.6667	3.7125e-273	1.23786e-275
13112.m03575	LOC_Os12g34990.3	intron_3	1309	85.6667	93.3333	53	3.71673e-273	1.43553e-275
13105.m03969	LOC_Os05g38000.2	intron_1	2590	91.8333	85.5	103.5	4.97804e-273	1.70026e-275
13109.m00972	LOC_Os09g10930.2	intron_1	269	44.5	61	55.5	5.50494e-273	1.9928e-275
13105.m02176	LOC_Os05g20590.1	intron_1	816	63.3333	69.0833	73.75	8.14417e-273	2.42563e-275
13101.m03073	LOC_Os01g29610.1	intron_8	507	62.6667	75.6667	45.5	2.09184e-272	3.5382e-275
13107.m24461	LOC_Os07g01760.1	intron_8	471	58	66	57	2.17577e-272	4.69426e-275
13107.m09970	LOC_Os07g01904.2	intron_2	2531	88	104.333	86	3.48155e-272	6.54365e-275
13105.m00891	LOC_Os05g08090.3	intron_10	866	86	77	45	1.35076e-271	1.37212e-274
13112.m00212	LOC_Os12g02690.4	intron_1	1820	92.6667	106.083	53.75	1.7876e-271	2.32123e-274
13102.m02219	LOC_Os02g19820.1	intron_4	1333	87	86	59	2.11511e-271	3.44327e-274
13102.m03641	LOC_Os02g33580.1	intron_2	608	75.5	83.5	32	3.24603e-271	5.16439e-274
13107.m04197	LOC_Os07g40390.1	intron_1	505	62	70	51	4.02708e-271	7.29803e-274
13107.m00642	LOC_Os07g06680.1	intron_1	1870	96.5	90.8333	67	4.63706e-271	9.75283e-274
13102.m00728	LOC_Os02g06584.3	intron_8	907	84.6667	80	45.3333	5.13275e-271	1.24677e-273
13110.m01750	LOC_Os10g21190.1	intron_2	699	76	66	55	6.8892e-271	1.61101e-273
13102.m01642	LOC_Os02g14770.3	intron_10	110	44	51.5	39.5	9.94248e-271	2.13649e-273
13102.m01641	LOC_Os02g14770.1	intron_10	110	44	51.5	39.5	1.03652e-270	2.68378e-273
13103.m03212	LOC_Os03g27450.1	intron_1	691	68.5	69.5	58.5	1.04096e-270	3.23284e-273
13101.m07249	LOC_Os01g66890.3	intron_1	565	65	71	51.5	1.23964e-270	3.88633e-273
13101.m07247	LOC_Os01g66890.1	intron_1	565	65	71	51.5	1.24516e-270	4.54205e-273
13104.m05024	LOC_Os04g49220.1	intron_3	534	67	65	53	1.43598e-270	5.29782e-273
13105.m04601	LOC_Os05g43650.1	intron_4	685	61	96	39	1.66063e-270	6.17135e-273
13105.m02325	LOC_Os05g22940.1	intron_3	659	64	68	62	4.1601e-270	8.36224e-273
13102.m02471	LOC_Os02g22060.1	intron_5	2492	88	106	81.5	5.77333e-270	1.14012e-272
13109.m01791	LOC_Os09g18594.2	intron_10	226	47	66	41	8.43935e-270	1.58417e-272
13108.m03939	LOC_Os08g37432.1	intron_1	2222	81.5	109.5	75	1.74042e-269	2.49982e-272
13110.m00807	LOC_Os10g09200.1	intron_3	724	92	71	35	1.95923e-269	3.52968e-272
13112.m00406	LOC_Os12g04270.2	intron_6	416	46.3333	70.3333	57.6667	5.88155e-269	6.62175e-272
13104.m00829	LOC_Os04g09350.4	intron_1	8793	135.5	163.25	121.25	6.54615e-269	1.006e-271
13104.m00828	LOC_Os04g09350.3	intron_1	8793	135.5	163.25	121.25	6.79602e-269	1.36259e-271
13111.m00218	LOC_Os11g02830.1	intron_1	1146	72.0833	86.25	63.0833	9.98383e-269	1.88624e-271
13103.m05465	LOC_Os03g50270.1	intron_1	943	72	79.75	59	1.24052e-268	2.53644e-271
13111.m01772	LOC_Os11g17480.1	intron_1	1992	74.3333	97.25	85.5	1.79713e-268	3.47799e-271
13111.m00219	LOC_Os11g02830.2	intron_1	1151	72.0833	86.25	63.0833	2.58206e-268	4.83015e-271
13103.m00049	LOC_Os03g01320.2	intron_1	149	45	48	48.5	4.73882e-268	7.31128e-271
13109.m02344	LOC_Os09g24670.1	intron_5	752	82	74	43	5.24515e-268	1.0055e-270
13109.m03665	LOC_Os09g37020.1	intron_4	115	48.5	52.5	34	5.49321e-268	1.29258e-270
13101.m07702	LOC_Os01g70800.1	intron_7	446	60	56	60.5	5.64071e-268	1.58707e-270
13109.m03495	LOC_Os09g35690.2	intron_4	956	81	91.5	38.5	6.04891e-268	1.90261e-270
13109.m03494	LOC_Os09g35690.1	intron_4	956	81	91.5	38.5	6.109e-268	2.22096e-270
13104.m11752	LOC_Os04g16844.1	intron_1	748	74	73.25	51	2.69309e-267	3.62684e-270
13108.m09264	LOC_Os08g15292.1	intron_1	748	74	73.25	51	2.69309e-267	5.03126e-270
13104.m01508	LOC_Os04g16680.1	intron_4	301	68	53	41	3.76775e-267	6.99511e-270
13104.m05522	LOC_Os04g53620.4	intron_1	1140	81	80.25	58.75	6.43499e-267	1.03483e-269
13109.m03361	LOC_Os09g33710.1	intron_8	872	77.8333	90.1667	37.5833	7.82371e-267	1.4422e-269
13104.m11896	LOC_Os04g34984.3	intron_11	437	55	61	59	1.02896e-266	1.97764e-269
13110.m07719	LOC_Os10g21326.1	intron_1	748	73.6667	73.25	51	1.08453e-266	2.54147e-269
13105.m02825	LOC_Os05g27520.1	intron_5	745	69.1667	67.8333	60.5	2.69408e-266	3.94258e-269
13101.m04693	LOC_Os01g45750.1	intron_6	835	91	85	27	4.20924e-266	6.13056e-269
13105.m05412	LOC_Os05g50440.1	intron_5	693	70.5	67	56.5	4.44495e-266	8.43884e-269
13105.m05481	LOC_Os05g50980.1	intron_4	249	57	53	45	2.20616e-265	1.9901e-268
13106.m05430	LOC_Os06g50510.1	intron_8	349	60	59.5833	46.3333	4.73151e-265	4.44699e-268
13101.m02960	LOC_Os01g28540.2	intron_4	2214	93	118.5	51	8.01764e-265	8.60753e-268
13103.m02753	LOC_Os03g22810.1	intron_8	461	55	75	46	2.05426e-264	1.92635e-267
13103.m00056	LOC_Os03g01360.4	intron_5	2731	88.3333	106.333	84.3333	2.66778e-264	3.30906e-267
13103.m00556	LOC_Os03g05290.1	intron_1	754	66	66	65	3.93964e-264	5.34966e-267
13101.m04640	LOC_Os01g45274.2	intron_8	190	51.25	57.75	37.5	4.44511e-264	7.65006e-267
13101.m04643	LOC_Os01g45274.1	intron_7	190	51.25	57.75	37.5	4.52603e-264	9.98997e-267
13101.m04642	LOC_Os01g45274.3	intron_8	190	51.25	57.75	37.5	4.56157e-264	1.23459e-266
13101.m04641	LOC_Os01g45274.4	intron_7	190	51.25	57.75	37.5	4.70055e-264	1.47712e-266
13102.m03799	LOC_Os02g35080.2	intron_12	2135	74	105	80	9.10964e-264	1.94738e-266
13101.m15004	LOC_Os01g17396.2	intron_1	686	65.75	78.5	48	1.37511e-263	2.65703e-266
13101.m01944	LOC_Os01g17396.1	intron_1	686	65.75	78.5	48	1.37571e-263	3.36625e-266
13105.m00221	LOC_Os05g02520.2	intron_2	406	62.6667	59	49	1.60677e-263	4.19402e-266
13101.m03639	LOC_Os01g35970.1	intron_3	595	55.25	66.9167	63.5833	2.06546e-263	5.25763e-266
13108.m03638	LOC_Os08g34760.1	intron_3	954	66	72	70	3.45124e-263	7.03483e-266
13106.m03006	LOC_Os06g29120.2	intron_1	748	59.5	68	68.5	3.63523e-263	8.90503e-266
13110.m00772	LOC_Os10g08840.2	intron_8	136	38	48	51	5.06208e-263	1.15084e-265
13105.m03694	LOC_Os05g35274.2	intron_1	116	37	43	53	9.6505e-263	1.64719e-265
13102.m12378	LOC_Os02g12870.6	intron_1	1896	67.1667	104.25	77.9167	2.38523e-262	2.87394e-265
13109.m07565	LOC_Os09g20640.4	intron_2	1597	78	79.75	79.75	4.31534e-262	5.09229e-265
13109.m01460	LOC_Os09g15430.4	intron_1	1501	79.5	93.5	60.5	4.82102e-262	7.56835e-265
13112.m01874	LOC_Os12g17690.1	intron_1	399	65	82	22	9.62668e-262	1.25114e-264
13102.m05047	LOC_Os02g45054.1	intron_3	5078	135.333	121.833	81	3.4921e-261	3.04407e-264
13101.m06783	LOC_Os01g63220.2	intron_3	436	56	71.5	44.5	6.87253e-261	6.5705e-264
13106.m01405	LOC_Os06g12790.1	intron_4	1462	87.5	72.5	71	9.7886e-261	1.15895e-263
13106.m02902	LOC_Os06g28144.1	intron_1	957	73.5	79	54	2.33404e-260	2.3553e-263
13110.m03160	LOC_Os10g35260.1	intron_3	520	64.5	62	52	2.48704e-260	3.62884e-263
13104.m05171	LOC_Os04g50870.1	intron_2	1450	86	83	61	3.5635e-260	5.45255e-263
13112.m00743	LOC_Os12g07140.2	intron_2	1523	92	85	56	6.70671e-260	8.88381e-263
13108.m00081	LOC_Os08g01590.2	intron_1	82	37	52	35	9.76849e-260	1.38785e-262
13106.m05455	LOC_Os06g50724.1	intron_6	349	59	58.5833	45.6667	1.13087e-259	1.96559e-262
13108.m00043	LOC_Os08g01300.1	intron_2	1215	78	75	66	2.15673e-259	3.0672e-262
13102.m03705	LOC_Os02g34190.1	intron_1	2191	97.6667	84.1667	76	2.52126e-259	4.35396e-262
13112.m00362	LOC_Os12g03899.1	intron_1	5278	106.75	121.5	112.667	4.66099e-259	6.73222e-262
13106.m05438	LOC_Os06g50560.1	intron_8	349	59	58.5833	45.3333	6.17629e-259	9.88156e-262
13101.m06559	LOC_Os01g61580.2	intron_3	124	44	52	37	6.55869e-259	1.32228e-261
13106.m01435	LOC_Os06g13030.2	intron_5	259	45	52	56	1.14202e-258	1.90397e-261
13104.m05999	LOC_Os04g57360.1	intron_2	1456	79	90	60	4.61715e-258	4.25629e-261
13110.m03582	LOC_Os10g39150.1	intron_4	376	61	62	42	9.48501e-258	9.08601e-261
13101.m01913	LOC_Os01g17060.1	intron_1	428	57.0833	66.8333	45.5833	1.5356e-257	1.69001e-260
13111.m01093	LOC_Os11g10320.1	intron_1	1465	90.4167	95.4167	43.1667	2.87066e-257	3.15005e-260
13101.m07745	LOC_Os01g71114.1	intron_3	1042	65	82	62	4.65205e-257	5.5147e-260
13103.m06506	LOC_Os03g59264.1	intron_4	189	50	62	31	6.38539e-257	8.75815e-260
13105.m02324	LOC_Os05g22930.1	intron_5	901	78.3333	65	58	1.07427e-256	1.42124e-259
13106.m00527	LOC_Os06g05424.1	intron_1	629	60.5	66	58	1.13458e-256	1.99674e-259
13103.m05927	LOC_Os03g54100.1	intron_1	860	68.5	72.5	58	1.23167e-256	2.62093e-259
13102.m04121	LOC_Os02g37654.1	intron_1	9026	130.5	150.667	130.75	3.76304e-256	4.52881e-259
13111.m02057	LOC_Os11g20330.1	intron_1	9081	149.75	146.583	116.333	4.90147e-256	7.01204e-259
13111.m09226	LOC_Os11g20330.2	intron_1	9081	149.75	146.583	116.333	4.90147e-256	9.49276e-259
13101.m04995	LOC_Os01g48210.2	intron_2	4120	113.5	107.5	90	5.05037e-256	1.20464e-258
13107.m01131	LOC_Os07g11000.1	intron_1	655	67	71	48	5.26468e-256	1.4706e-258
13102.m03005	LOC_Os02g27592.1	intron_1	376	54	65	45	7.00344e-256	1.82428e-258
13109.m01110	LOC_Os09g12290.1	intron_13	543	56	84	38	7.13456e-256	2.18423e-258
13106.m01564	LOC_Os06g14170.1	intron_1	468	70	57	45	7.54913e-256	2.56478e-258
13106.m05430	LOC_Os06g50510.1	intron_13	316	77	62	19	9.48262e-256	3.04265e-258
13101.m03100	LOC_Os01g29900.1	intron_1	812	103	101.25	90.6667	1.34251e-255	3.71915e-258
13103.m06506	LOC_Os03g59264.1	intron_1	223	54	44	49	2.48388e-255	4.97113e-258
13104.m06271	LOC_Os04g59494.1	intron_28	400	59	59	48	2.57619e-255	6.26841e-258
13104.m06270	LOC_Os04g59494.2	intron_28	400	59	59	48	2.81779e-255	7.68622e-258
13107.m04022	LOC_Os07g38850.1	intron_7	789	67	82	45	3.52827e-255	9.46071e-258
13112.m08926	LOC_Os12g32536.4	intron_3	577	66.6667	67.3333	45.8333	9.38526e-255	1.4184e-257
13101.m05004	LOC_Os01g48300.1	intron_10	748	62.5	86.5	42	2.93891e-254	2.8975e-257
13108.m04928	LOC_Os08g45180.1	intron_8	324	52	59	47	6.53531e-254	6.18508e-257
13105.m05197	LOC_Os05g48760.1	intron_2	1002	84	69	52	1.04879e-253	1.14576e-256
13103.m02173	LOC_Os03g18140.1	intron_4	1382	79	77	67	1.17373e-253	1.73529e-256
13102.m04171	LOC_Os02g38020.1	intron_2	166	47.5	54.5	36	2.377e-253	2.92889e-256
13111.m00412	LOC_Os11g04520.3	intron_7	106	38	47	42	2.78567e-253	4.32656e-256
13110.m02996	LOC_Os10g33840.3	intron_3	921	70.5	76.5	53.25	4.16528e-253	6.41539e-256
13102.m01073	LOC_Os02g09770.3	intron_6	373	57.5	65.5	39	1.8251e-252	1.55697e-255
13105.m00769	LOC_Os05g07070.4	intron_3	2693	89.3333	100.667	79	2.96975e-252	3.04553e-255
13105.m00279	LOC_Os05g03010.1	intron_1	1640	102.333	108	93.3333	3.15683e-252	4.62638e-255
13110.m07842	LOC_Os10g42299.5	intron_3	106	36	47.5	43	6.89891e-252	8.08042e-255
13103.m01004	LOC_Os03g08680.2	intron_5	1831	73	79	87.5	1.53243e-251	1.575e-254
13105.m03858	LOC_Os05g37130.3	intron_3	1131	80.5	85	44.5	3.06653e-251	3.10902e-254
[truncated: 25,184 more rows]
