# Supplementary material for: A Low-Cost Library Construction Protocol and Data Analysis Pipeline for Illumina-Based Strand-Specific Multiplex RNA-Seq
Source: PLoS One. 2011 Oct 19;6(10):e26426. doi: 10.1371/journal.pone.0026426 (PMC3198403; doi:10.1371/journal.pone.0026426)
Supplement: Table S5 — List of nucleotide sequences for multiplex adaptors and RT-PCR primers. (XLSX) [file pone.0026426.s014.xlsx]

## Sheet: Sheet1
Supplemental Table 3. List of nucleotide sequences for multiplex adaptors and RT-PCR primers
Name	Nucleotide Sequence	Notes
Adaptor Set2-1	ACACTCTTTCCCTACACGACGCTCTTCCGATCTGCTA*T	* - Phosphorothioate Bond
Adaptor Set2-2	/5Phos/T*AGCAGATCGGAAGAGCGGTTCAGCAGGAATGCCGAG	/5Phos/ - 5' primer phosphorylation
Adaptor Set3-1	ACACTCTTTCCCTACACGACGCTCTTCCGATCTTGGA*T
Adaptor Set3-2	/5Phos/T*CCAAGATCGGAAGAGCGGTTCAGCAGGAATGCCGAG
Adaptor Set4-1	ACACTCTTTCCCTACACGACGCTCTTCCGATCTATGC*T
Adaptor Set4-2	/5Phos/G*CATAGATCGGAAGAGCGGTTCAGCAGGAATGCCGAG
Adaptor Set6-1	ACACTCTTTCCCTACACGACGCTCTTCCGATCTGAAC*T
Adaptor Set6-2	/5Phos/G*TTCAGATCGGAAGAGCGGTTCAGCAGGAATGCCGAG
Adaptor Set7-1	ACACTCTTTCCCTACACGACGCTCTTCCGATCTAACG*T
Adaptor Set7-2	/5Phos/c*gttAGATCGGAAGAGCGGTTCAGCAGGAATGCCGAG
Adaptor Set8-1	ACACTCTTTCCCTACACGACGCTCTTCCGATCTACCT*T
Adaptor Set8-2	/5Phos/a*ggtAGATCGGAAGAGCGGTTCAGCAGGAATGCCGAG
Adaptor Set9-1	ACACTCTTTCCCTACACGACGCTCTTCCGATCTCGTC*T
Adaptor Set9-2	/5Phos/g*acgAGATCGGAAGAGCGGTTCAGCAGGAATGCCGAG
Adaptor Set10-1	ACACTCTTTCCCTACACGACGCTCTTCCGATCTCTCG*T
Adaptor Set10-2	/5Phos/c*gagAGATCGGAAGAGCGGTTCAGCAGGAATGCCGAG
Adaptor Set11-1	ACACTCTTTCCCTACACGACGCTCTTCCGATCTCTTA*T
Adaptor Set11-2	/5Phos/t*aagAGATCGGAAGAGCGGTTCAGCAGGAATGCCGAG
Adaptor Set12-1	ACACTCTTTCCCTACACGACGCTCTTCCGATCTGAGT*T
Adaptor Set12-2	/5Phos/a*ctcAGATCGGAAGAGCGGTTCAGCAGGAATGCCGAG
Adaptor Set13-1	ACACTCTTTCCCTACACGACGCTCTTCCGATCTGTAT*T
Adaptor Set13-2	/5Phos/a*tacAGATCGGAAGAGCGGTTCAGCAGGAATGCCGAG
PE Primer-F	AATGATACGGCGACCACCGAGATCTACACTCTTTCCCTACACGACGCTCTTCCGATCT
PE Primer-R	CAAGCAGAAGACGGCATACGAGATCGGTCTCGGCATTCCTGCTGAACCGCTCTTCCGATCT
cDNA_05g01600.1_F	CAATGTCCCTGCAATGTACG	Exon detection
cDNA_05g01600.1_R	ACTGTGTGGCTGACACCATC	Exon detection
cDNA_12g18729.1_F	CGTCTCCATGCTATCCAACA	Exon detection
cDNA_12g18729.1_F	CCAATGTGGCTTACTTTTCCA	Exon detection
cDNA_12g19381.1_F	CTACGATGGCAGGTATTGGA	Exon detection
cDNA_12g19381.1_R	ATATGCCTTCTTGGCCTCCT	Exon detection
cDNA_1g48820.1_F	CTCCTTCTTCACCACCAGGA	Exon detection
cDNA_1g48820.1_R	GTCGTCGTCGTCTTCCTCTC	Exon detection
intron_05g01600.1_F	CCTCTGCTGCCATACACTTTT	Intron detection
intron_05g01600.1_R	AAGGATGCTAGCAAATGAGCA	Intron detection
intron_12g18729.1_F	GCCCCACATGTATGAGCTTT	Intron detection
intron_12g18729.1_R	TTCGTGACAATGCACAGGAT	Intron detection
intron_12g19381.1_F	ACGACGCTGTTGTATTGTCG	Intron detection
intron_12g19381.1_R	GTCGCTGGTGCAACTCTAAA	Intron detection
RT_05g01600.1_F	TGACCAATCAAACGAACCAA	Gene specific RT primer
RT_05g01600.1_R	TTGGTTCGTTTGATTGGTCA	Gene specific RT primer
RT_12g18729.1_F	CTTTCCCTCCTCCTCATCCT	Gene specific RT primer
RT_12g18729.1_R	AGGATGAGGAGGAGGGAAAG	Gene specific RT primer
RT_12g19381.1_F	CTCCATTCCAAGGGCTCA	Gene specific RT primer
RT_12g19381.1_R	TGAGCCCTTGGAATGGAG	Gene specific RT primer
RT_1g48820.1_F	CTGCTGCATTCTTGGTTCAA	Gene specific RT primer
RT_1g48820.1_R	TTGAACCAAGAATGCAGCAG	Gene specific RT primer
